# Supplementary material for: Measuring the effect of Non-Pharmaceutical Interventions (NPIs) on mobility during the COVID-19 pandemic using global mobility data
Source: PubMed Central journal article supplement (PMC8119480; doi:10.1038/s41746-021-00451-2), 2021-05-13

Supplementary Figures 1 Apple mobility profiles per country

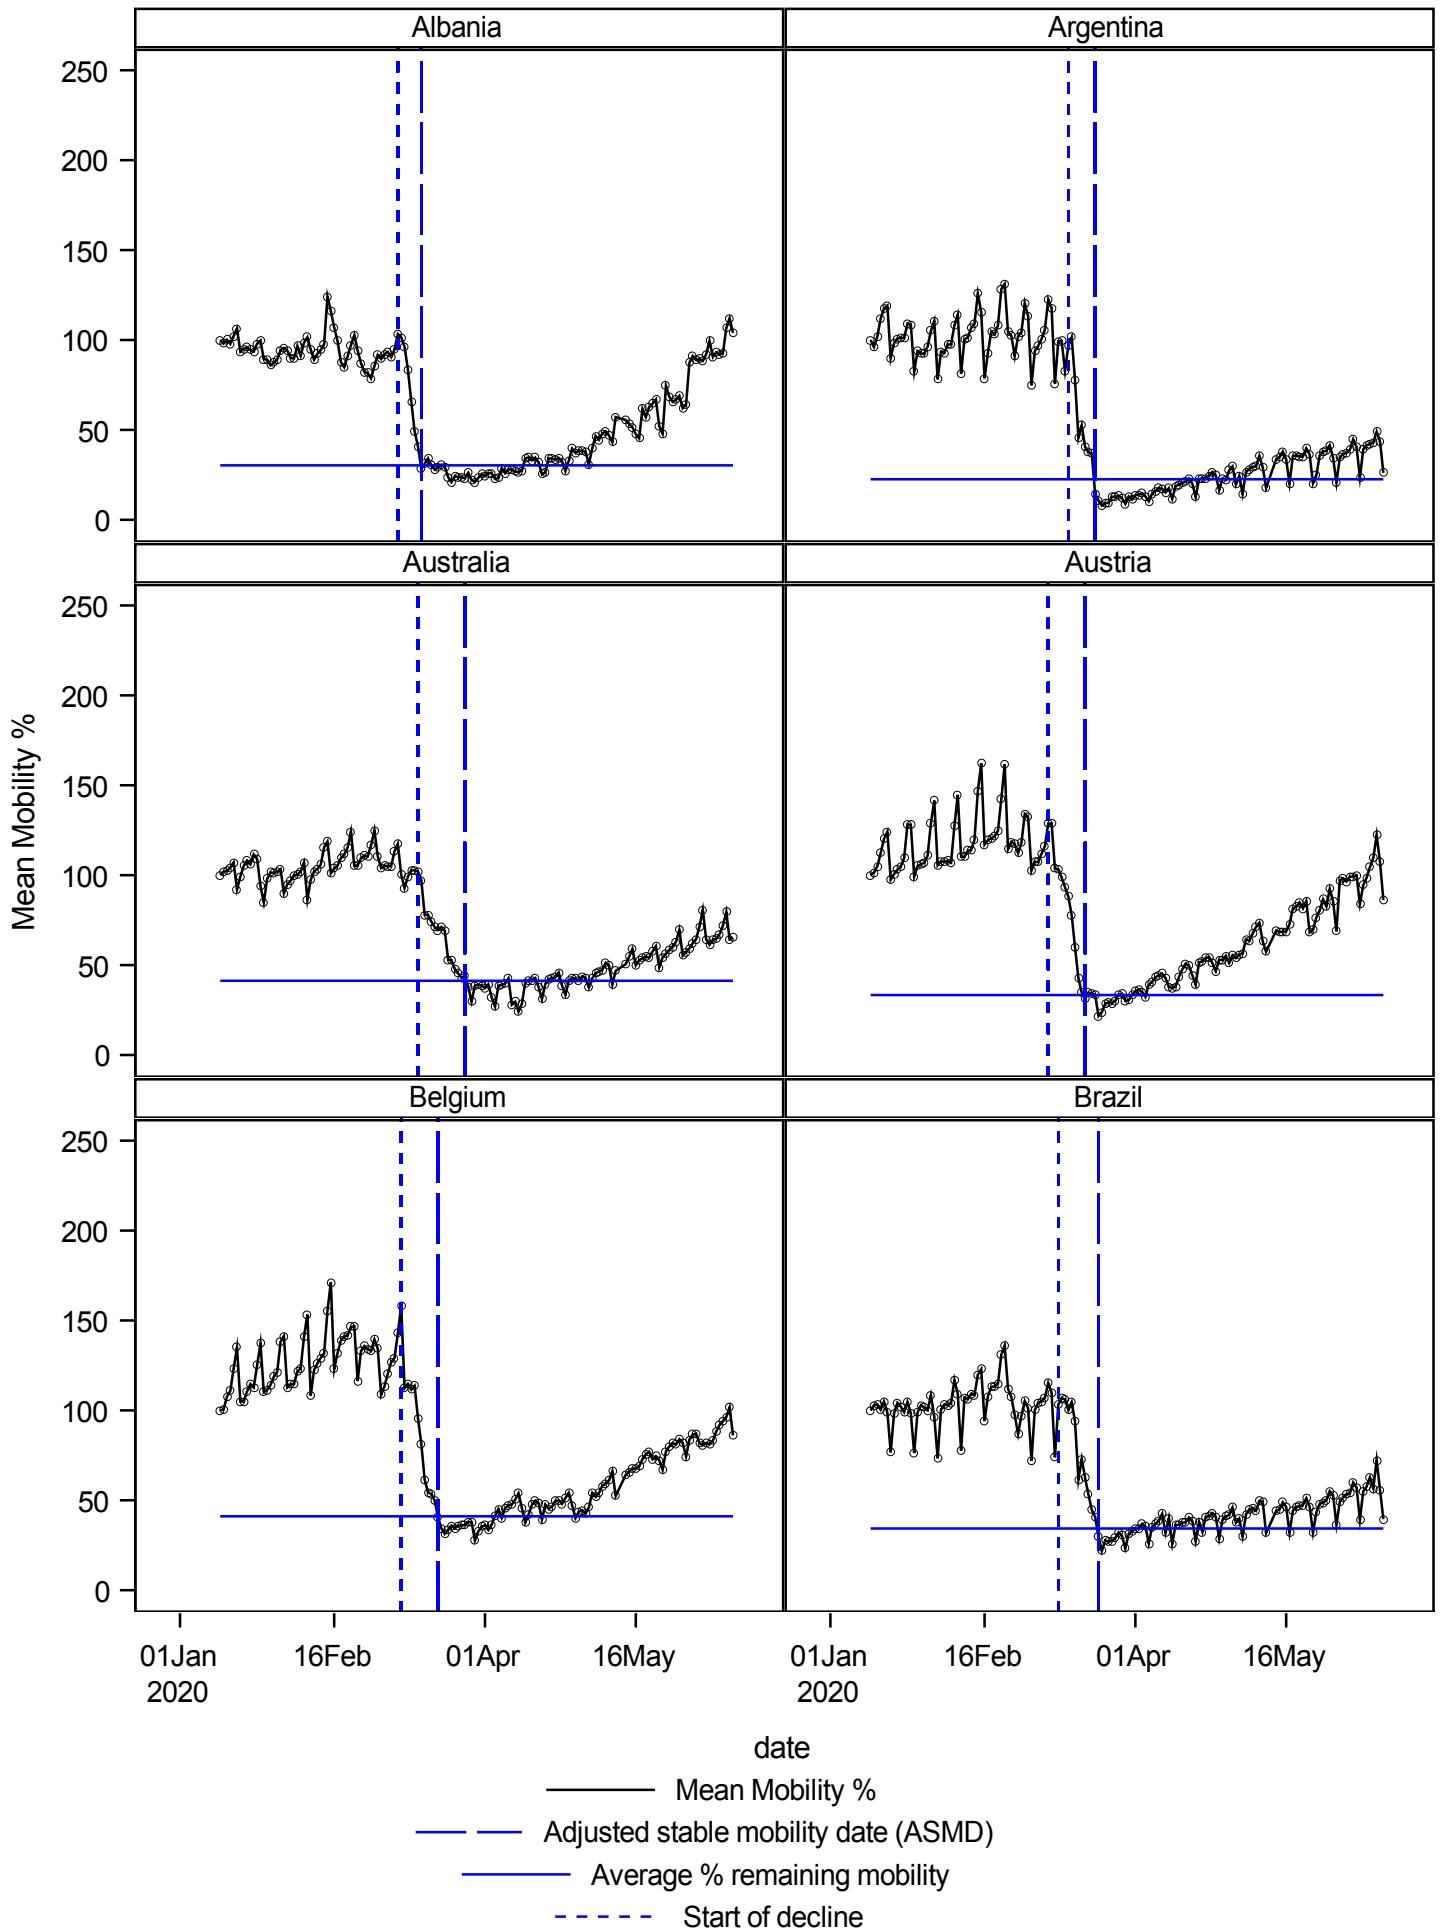

Supplementary Figures 1 Apple mobility profiles per country

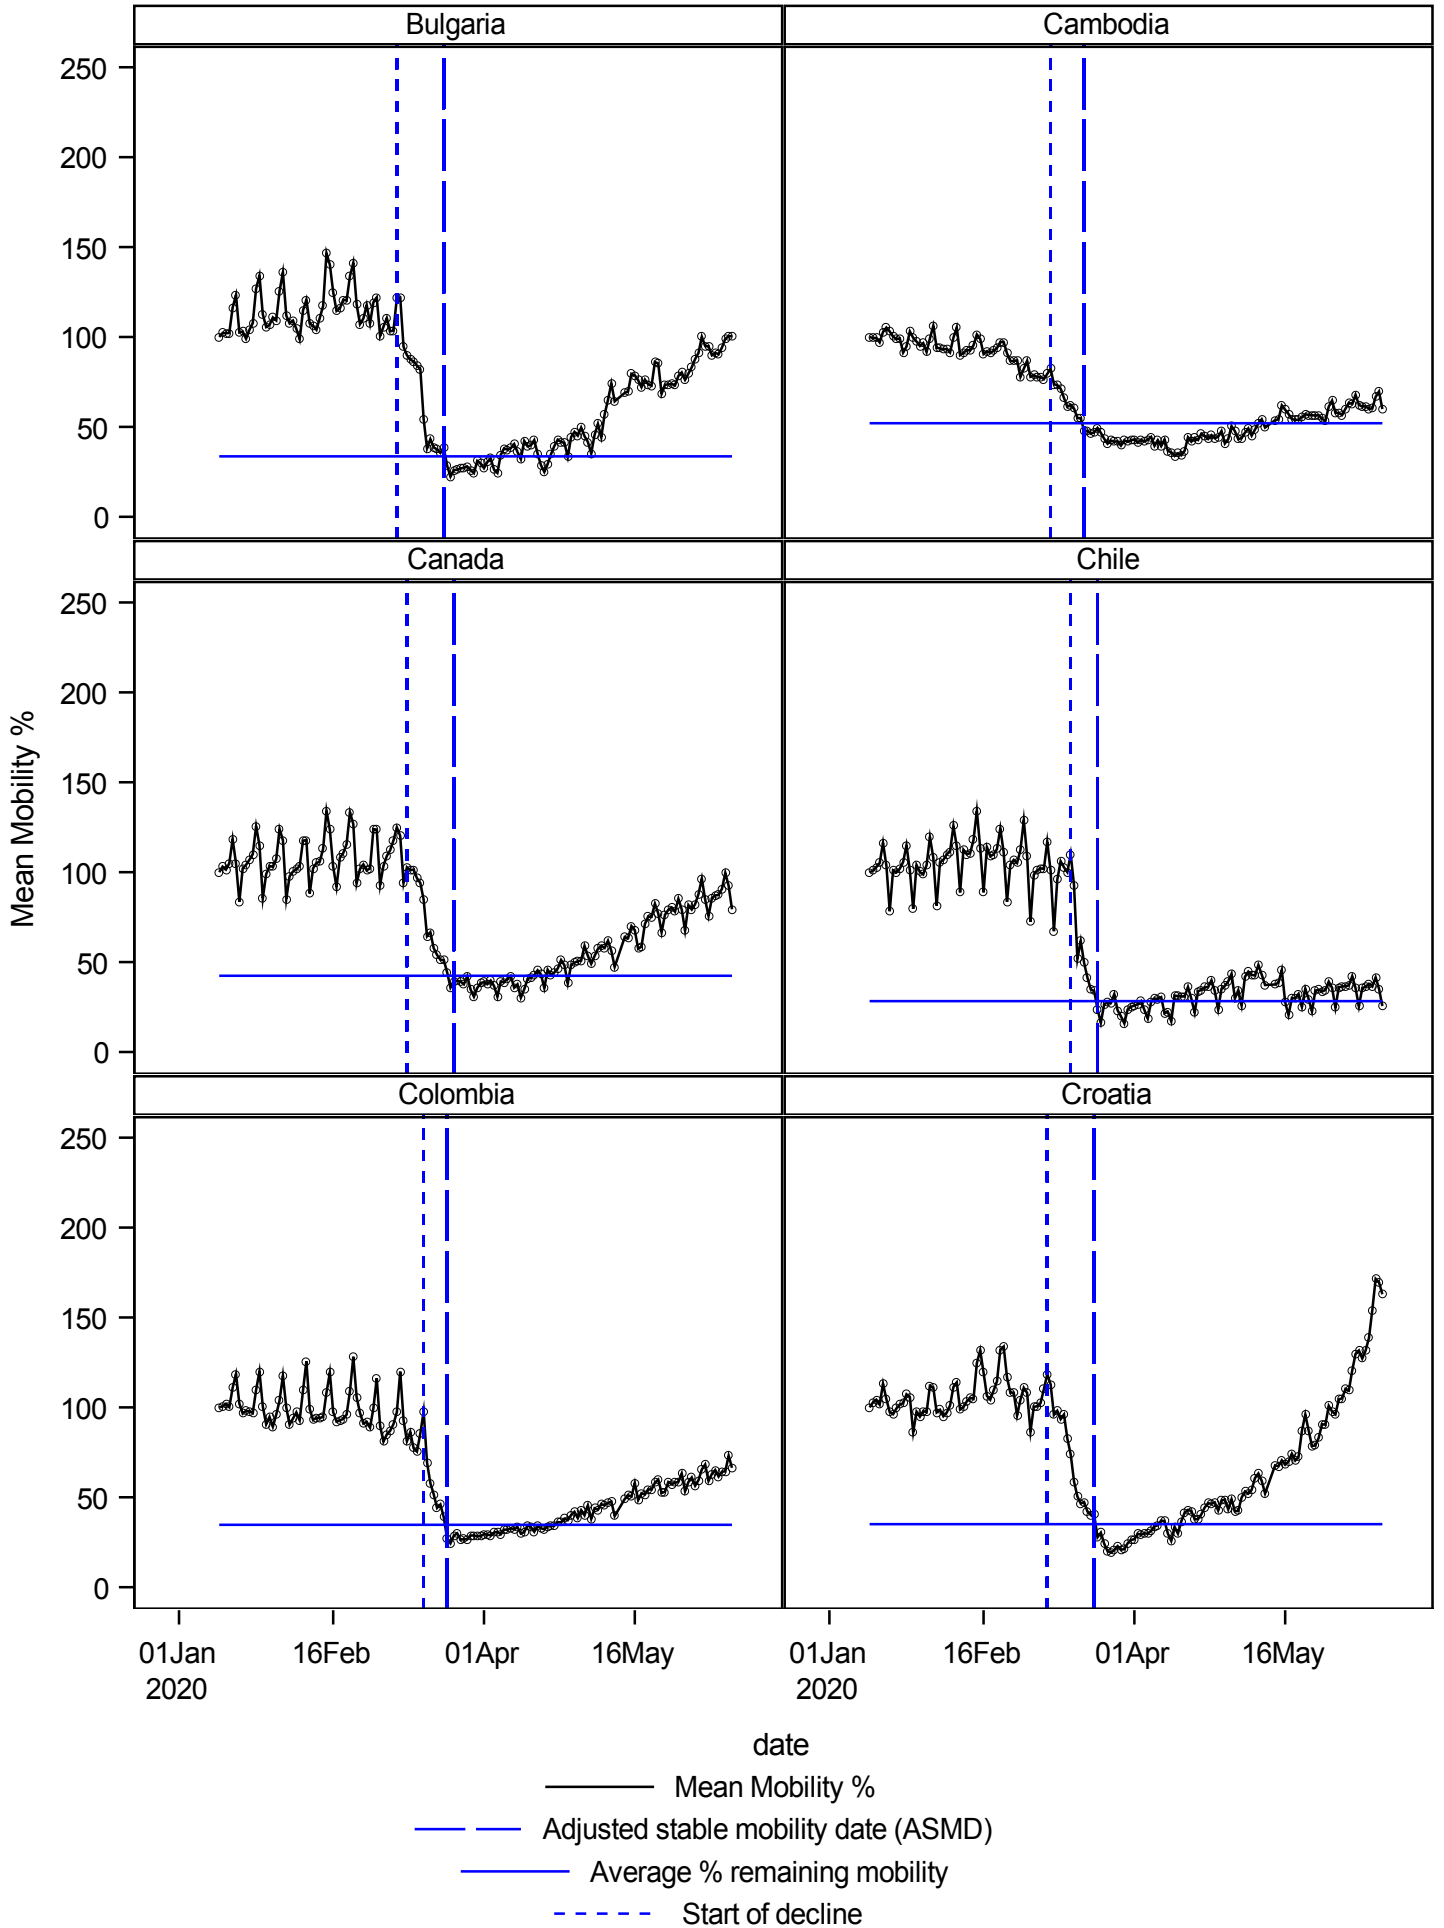

Supplementary Figures 1 Apple mobility profiles per country

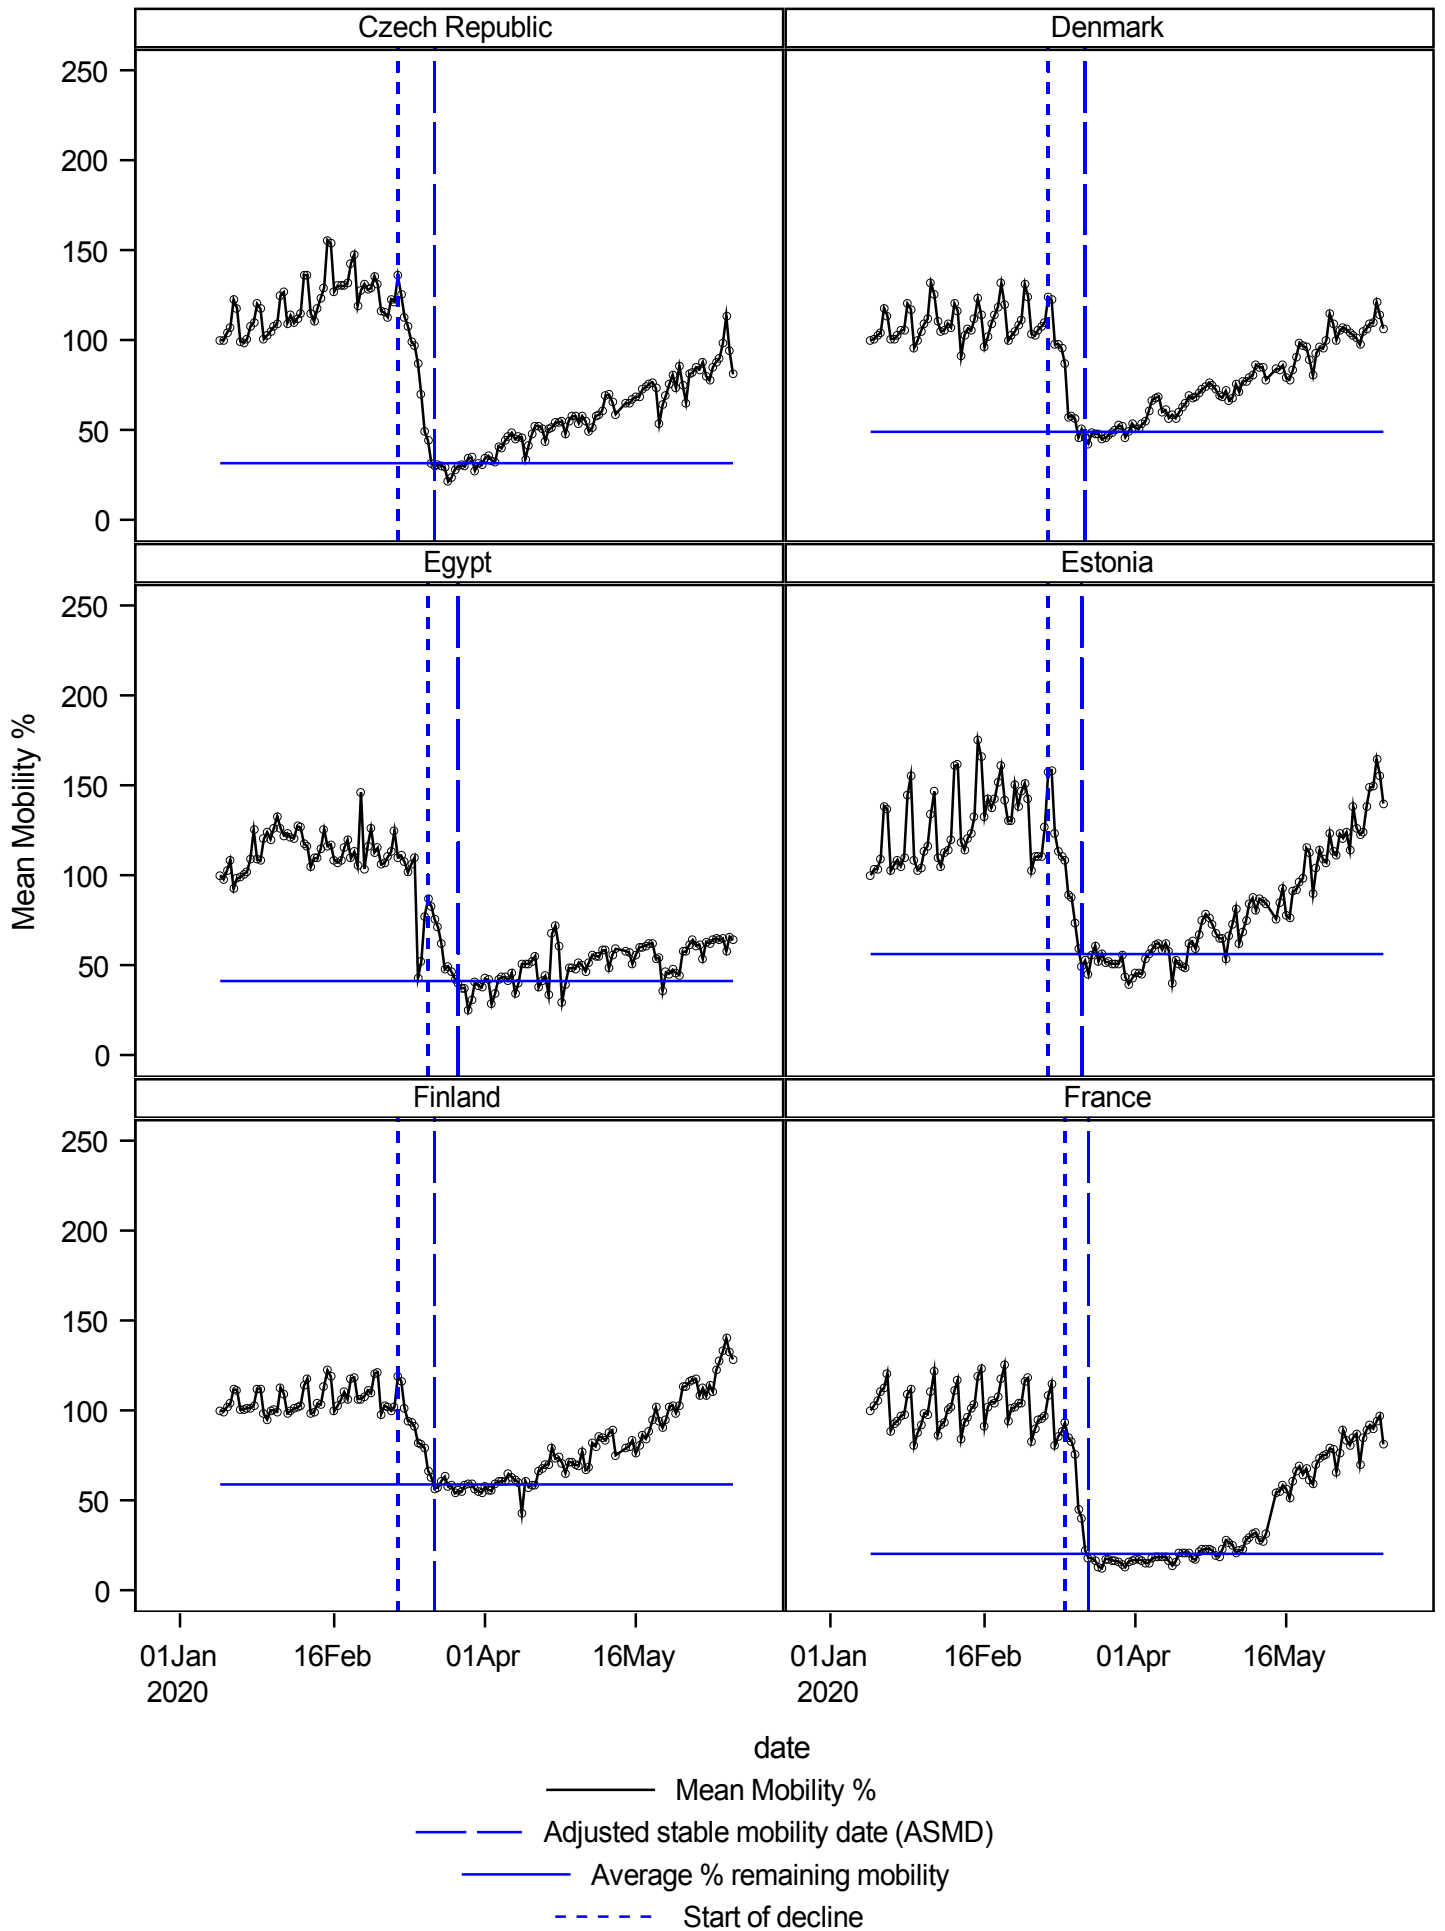

Supplementary Figures 1 Apple mobility profiles per country

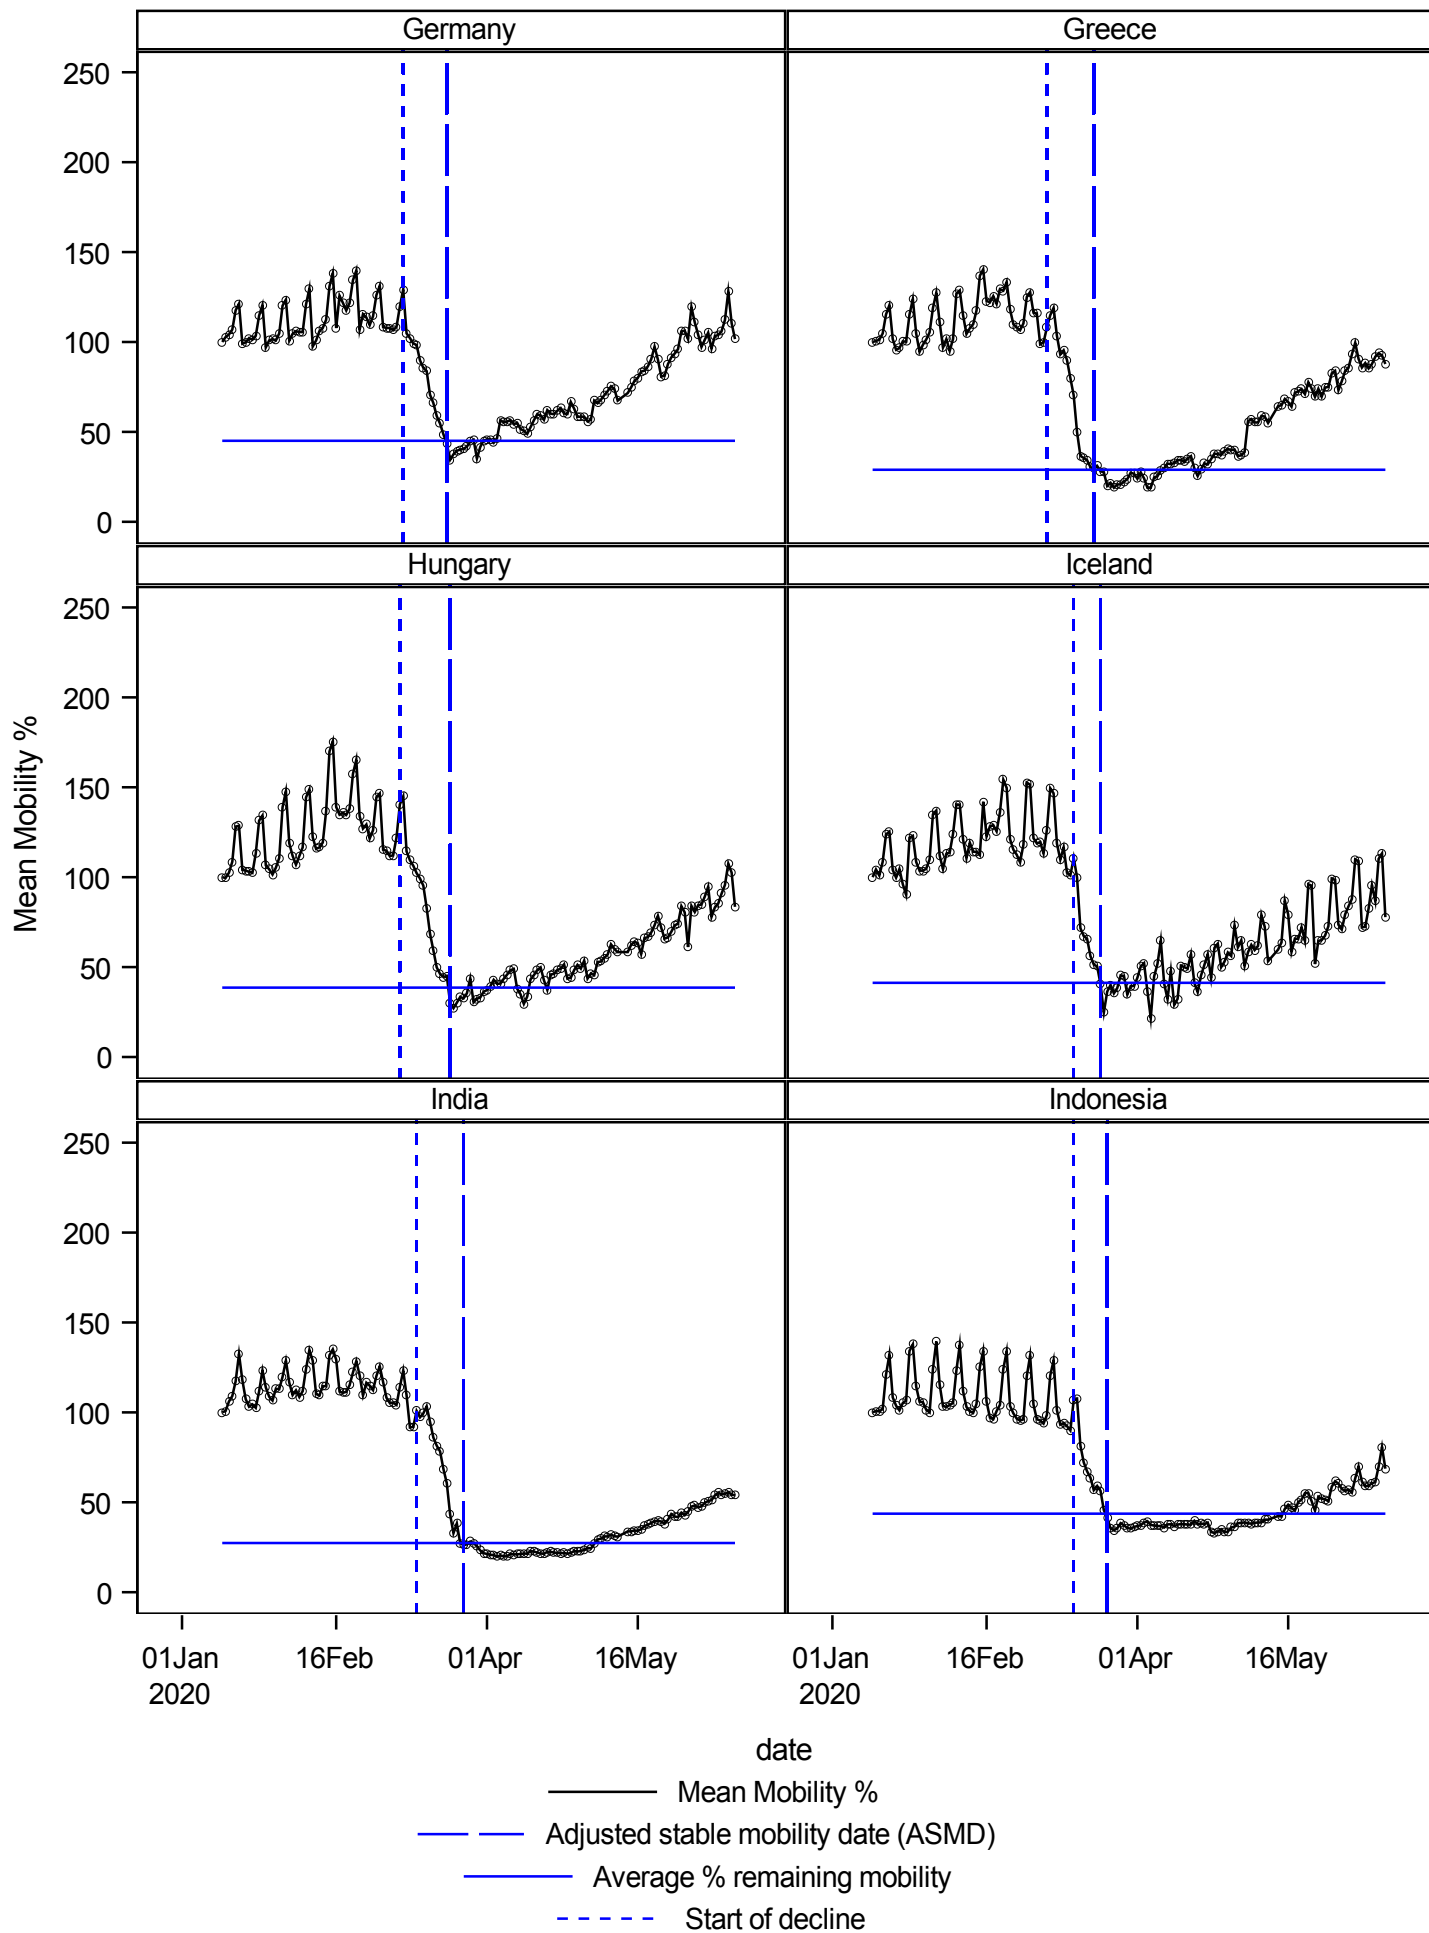

Supplementary Figures 1 Apple mobility profiles per country

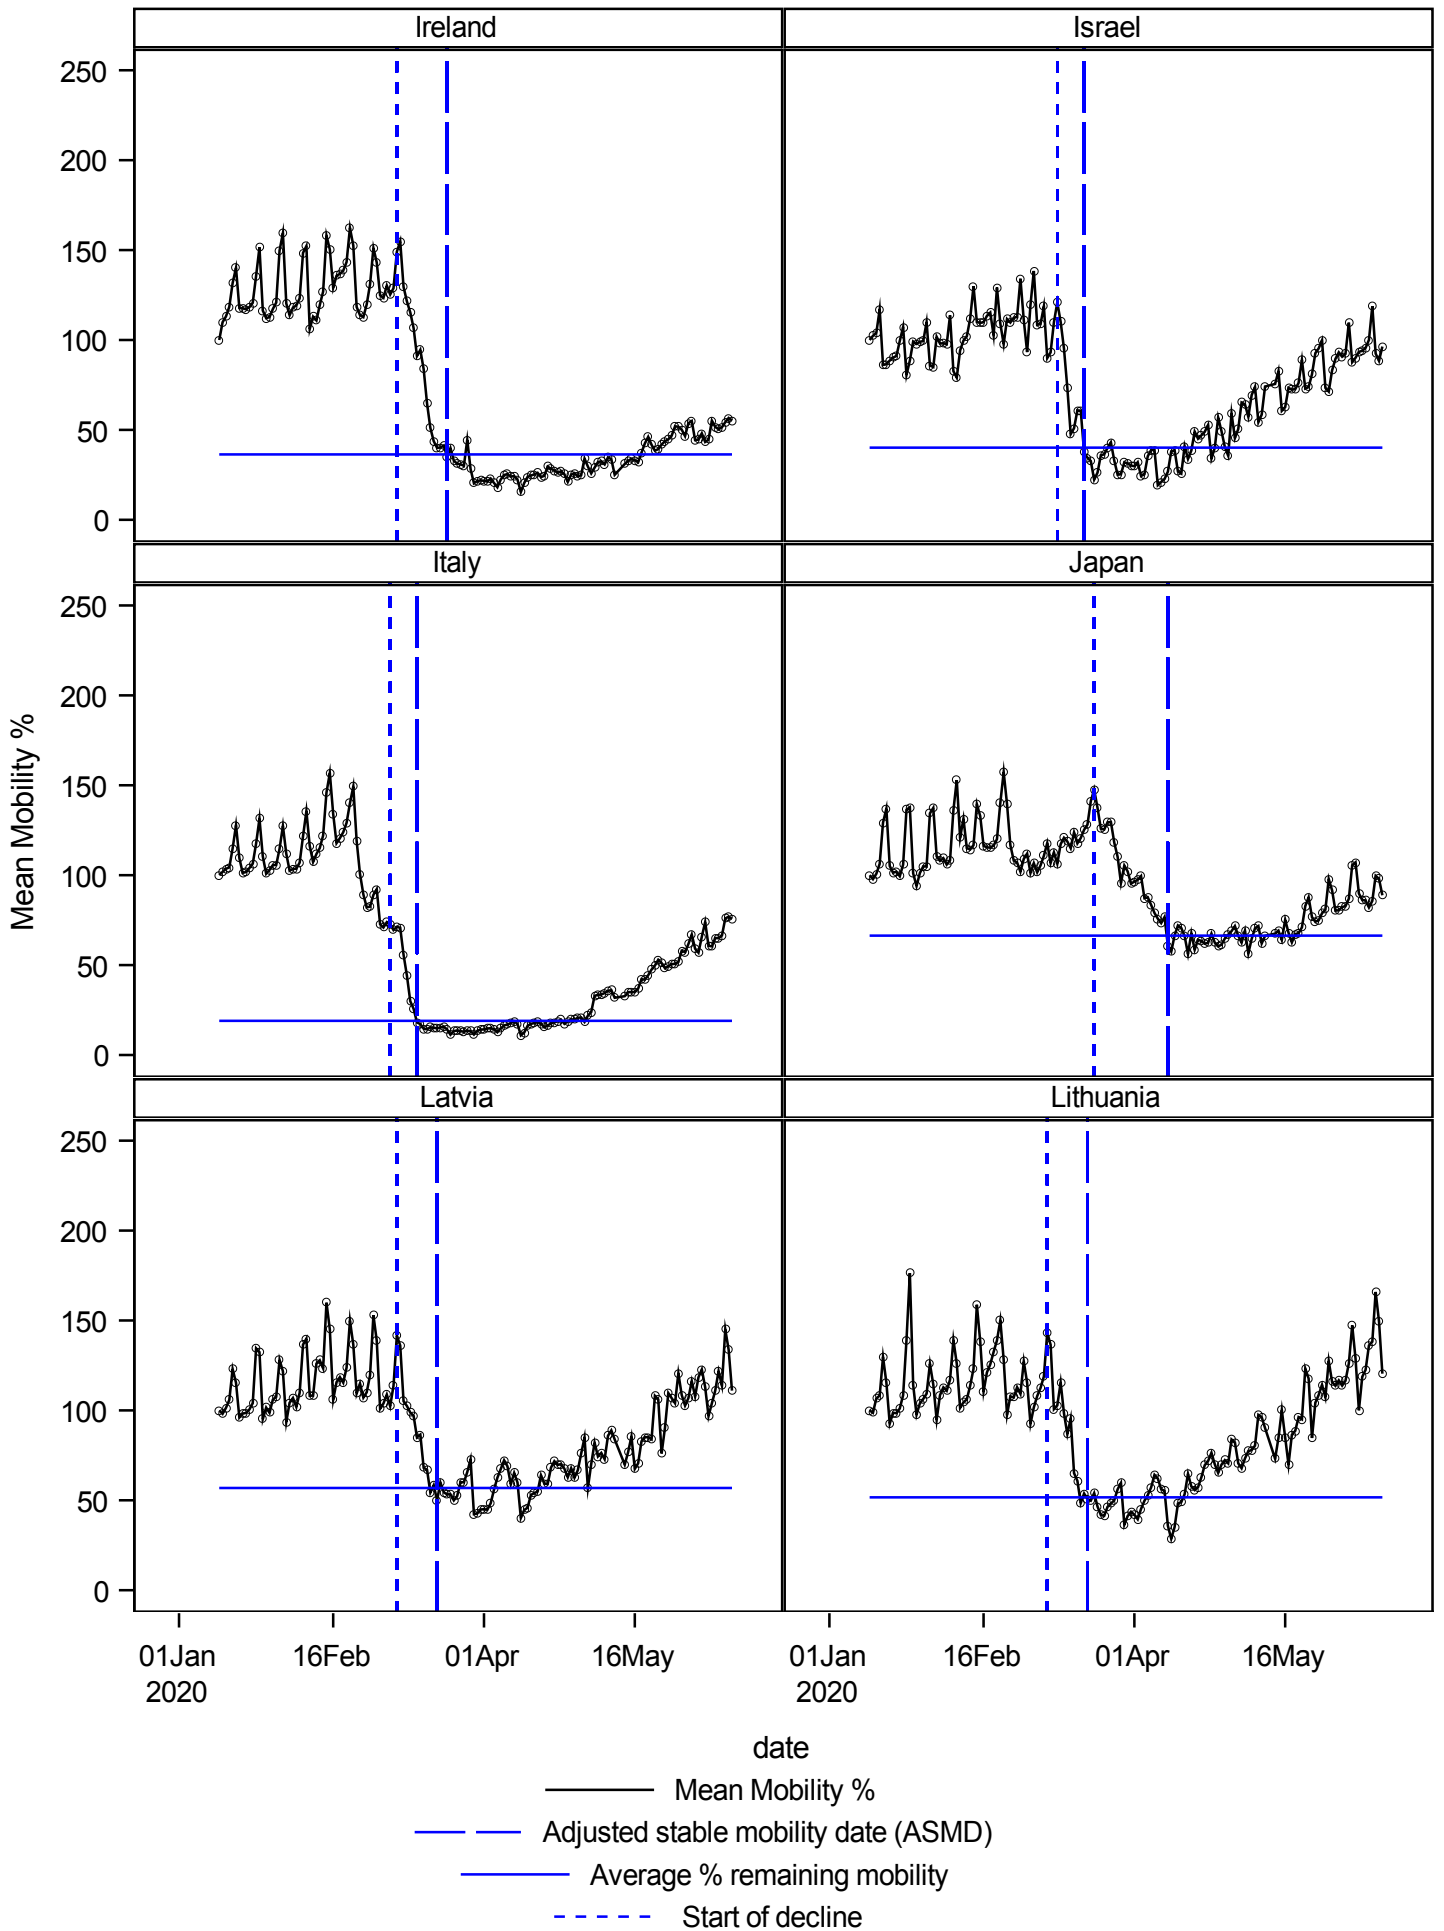

Supplementary Figures 1 Apple mobility profiles per country

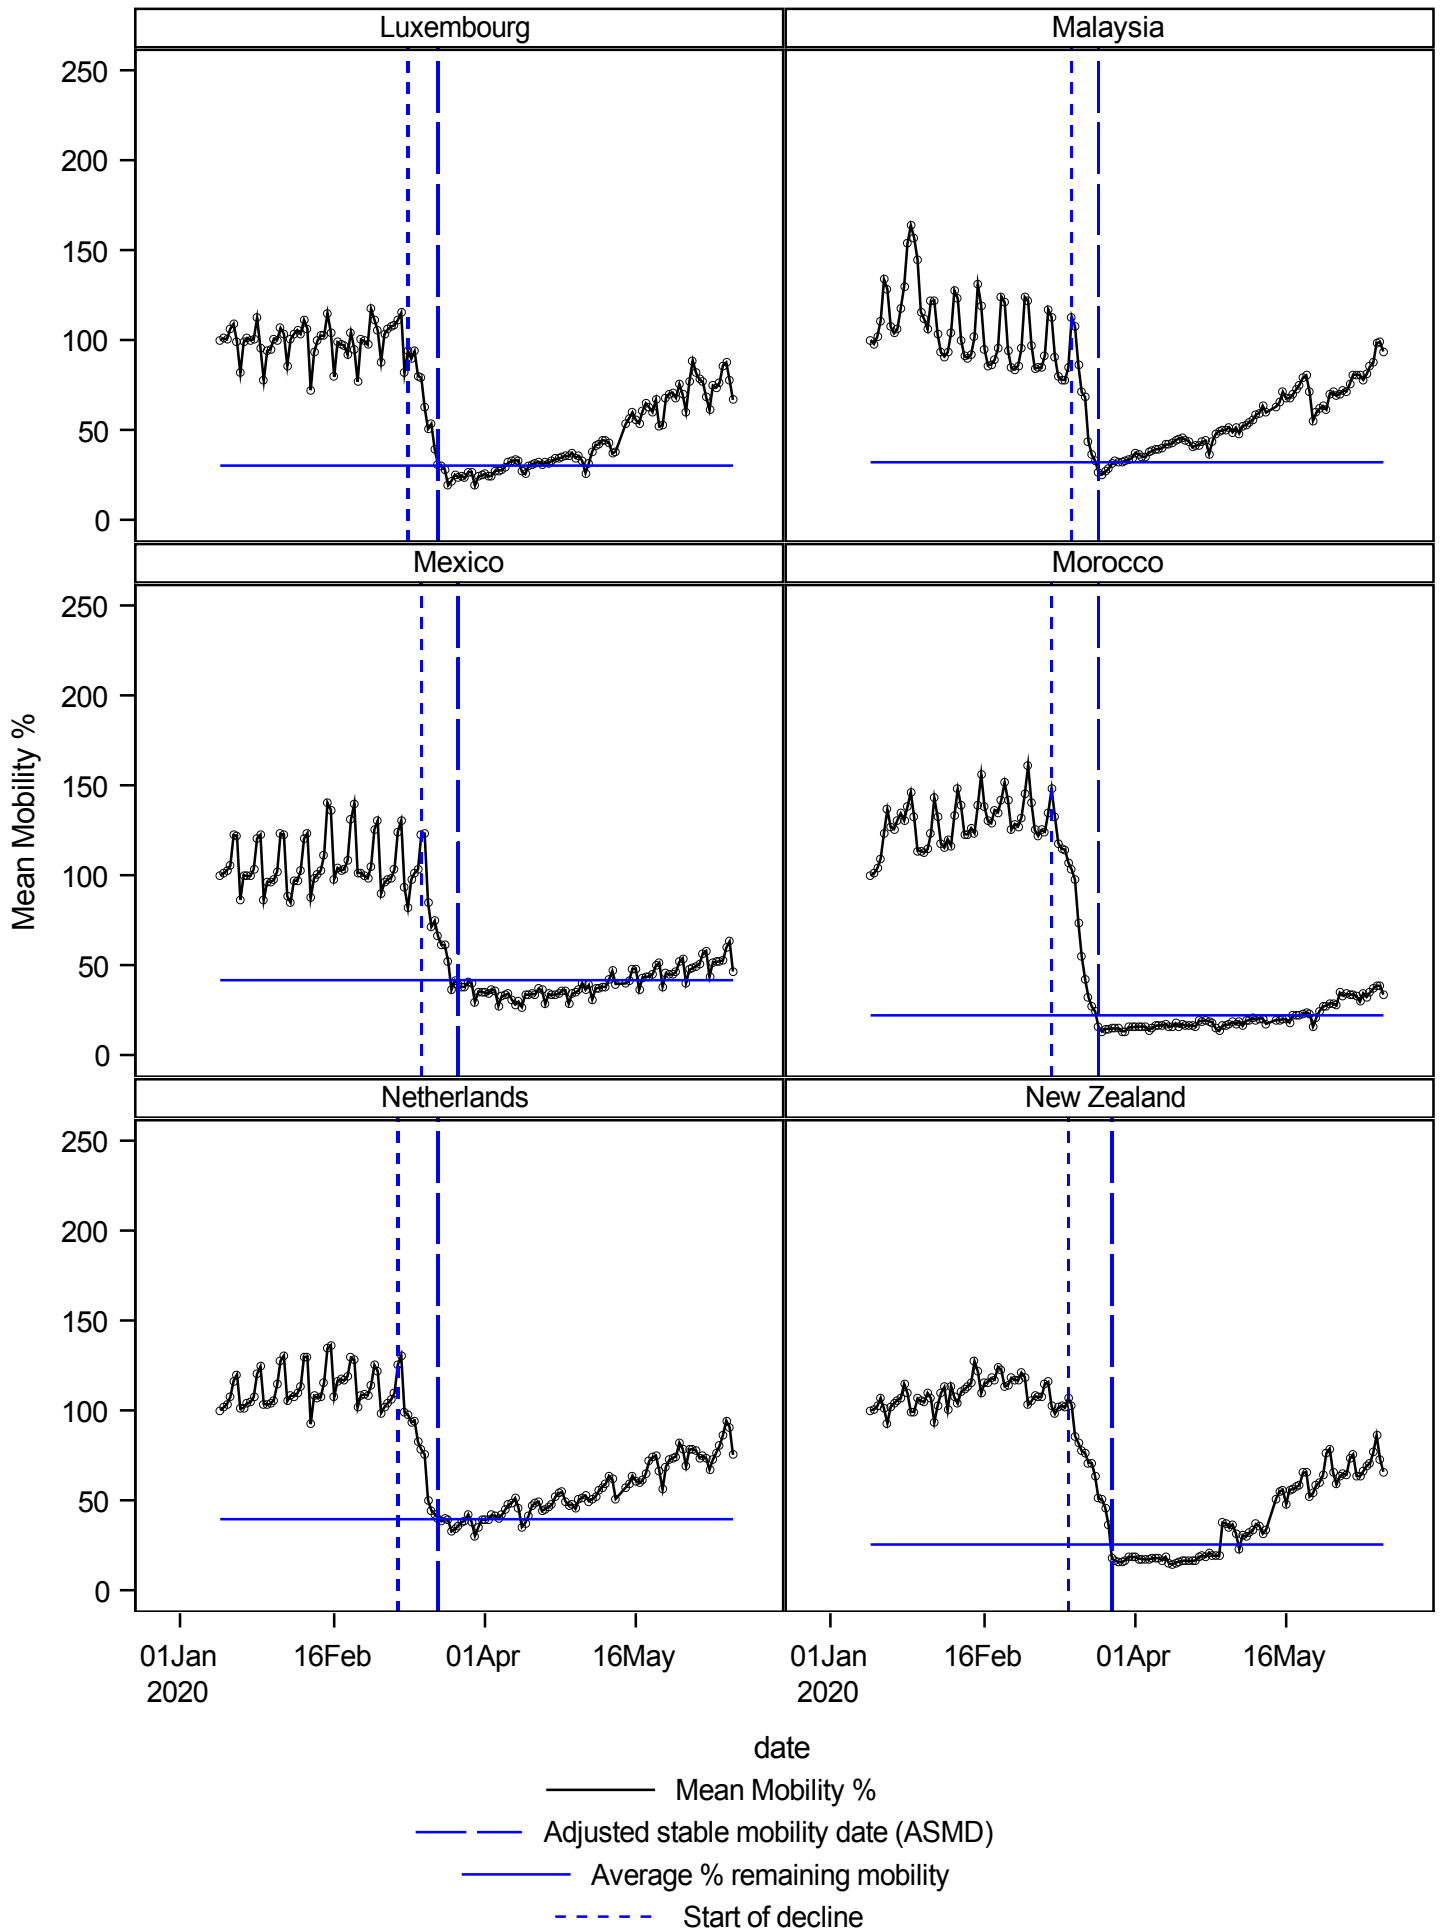

Supplementary Figures 1 Apple mobility profiles per country

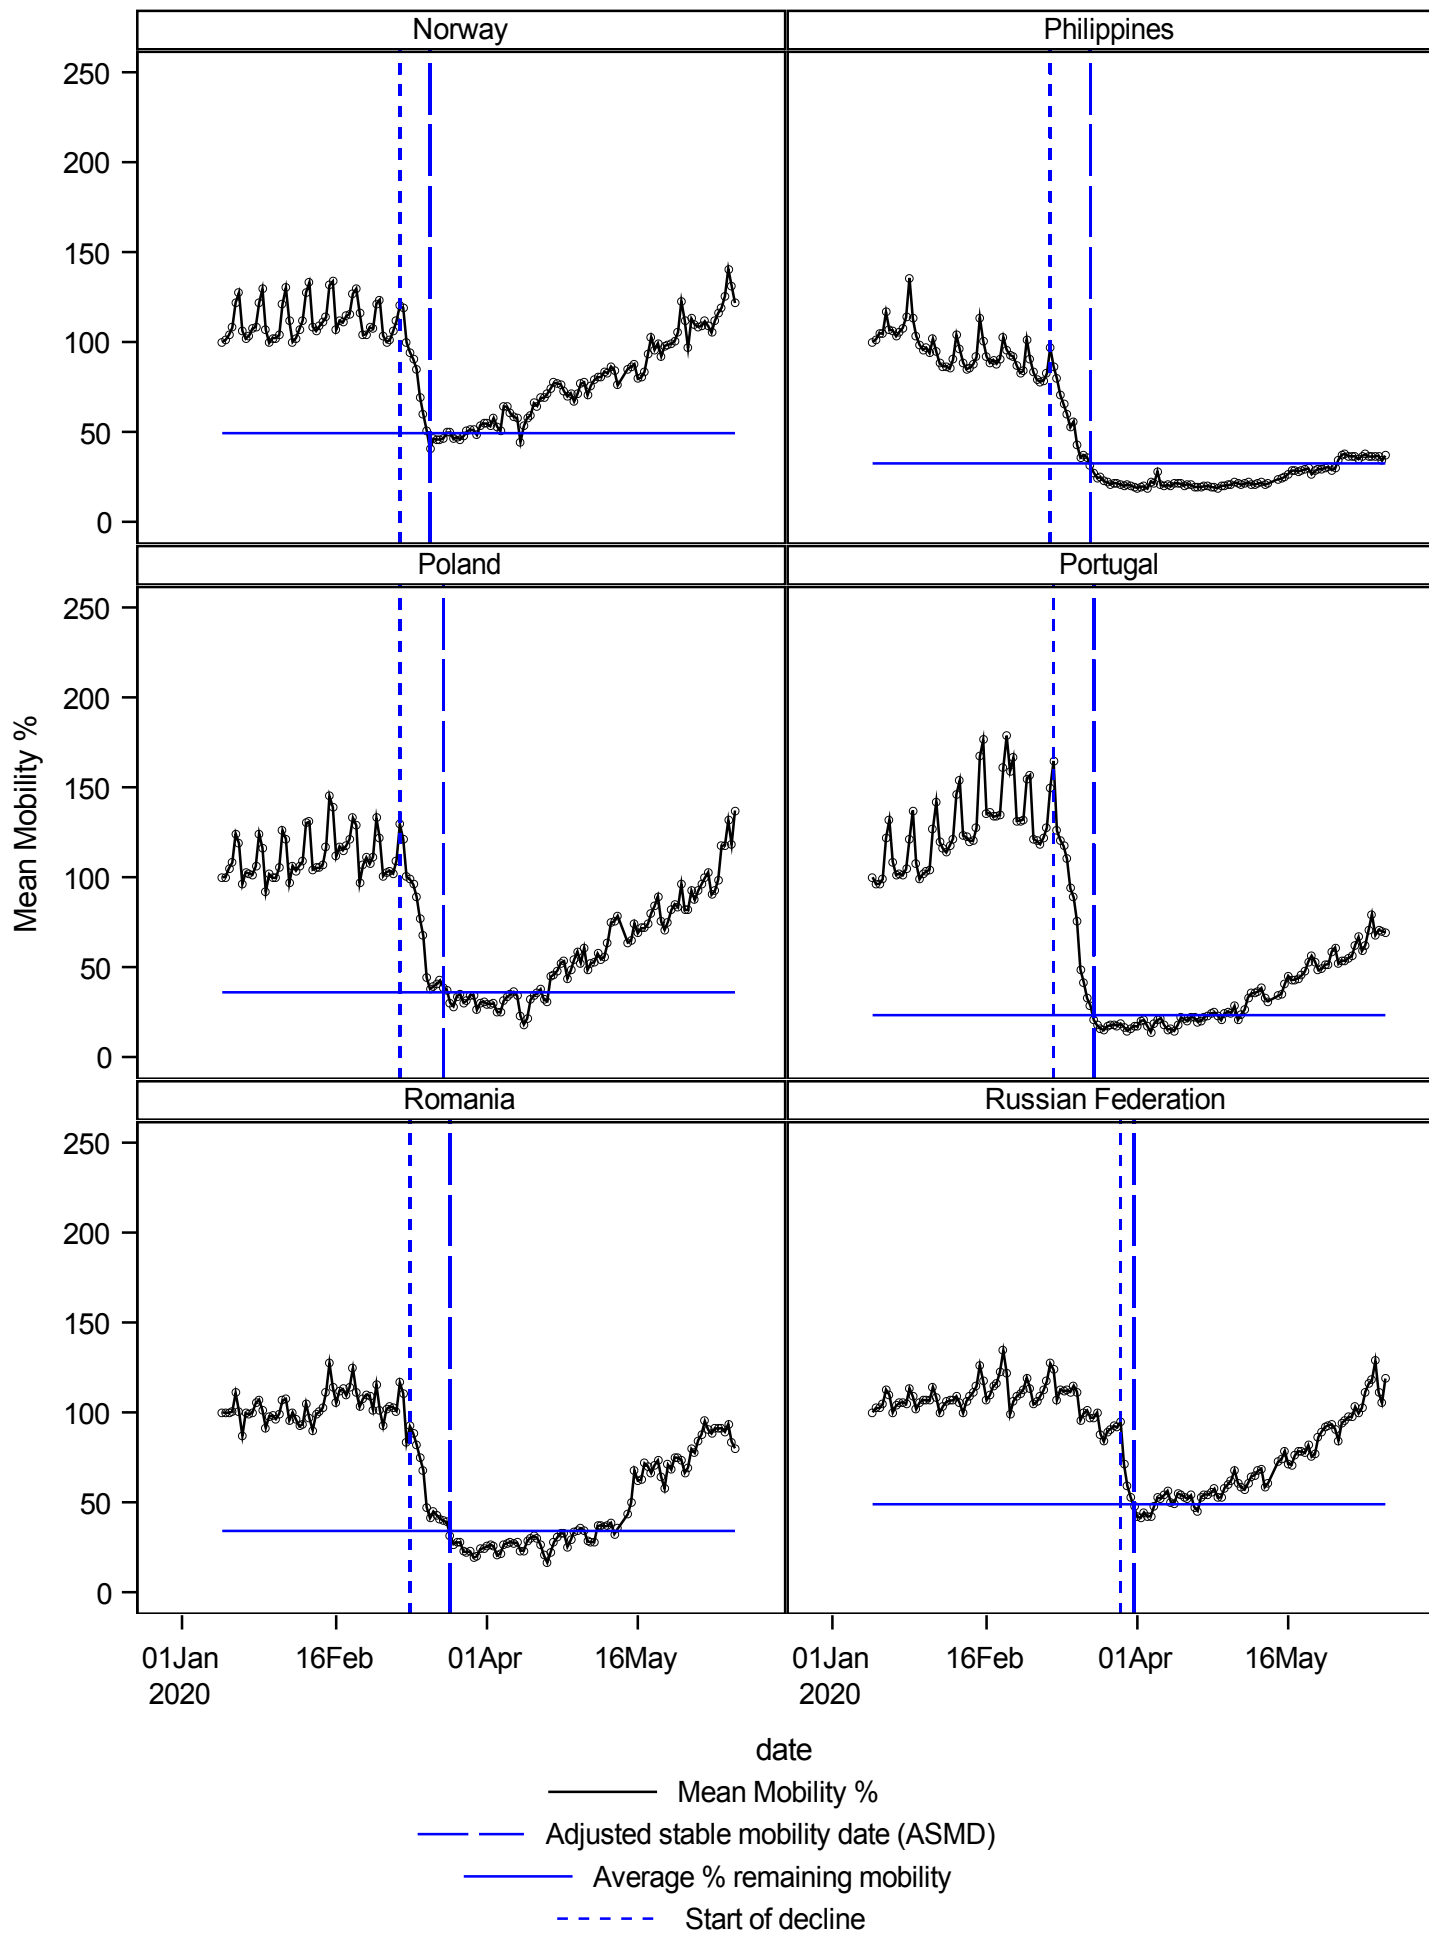

Supplementary Figures 1 Apple mobility profiles per country

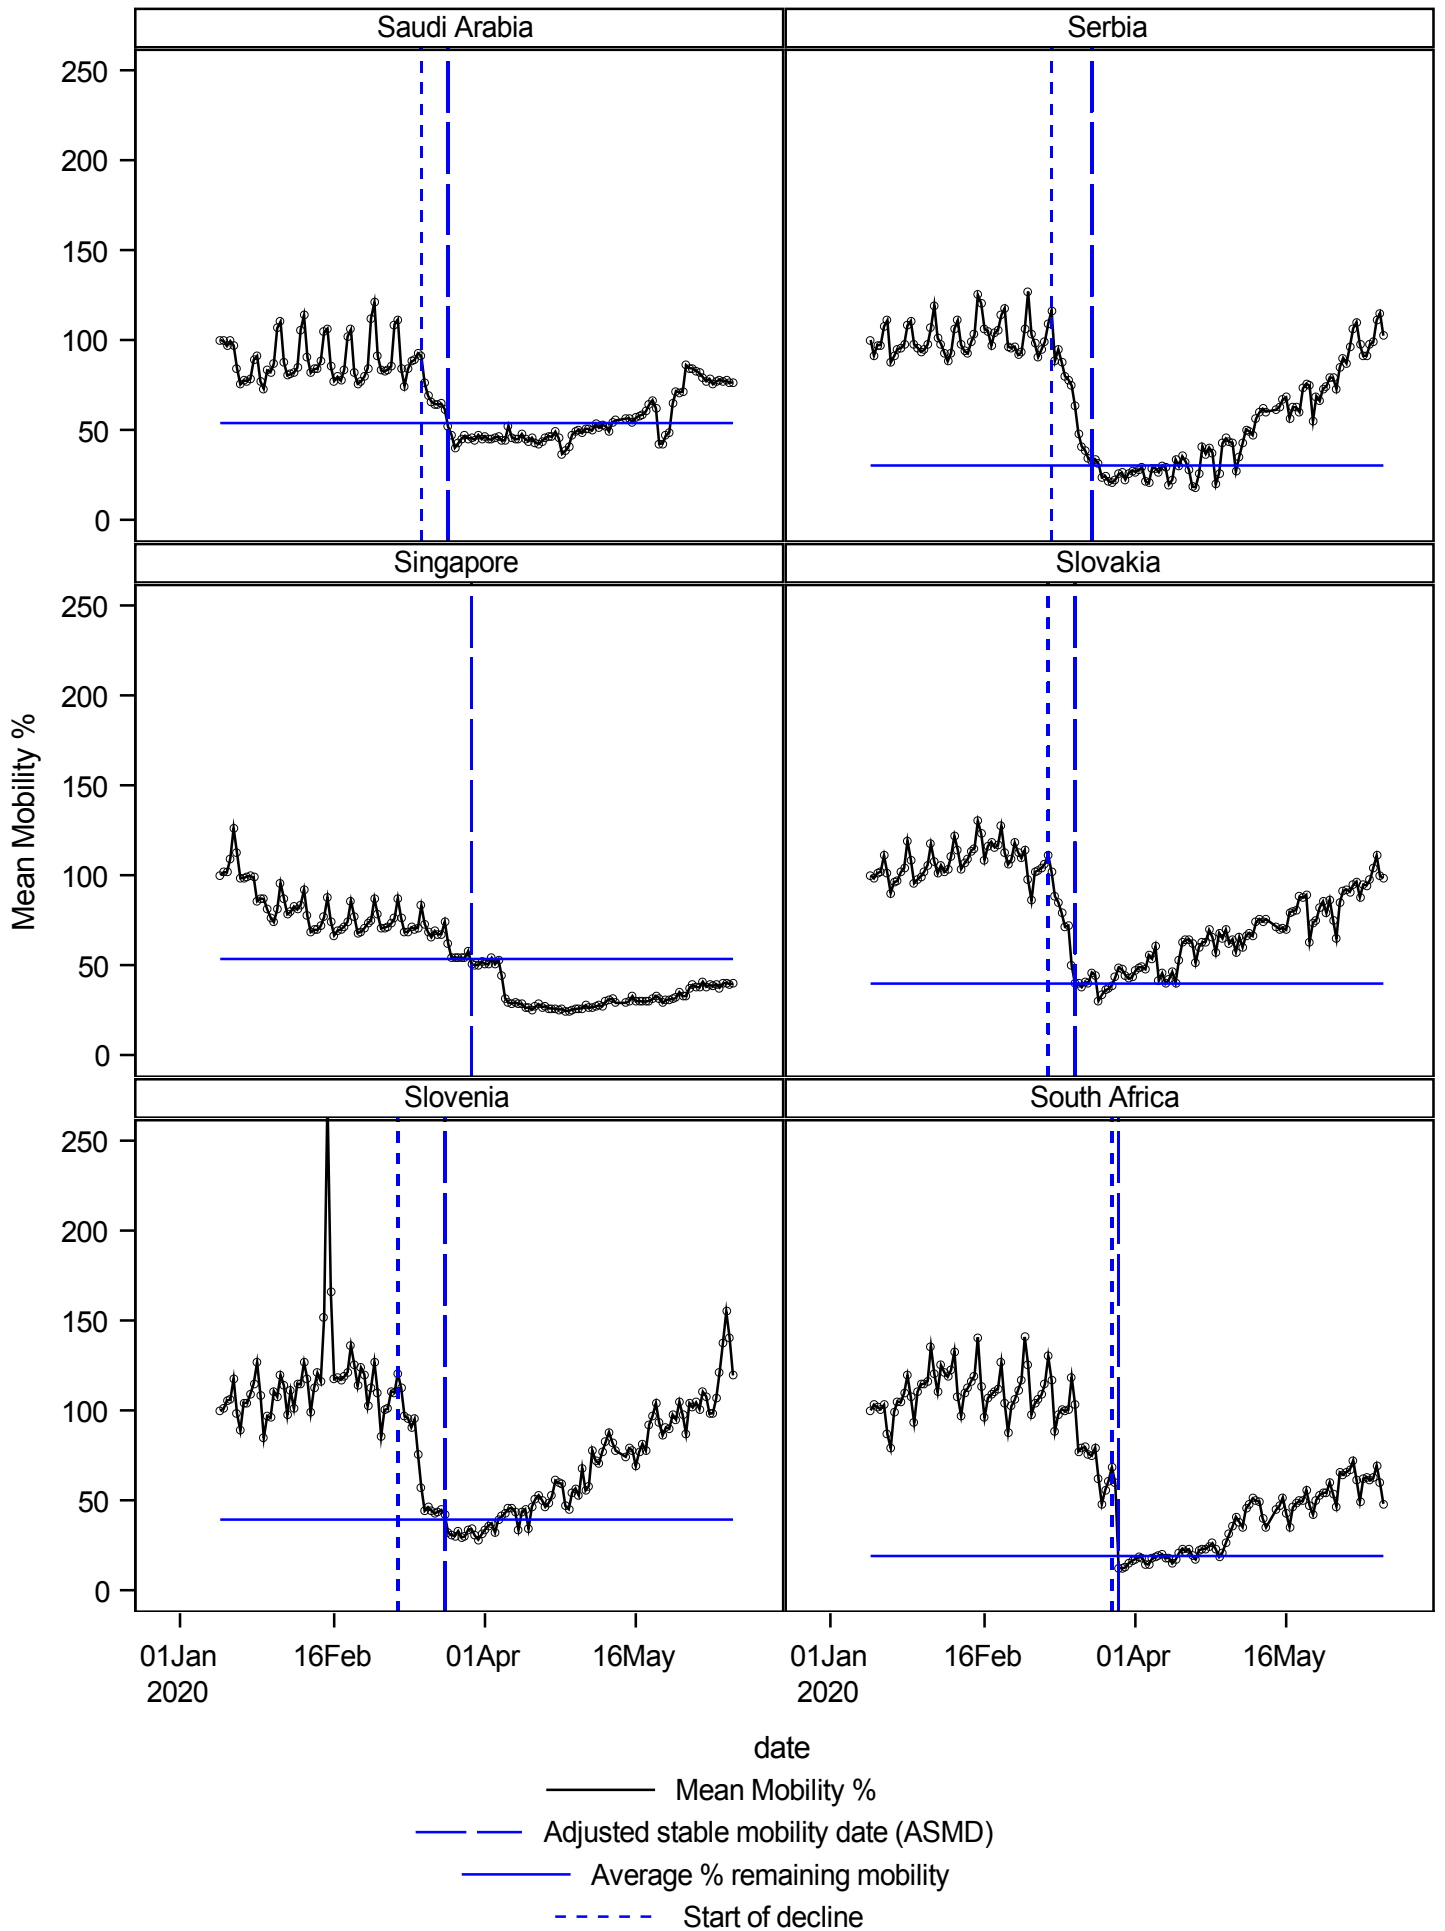



Supplementary Figures 1 Apple mobility profiles per country

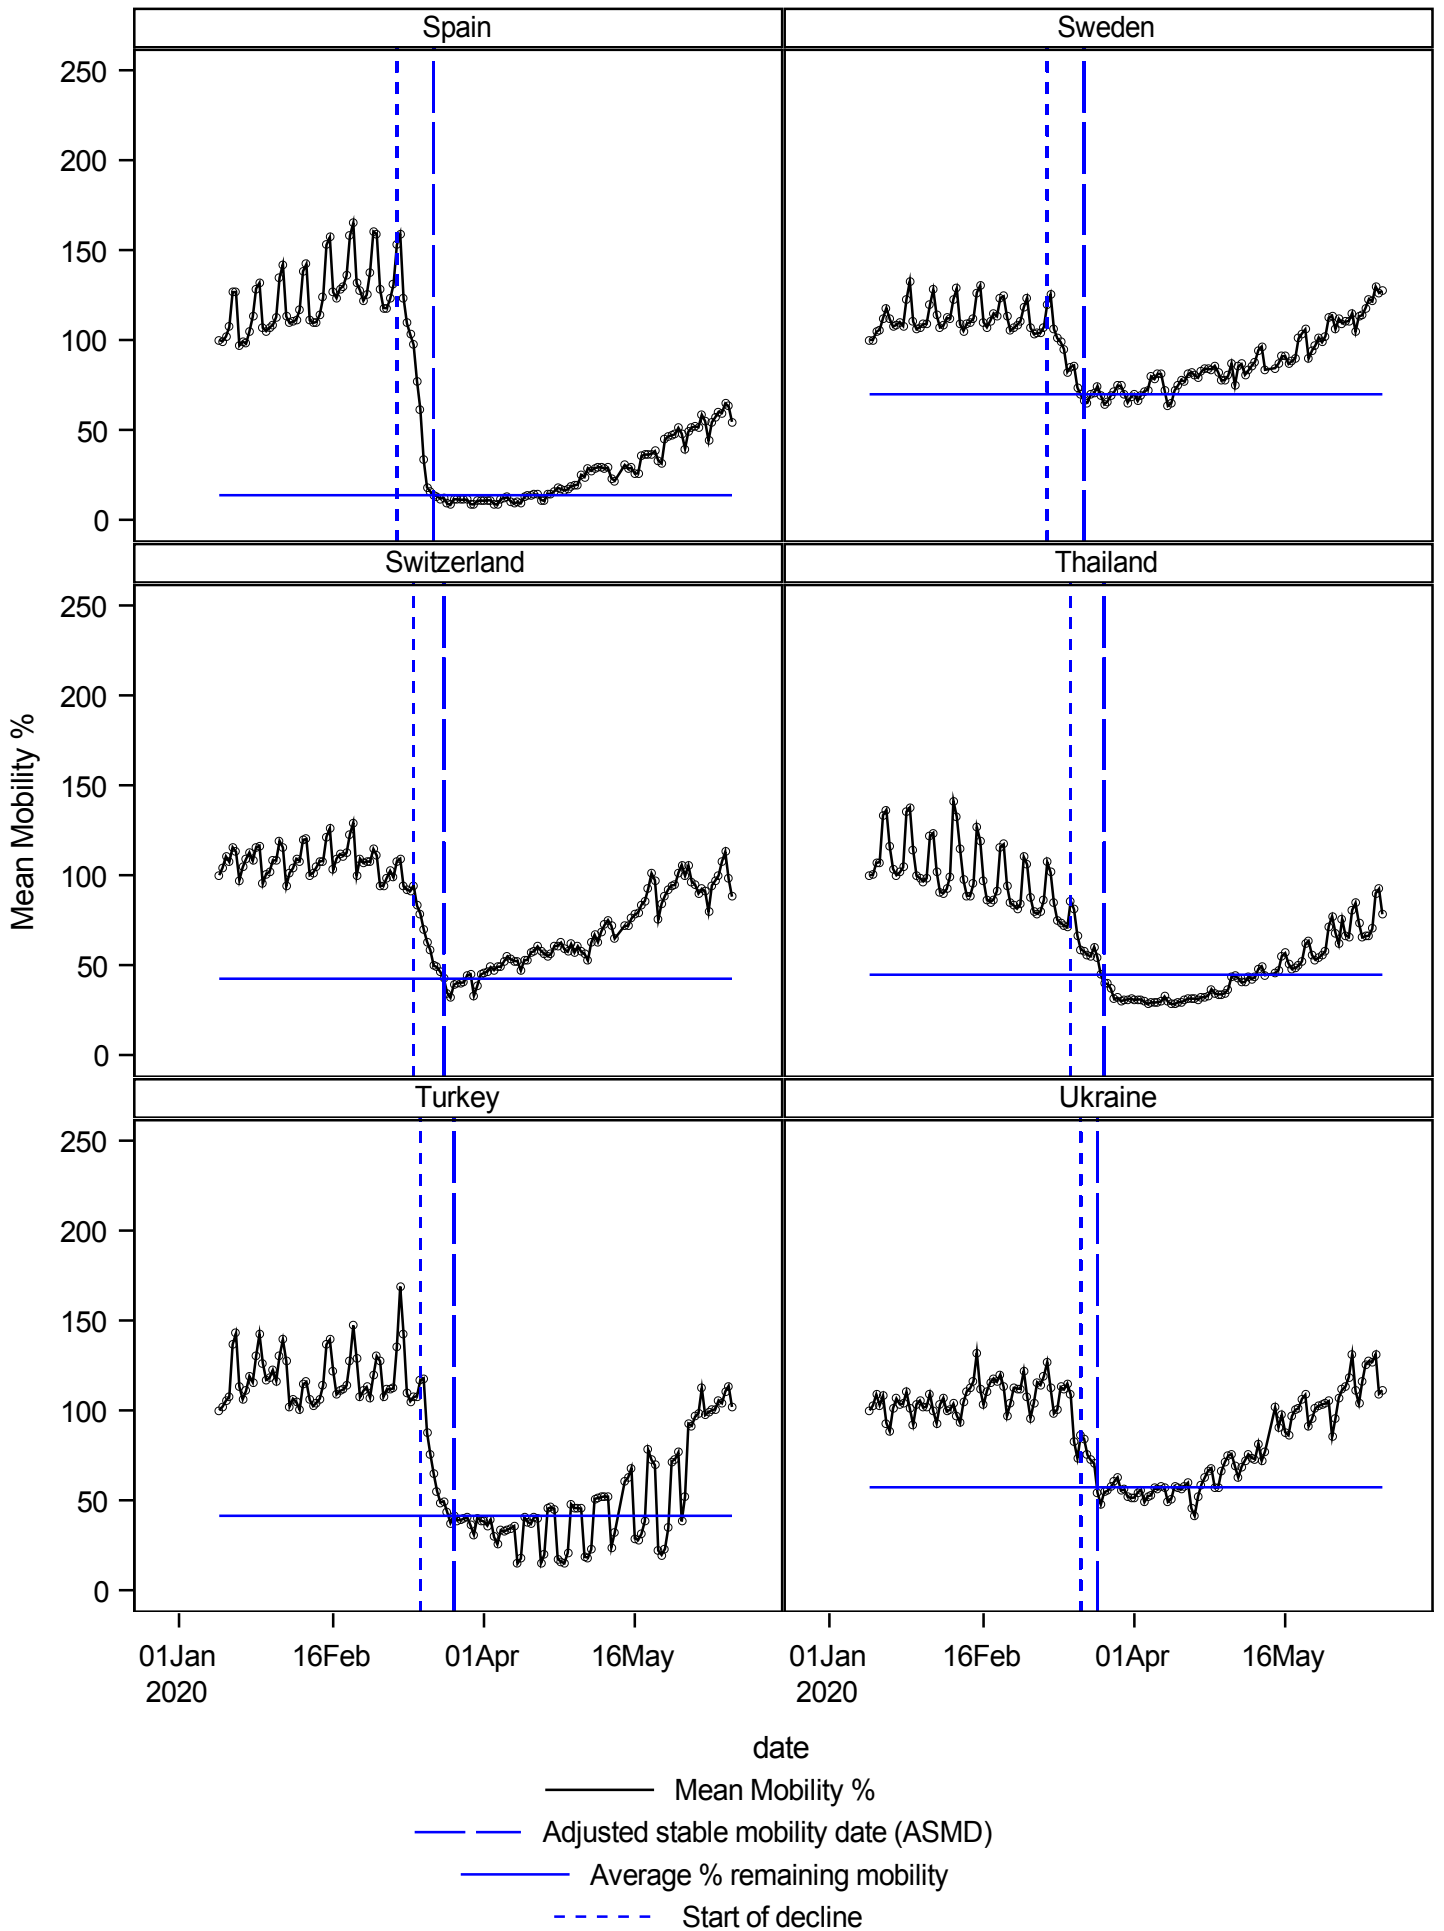

Supplementary Figures 1 Apple mobility profiles per country

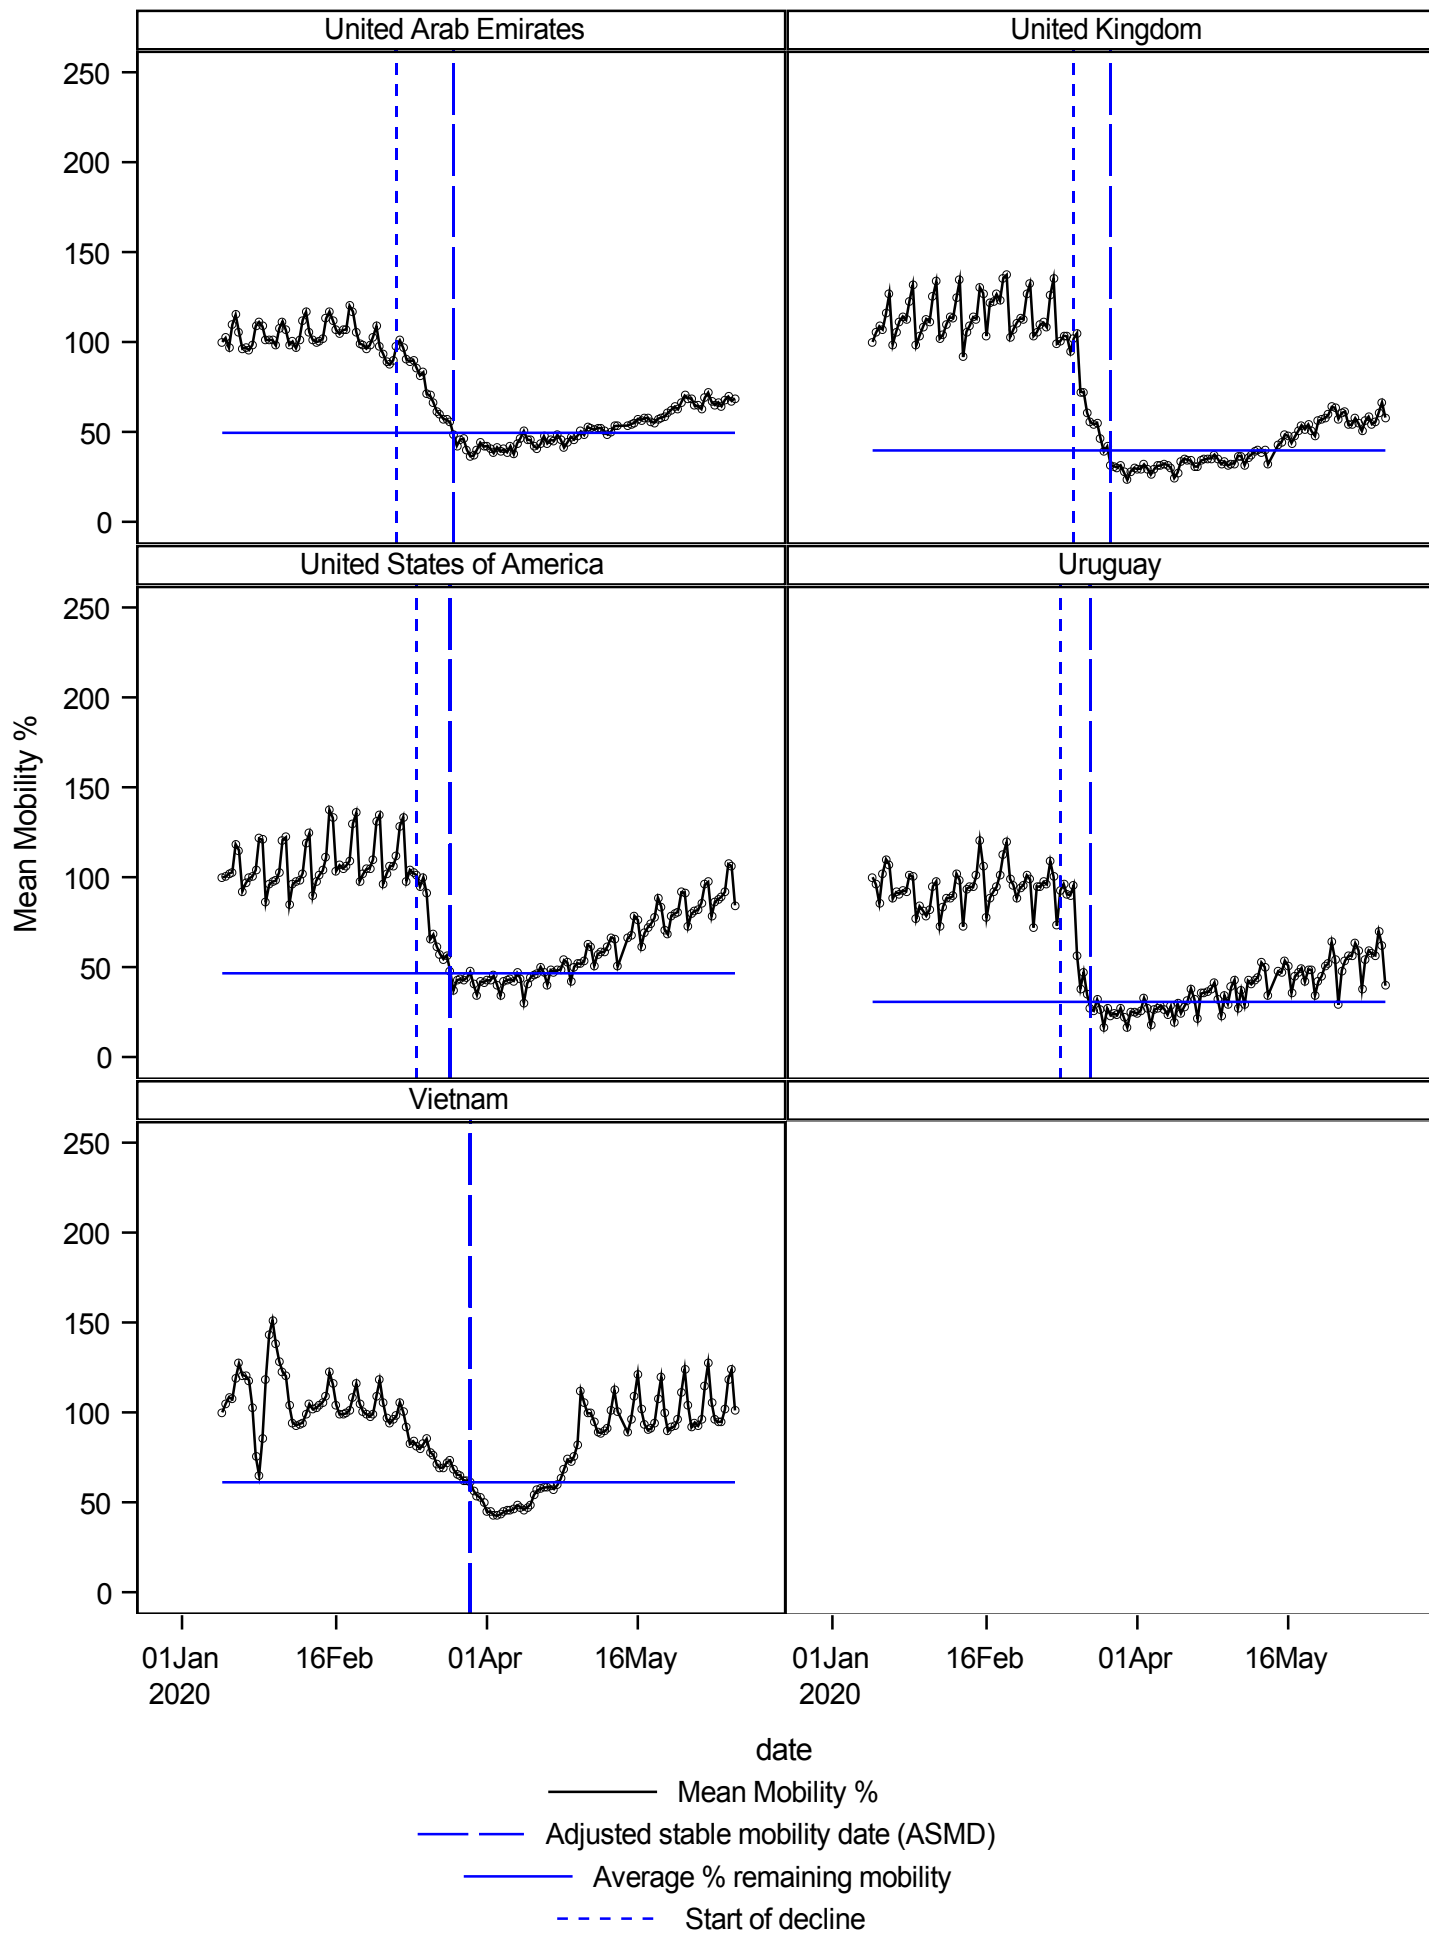

Supplementary Figures 2 Google RAR mobility profiles per country

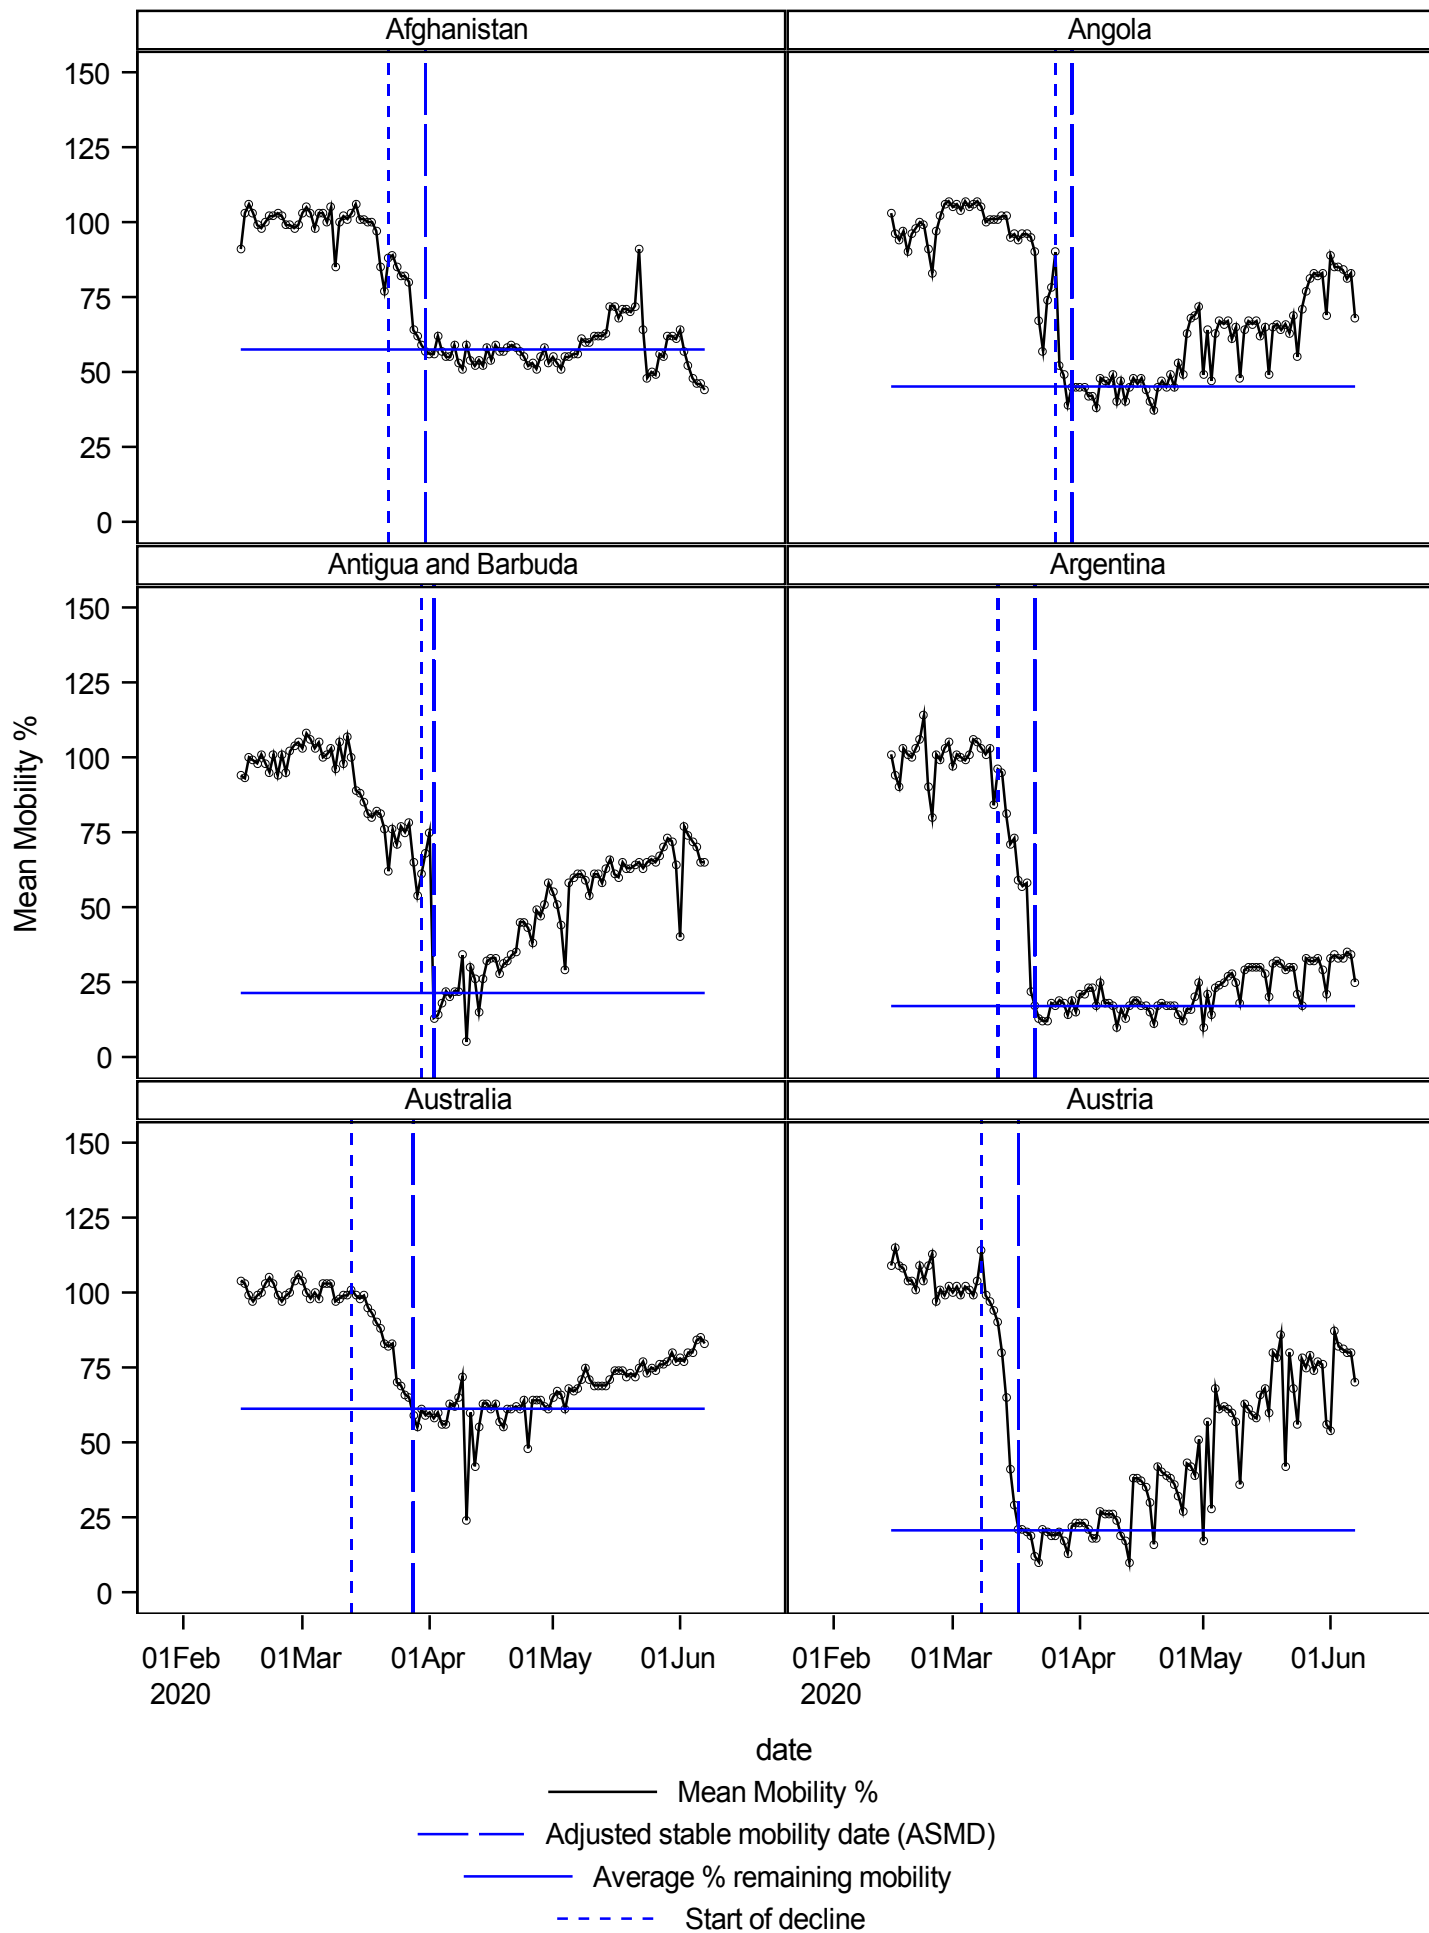

Supplementary Figures 2 Google RAR mobility profiles per country

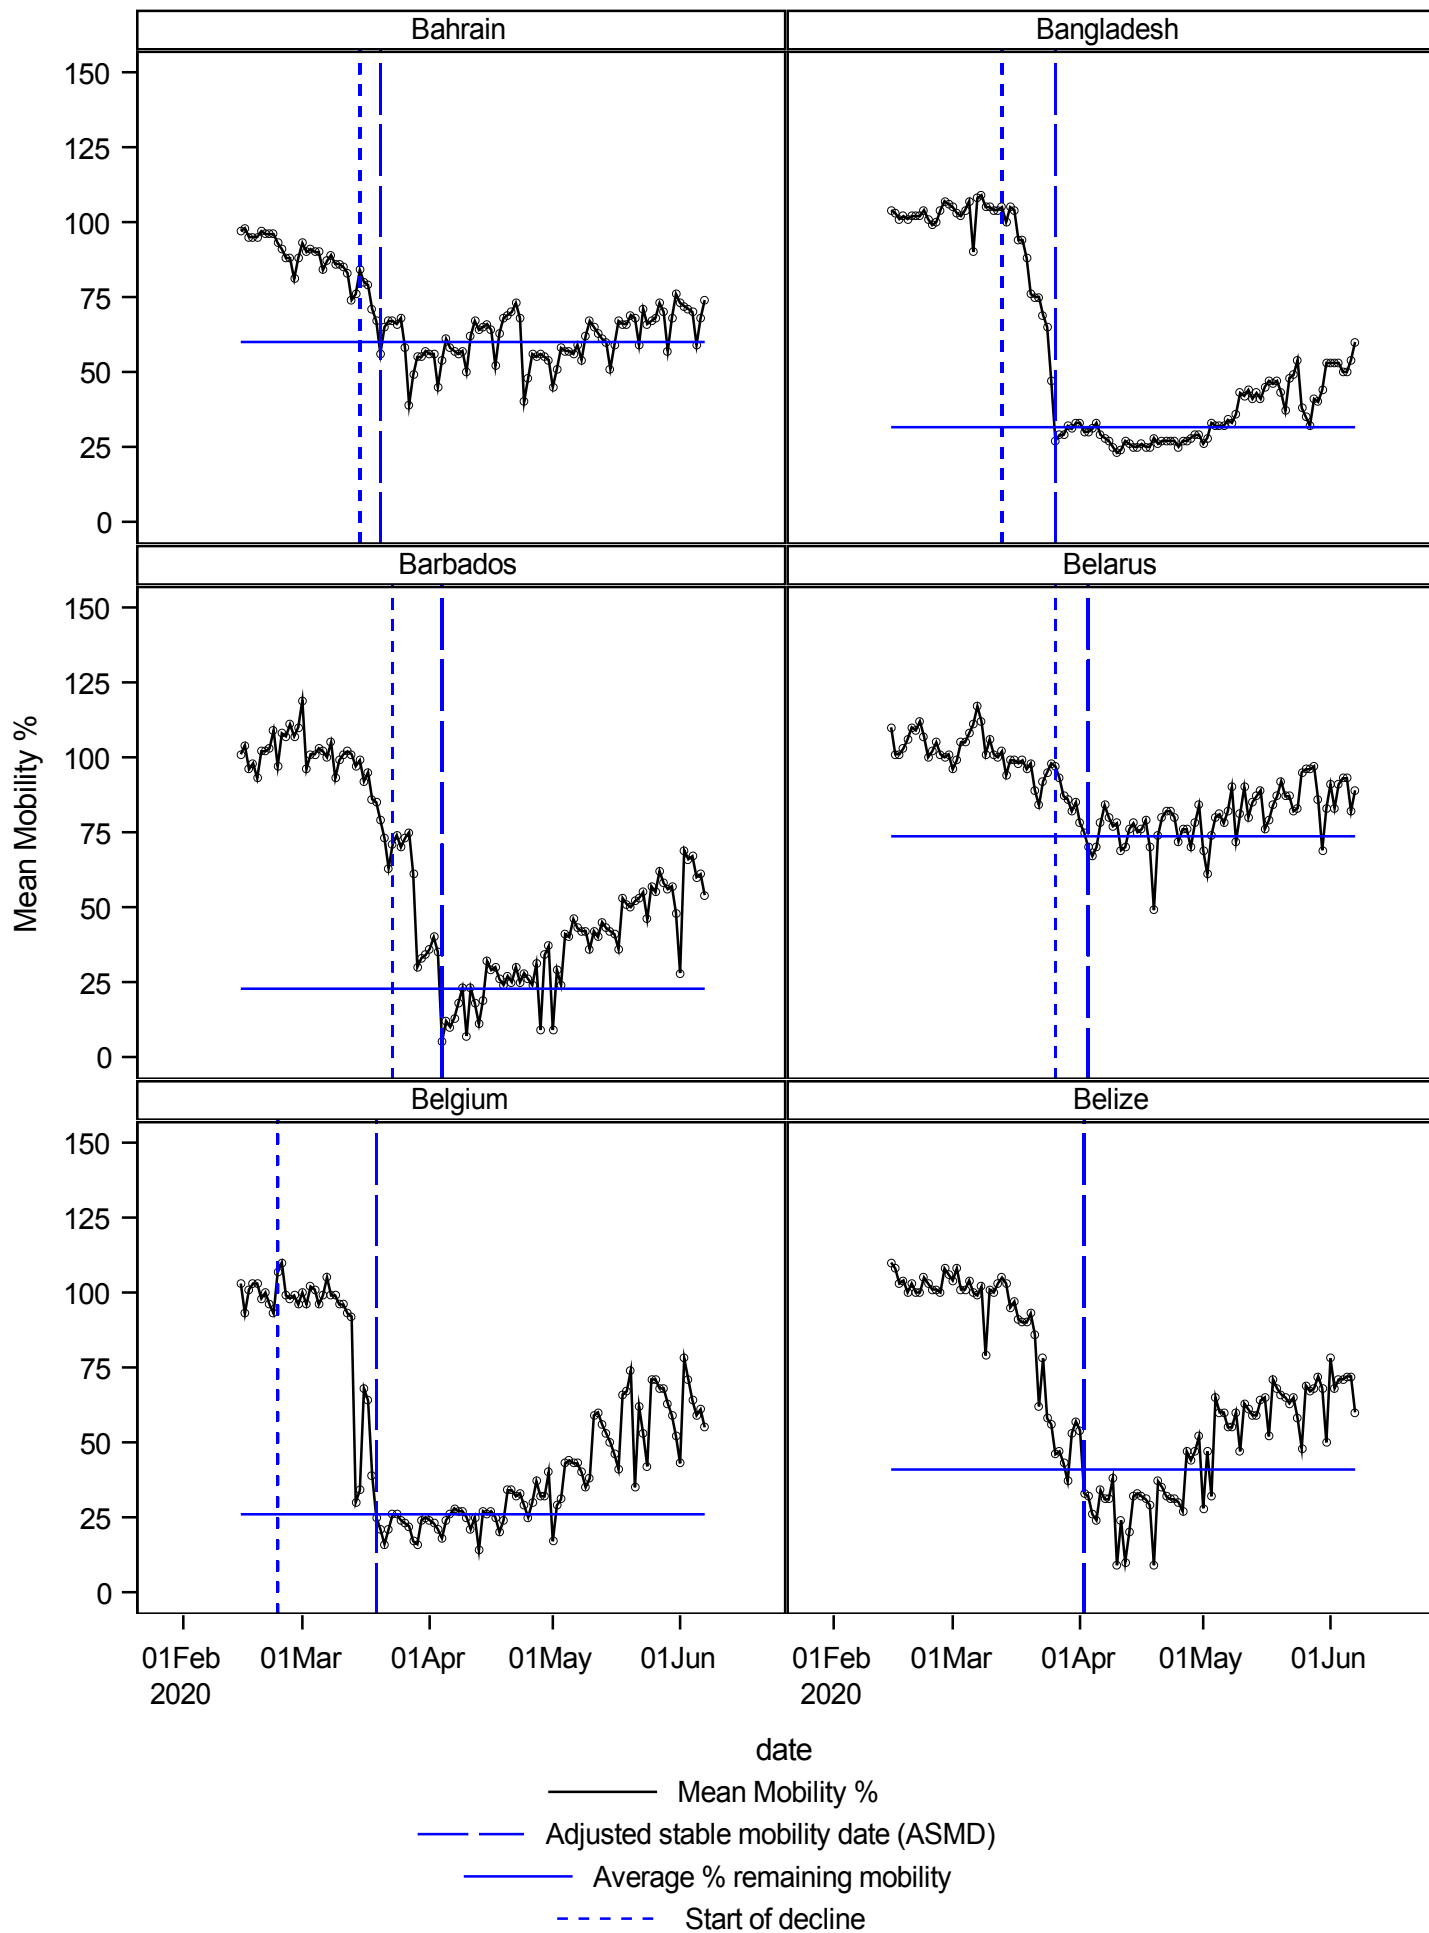

Supplementary Figures 2 Google RAR mobility profiles per country

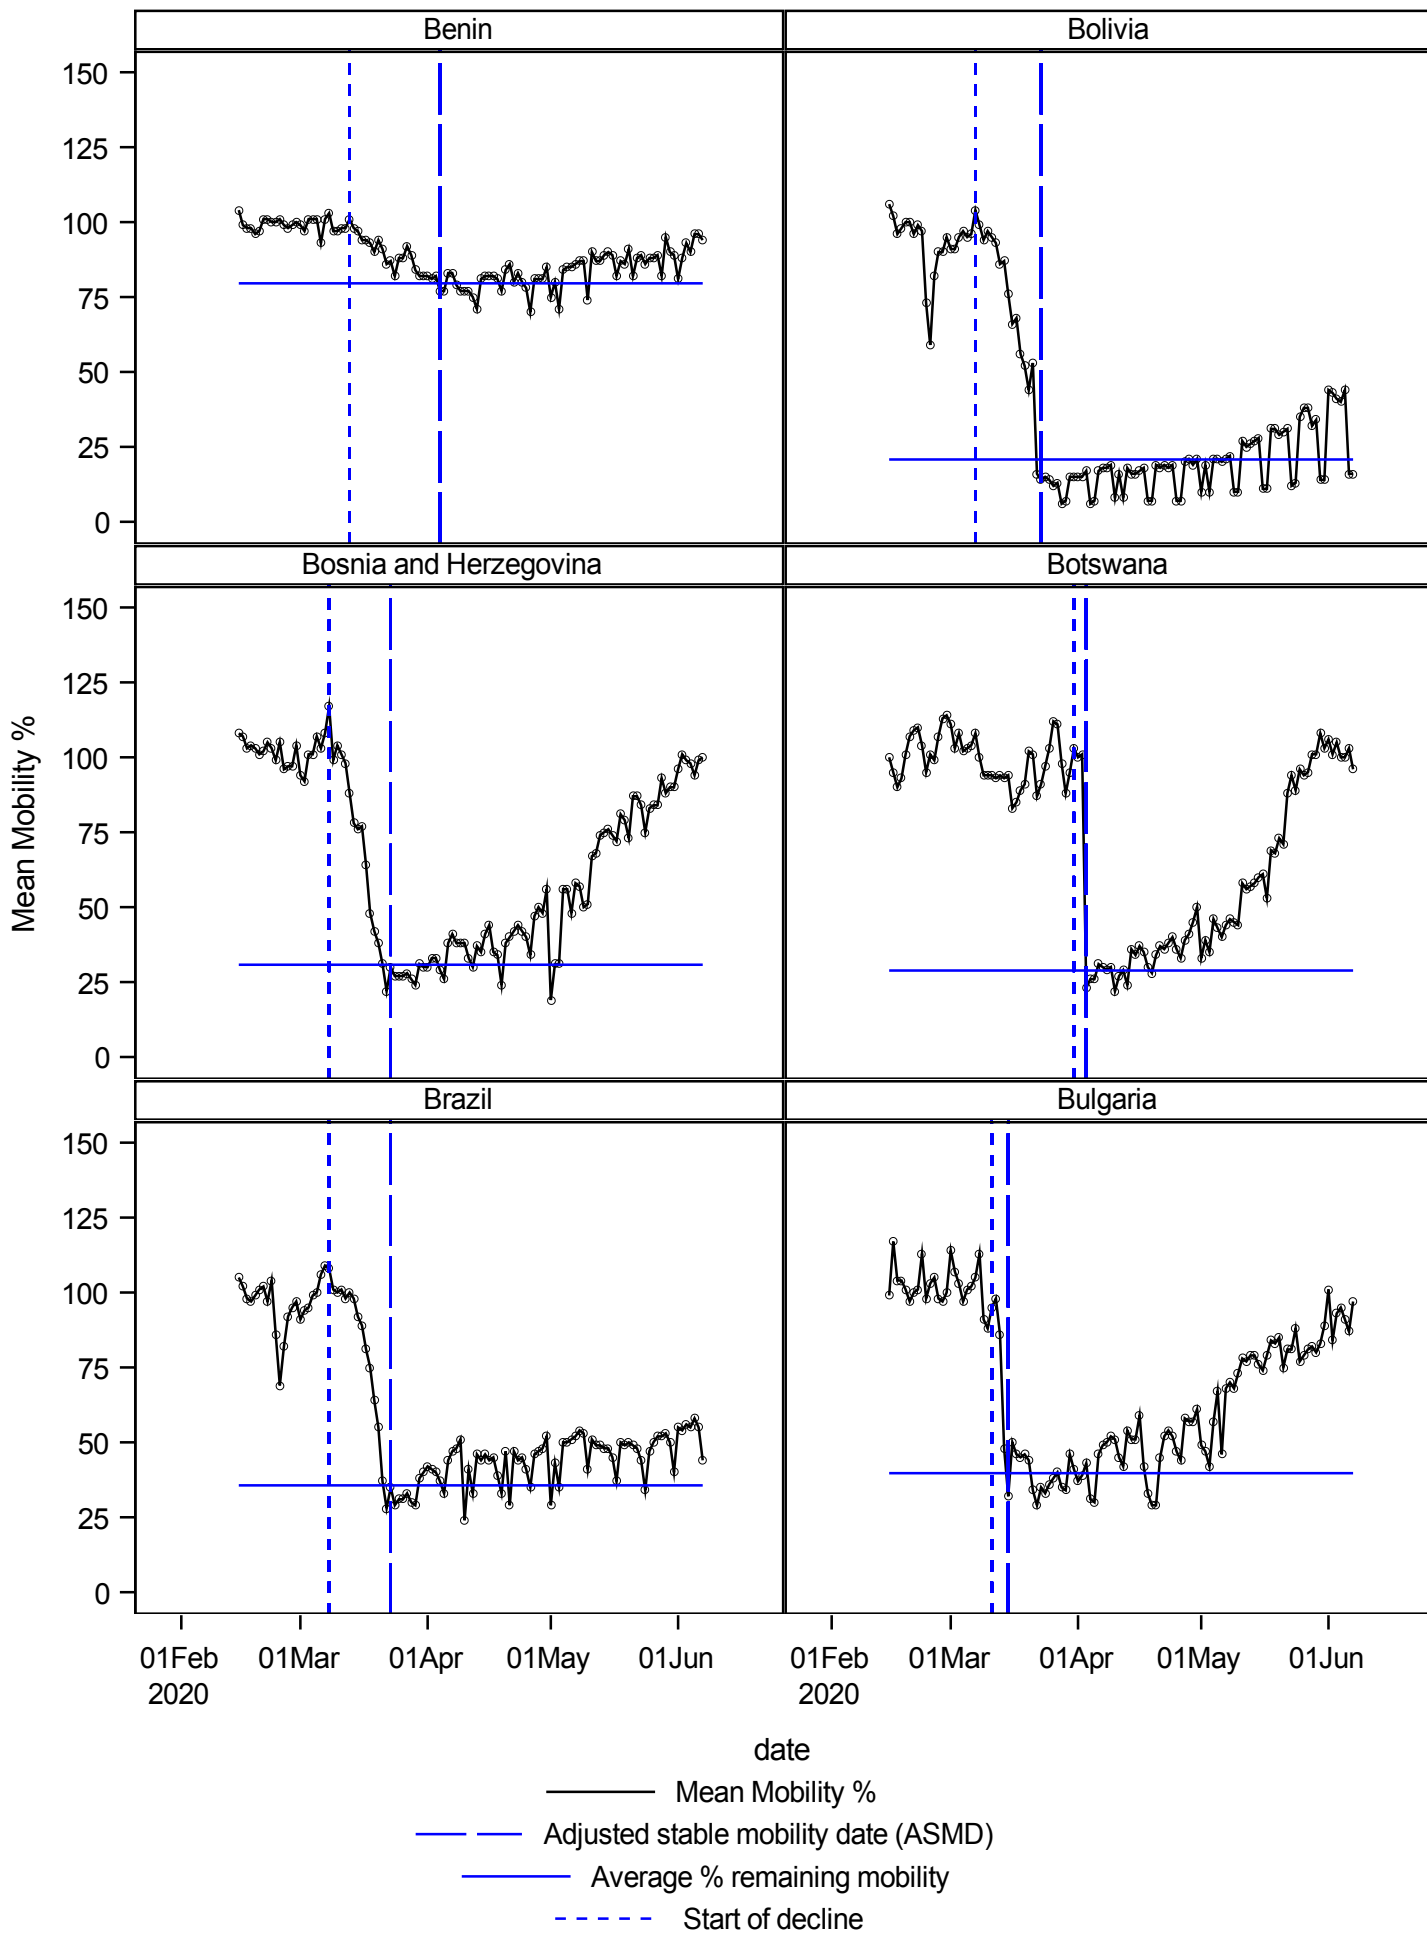

Supplementary Figures 2 Google RAR mobility profiles per country

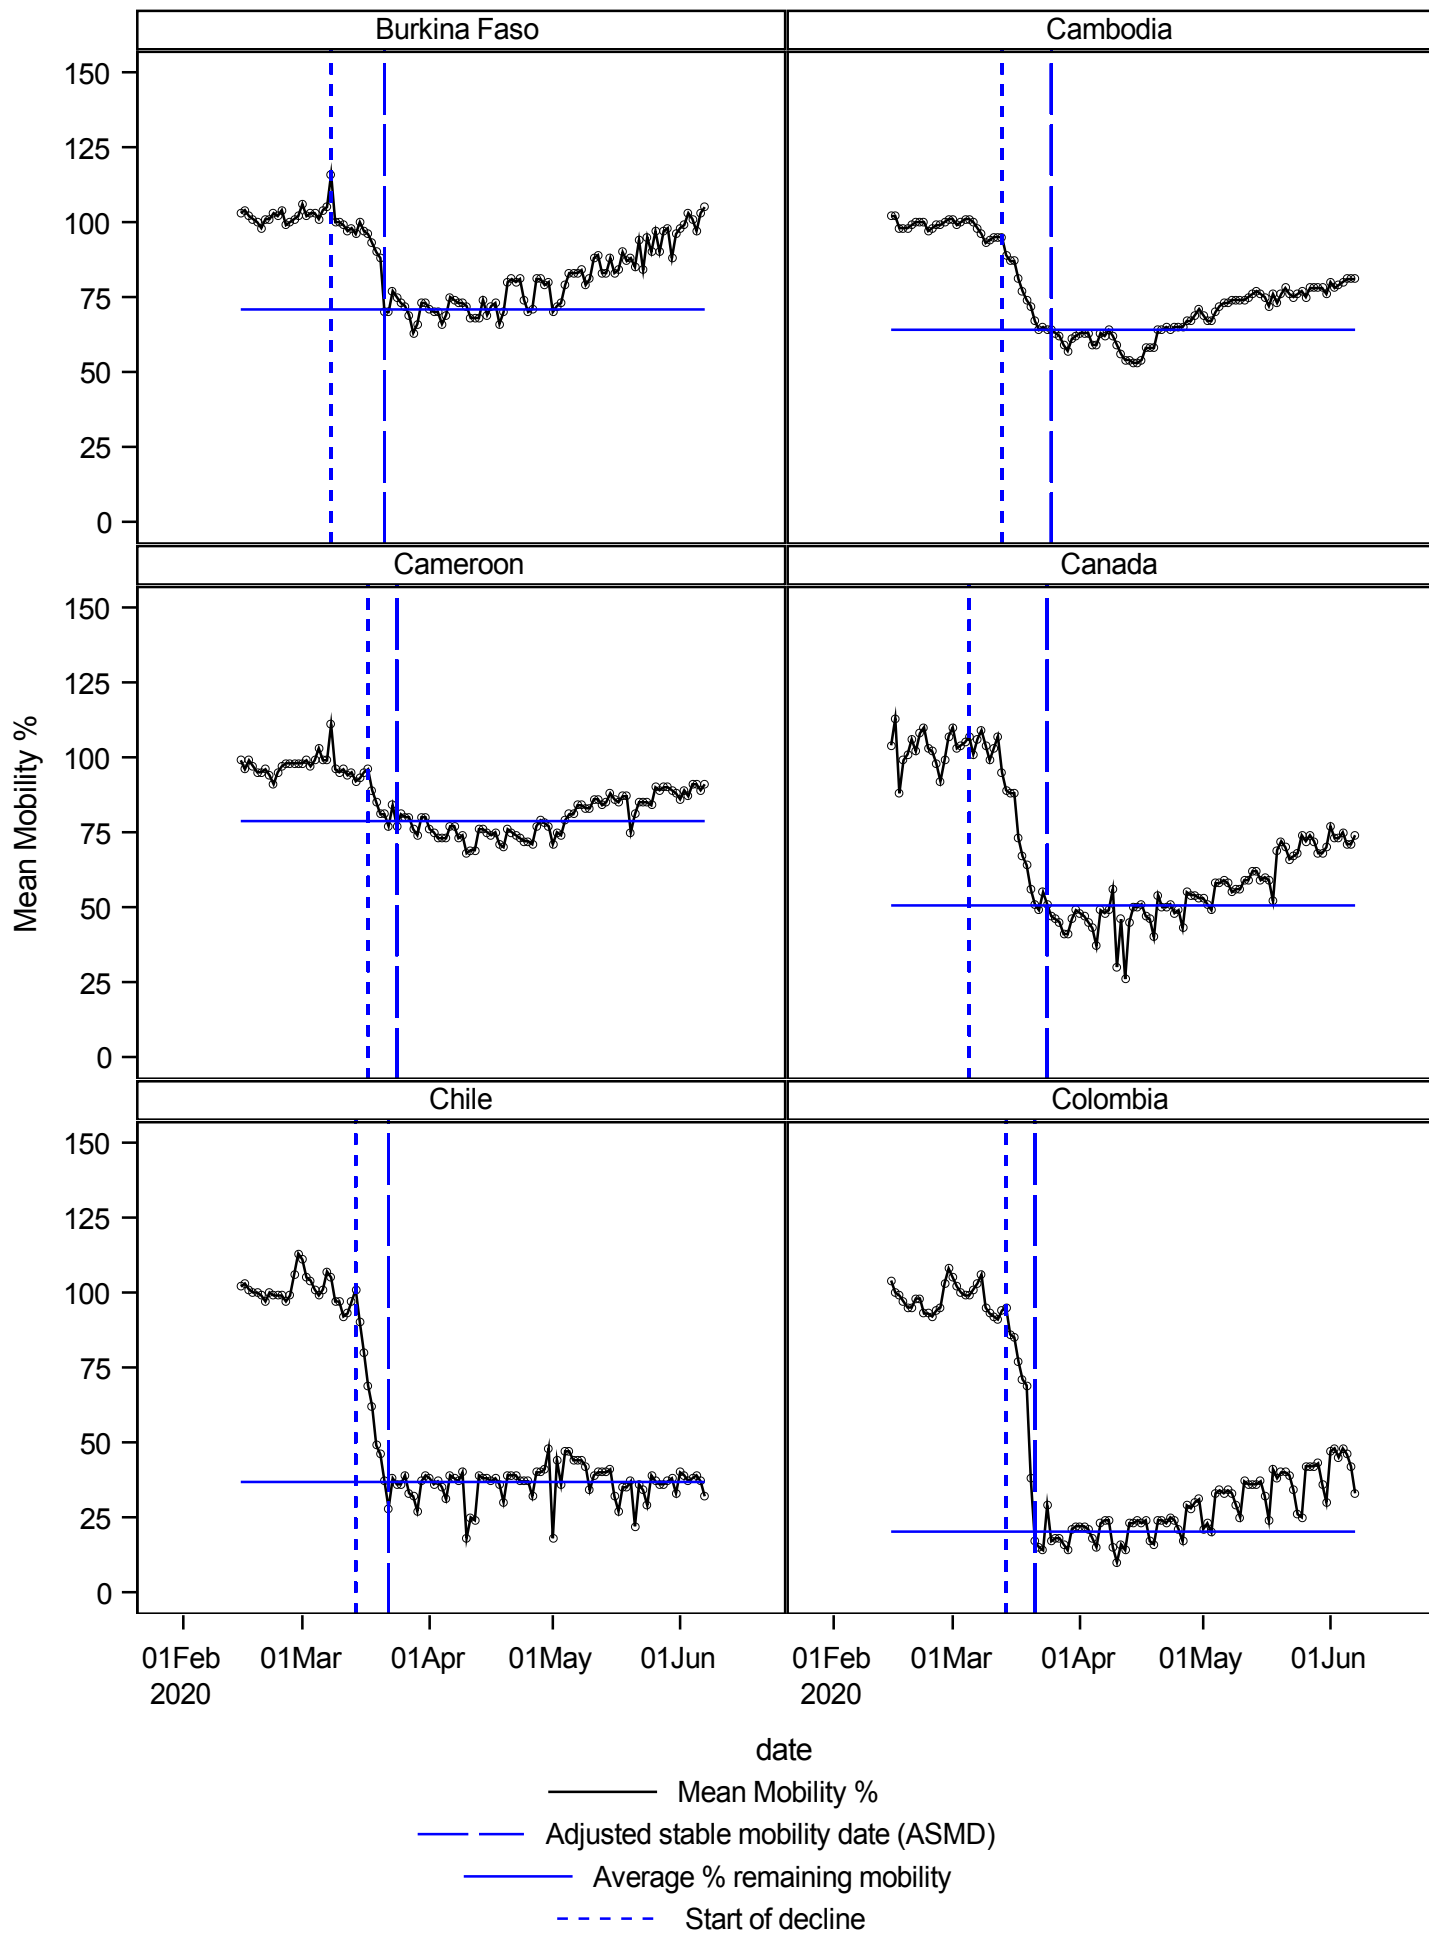

Supplementary Figures 2 Google RAR mobility profiles per country

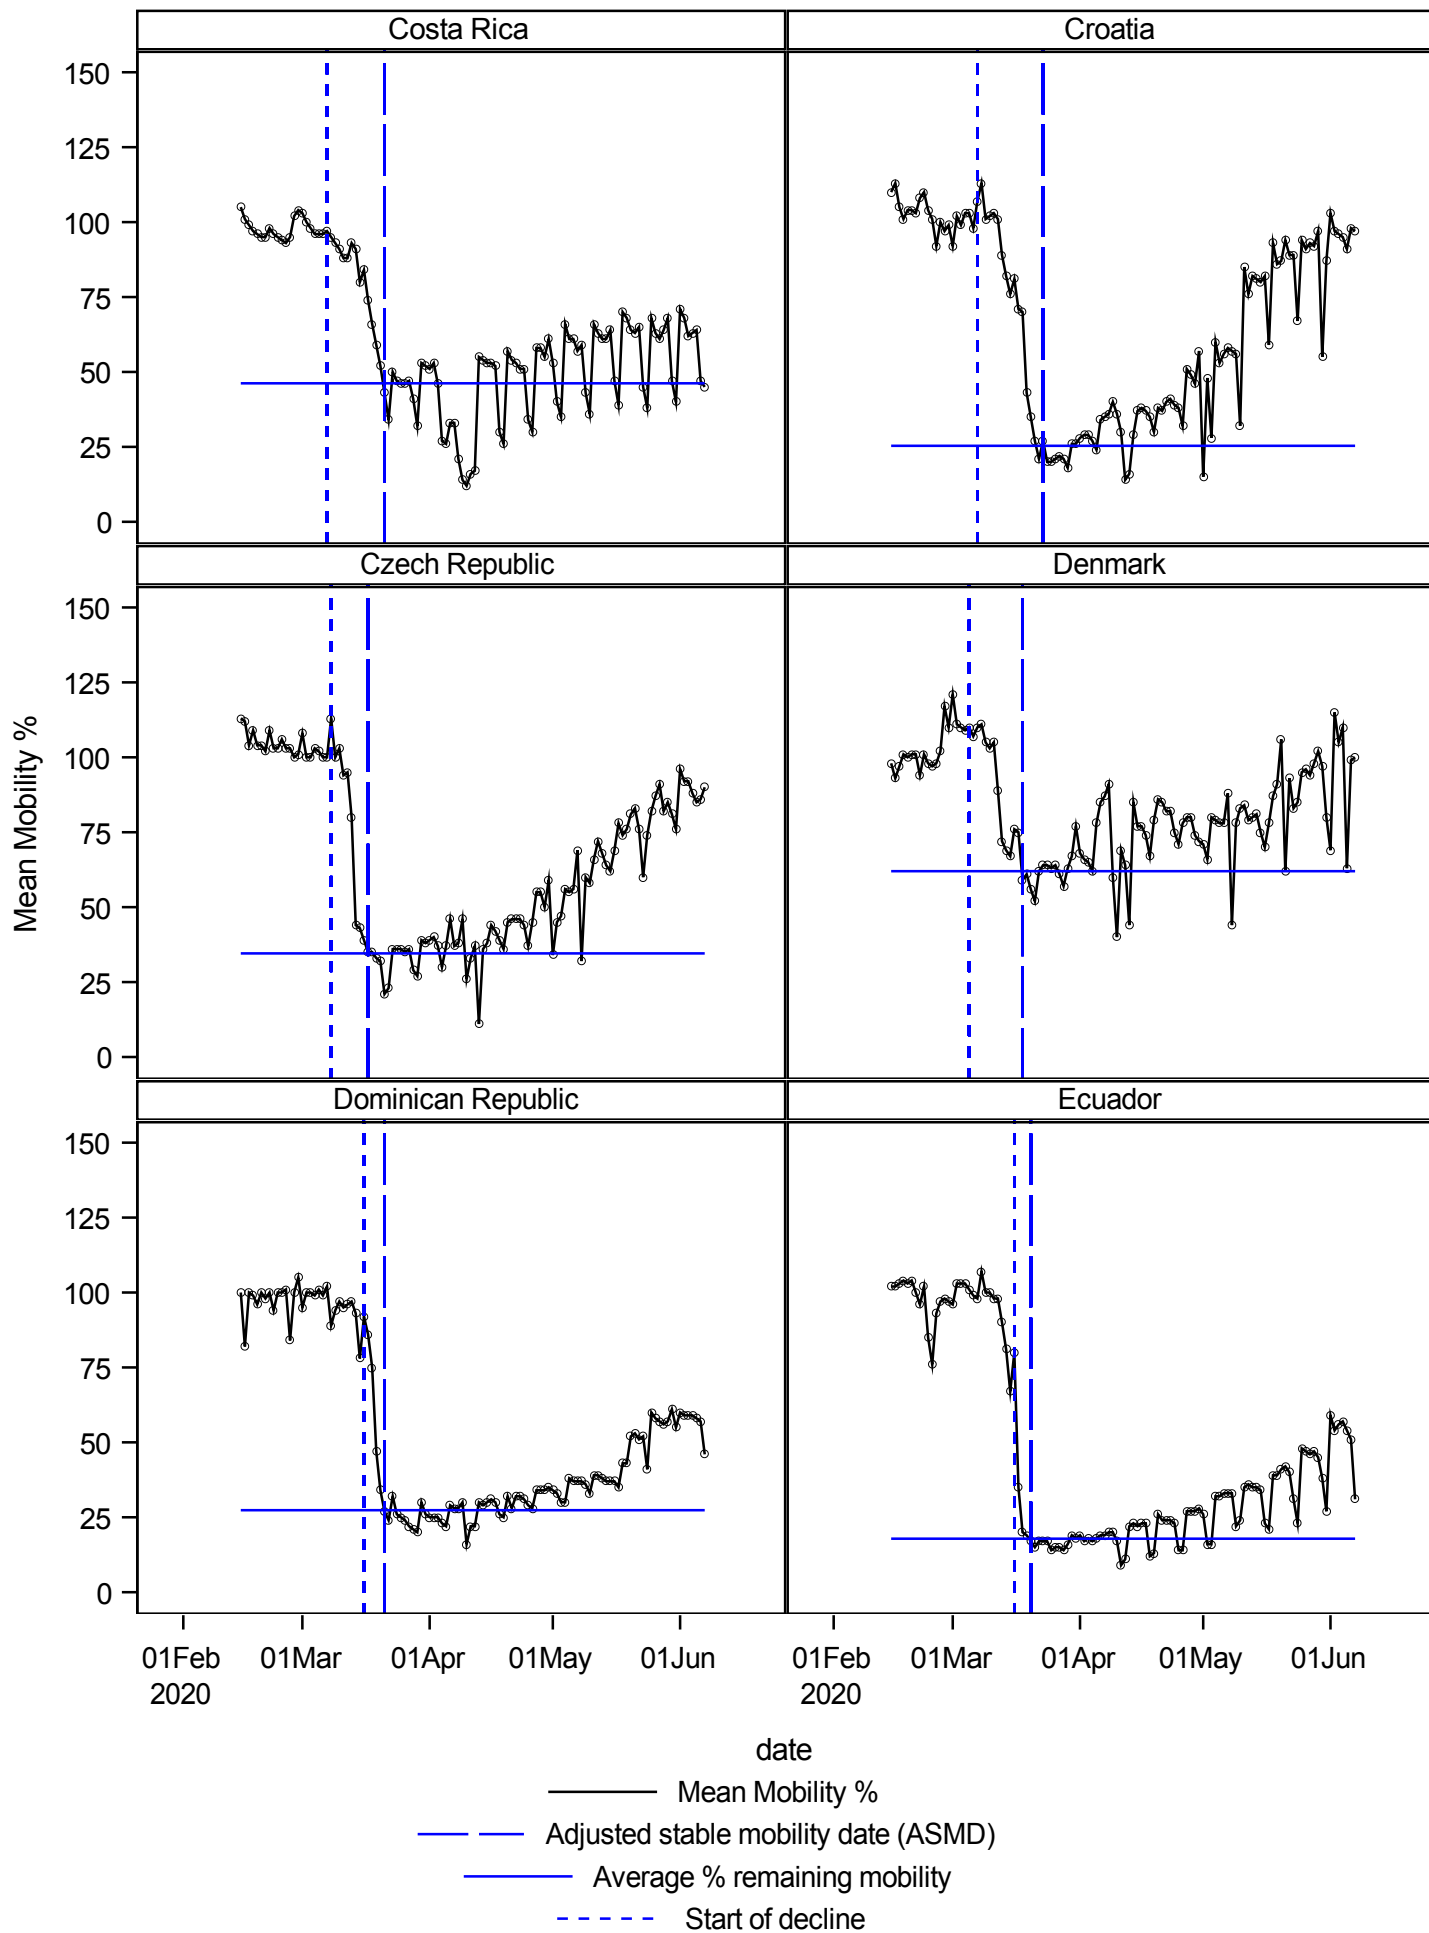

Supplementary Figures 2 Google RAR mobility profiles per country

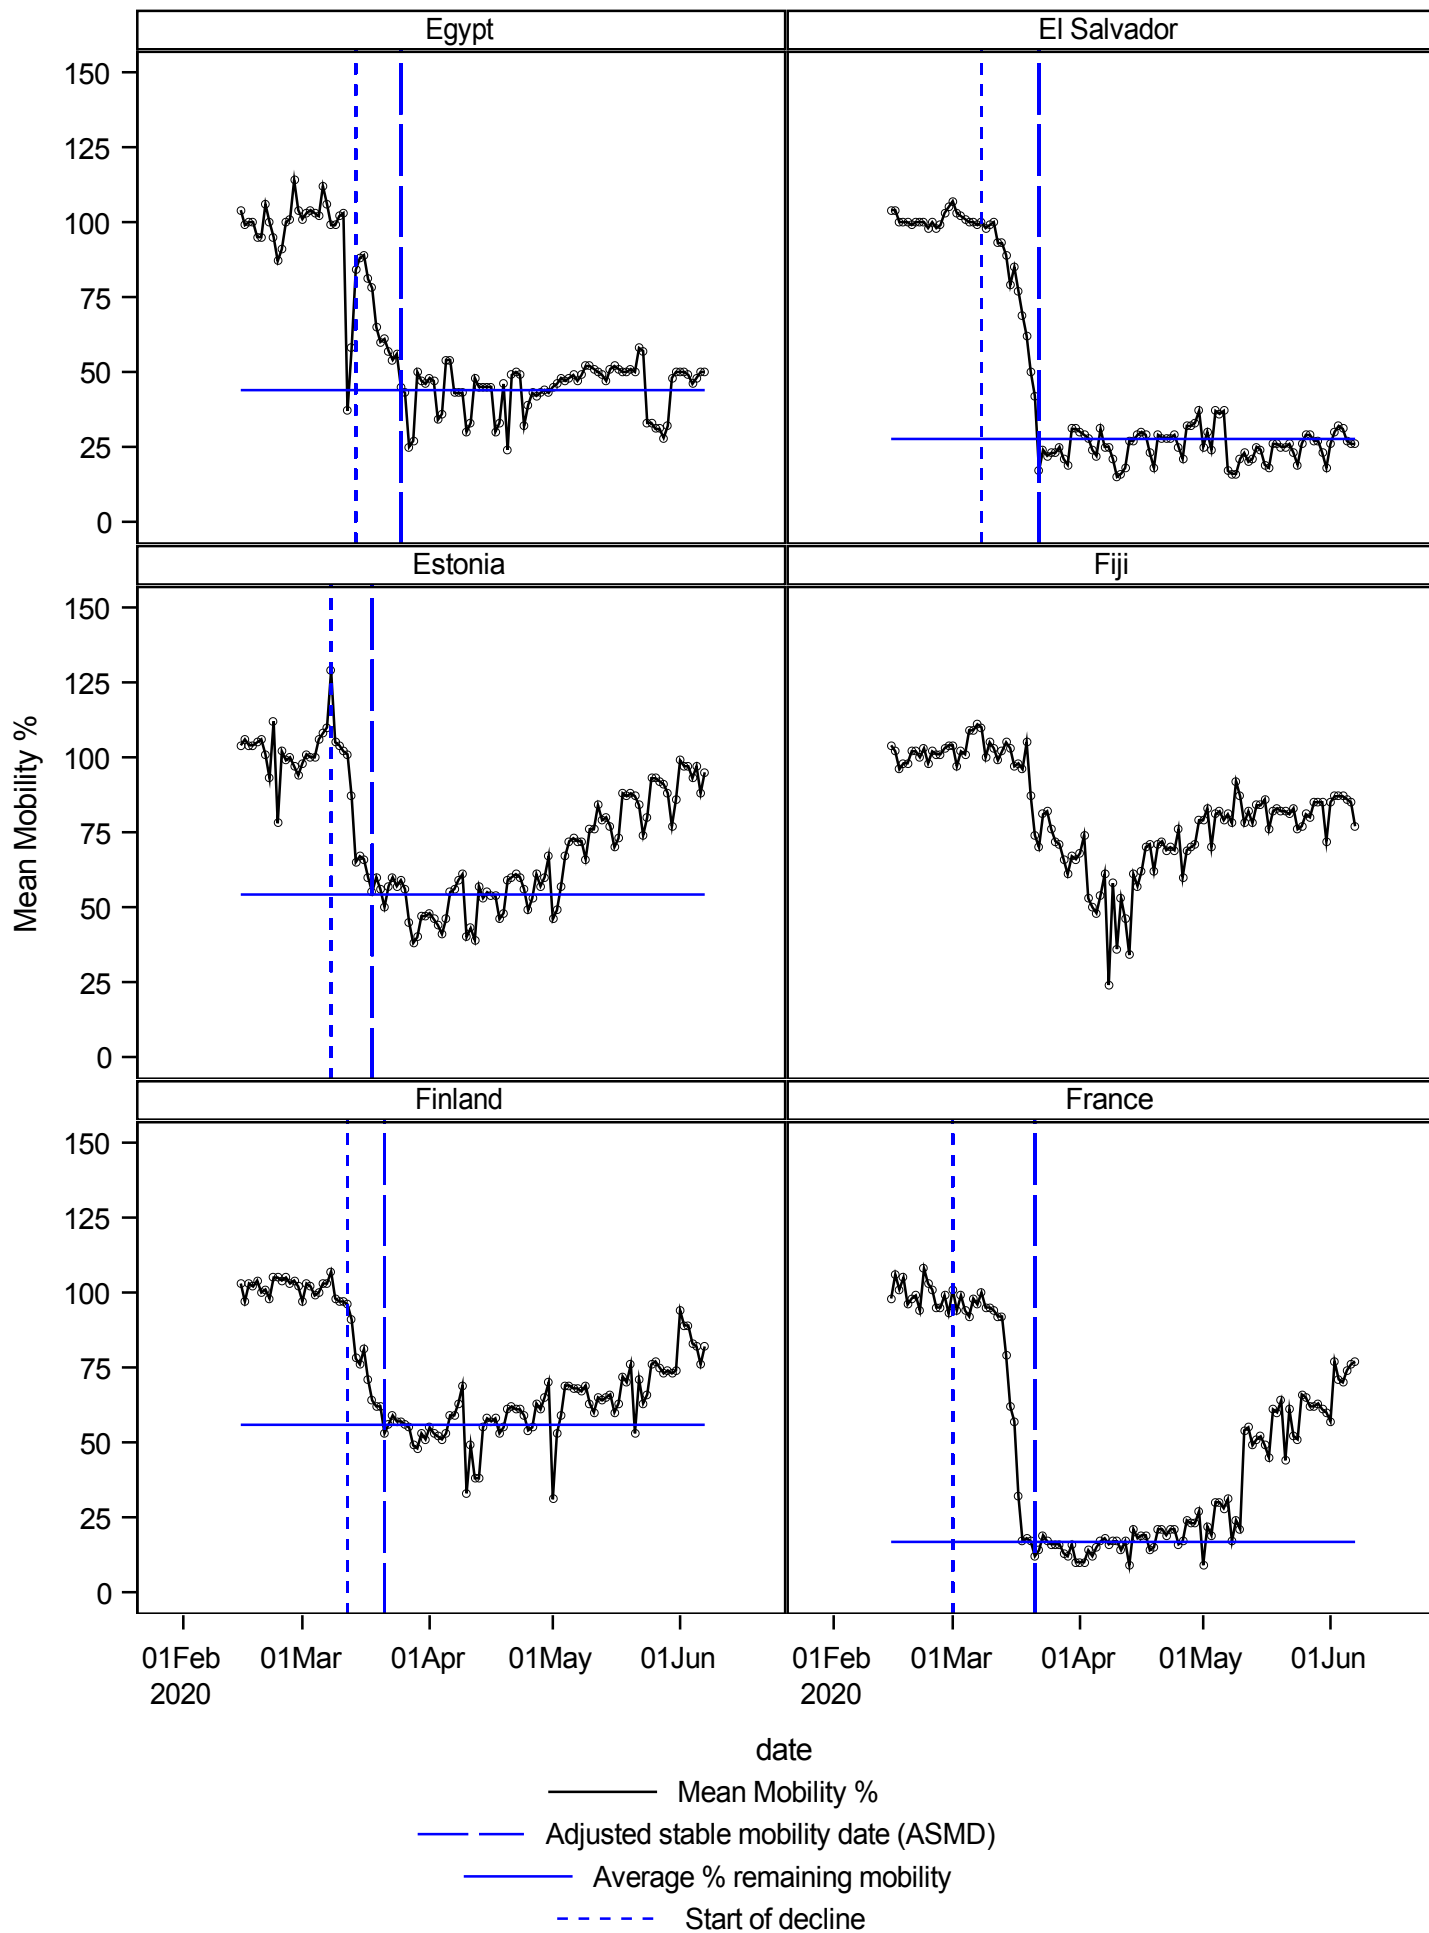



Supplementary Figures 2 Google RAR mobility profiles per country

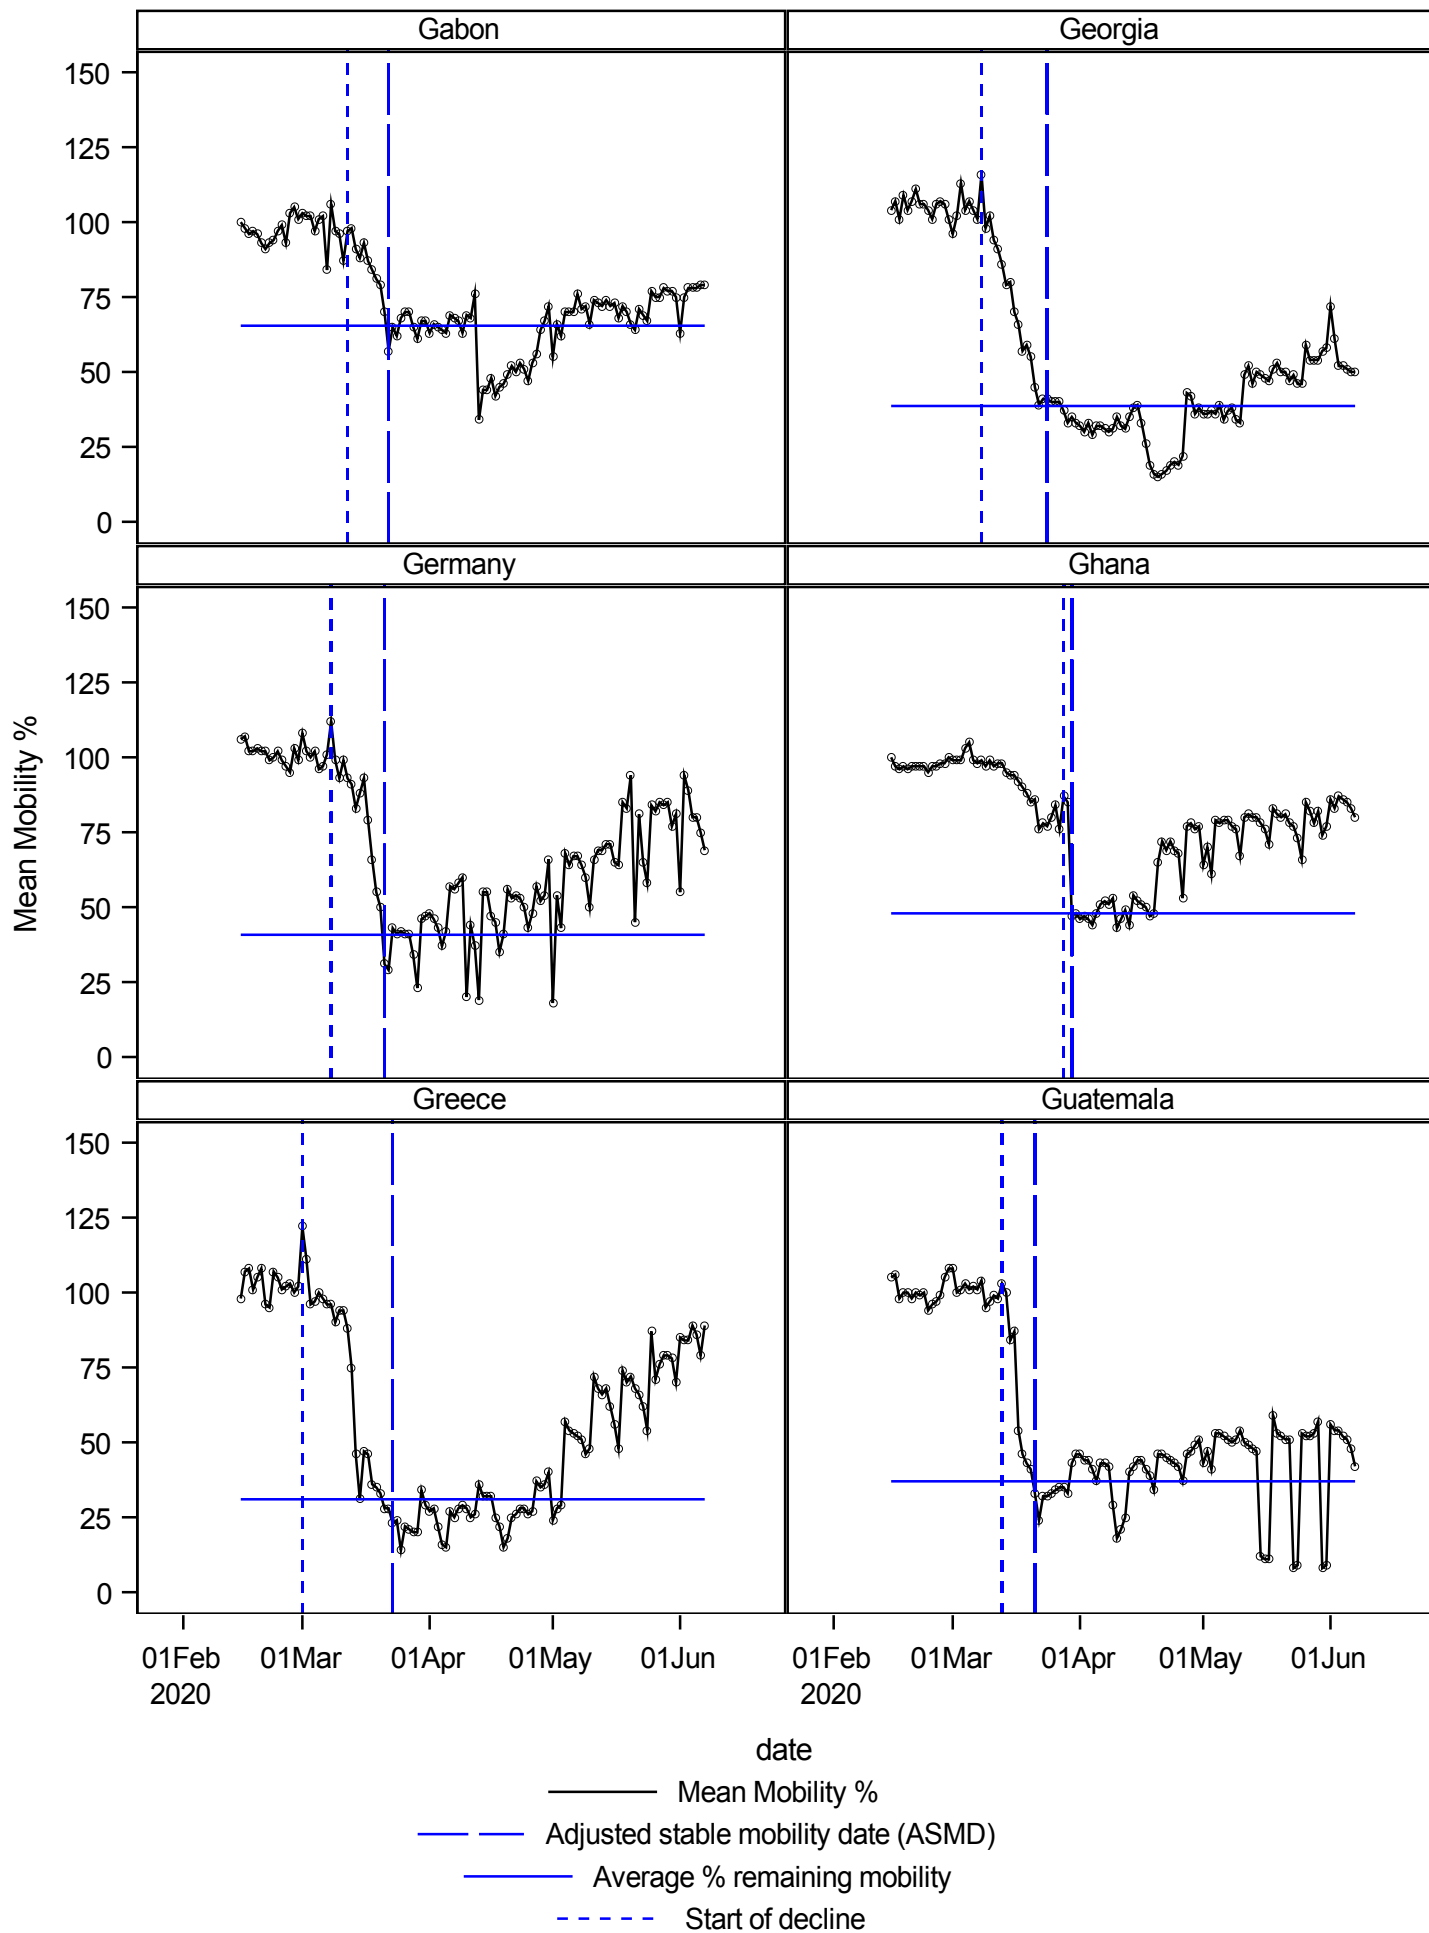

Supplementary Figures 2 Google RAR mobility profiles per country

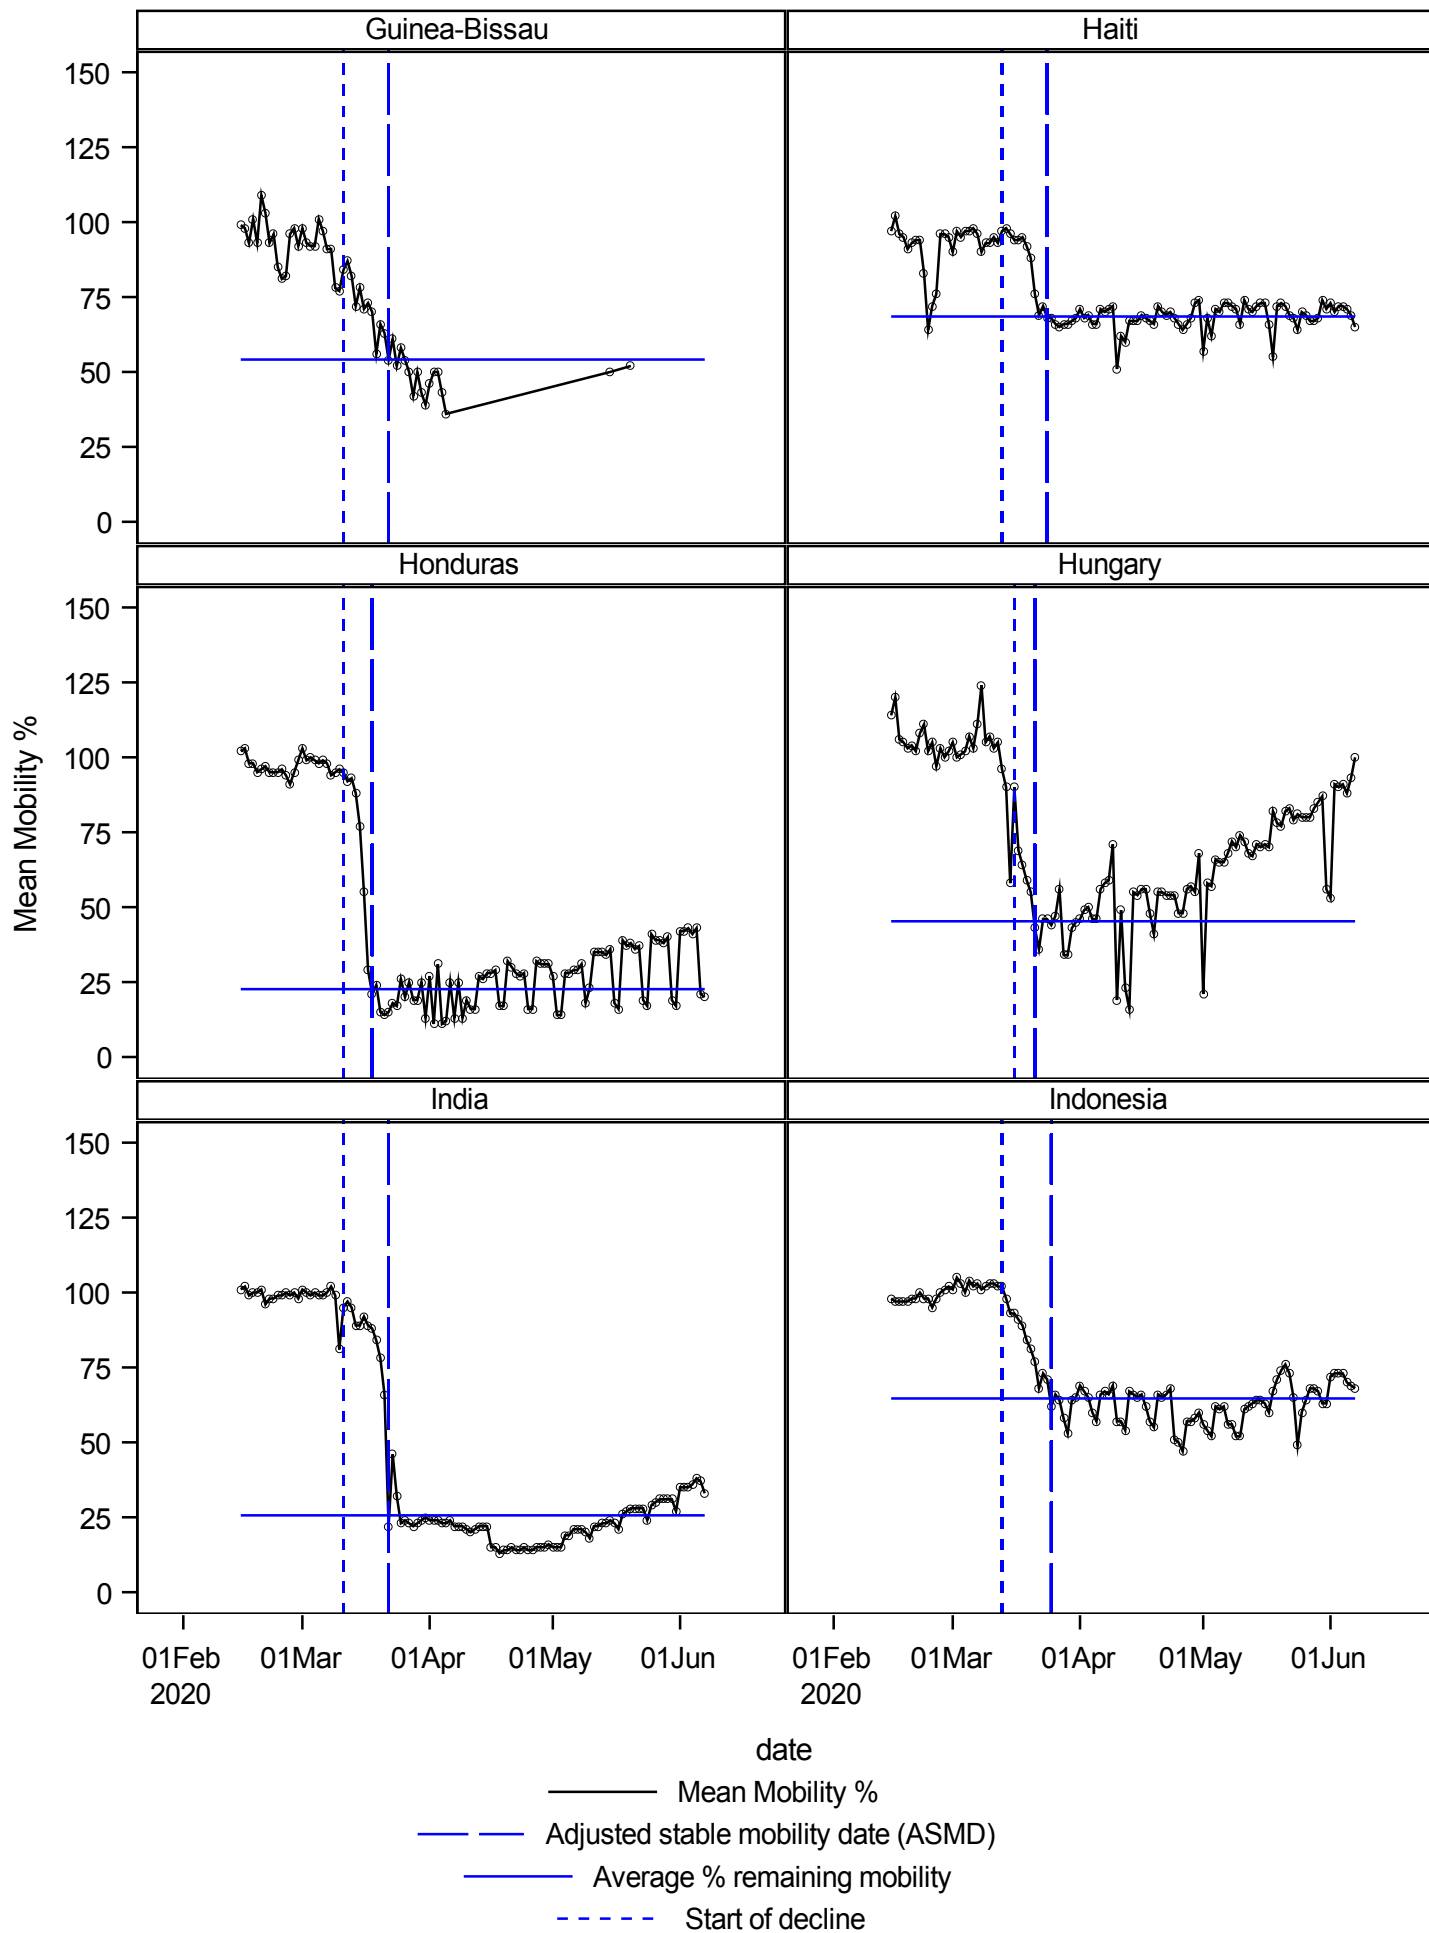

Supplementary Figures 2 Google RAR mobility profiles per country

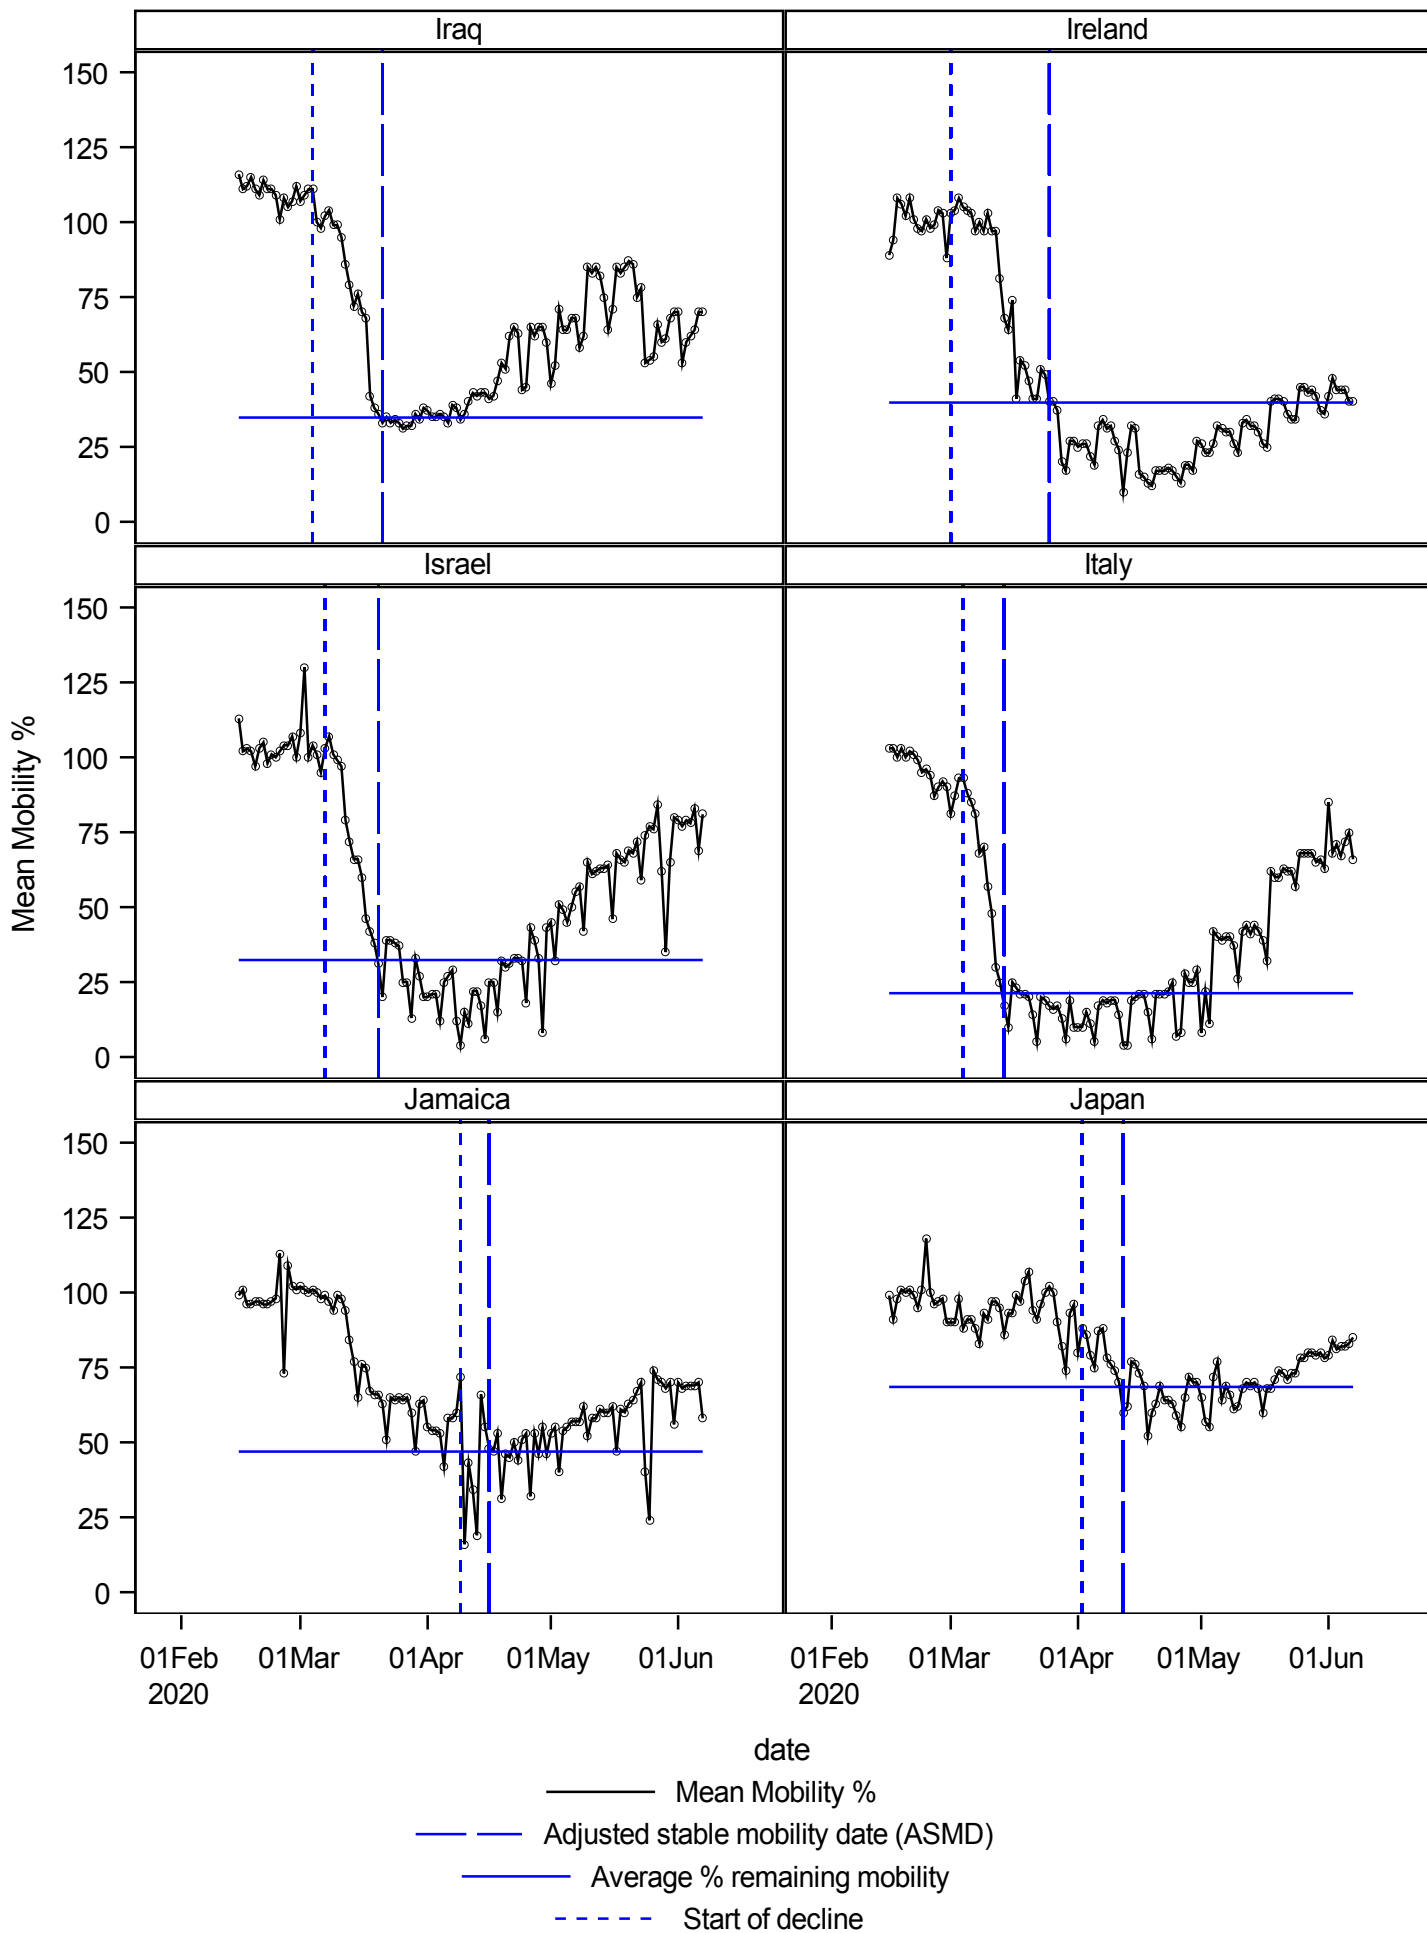

Supplementary Figures 2 Google RAR mobility profiles per country

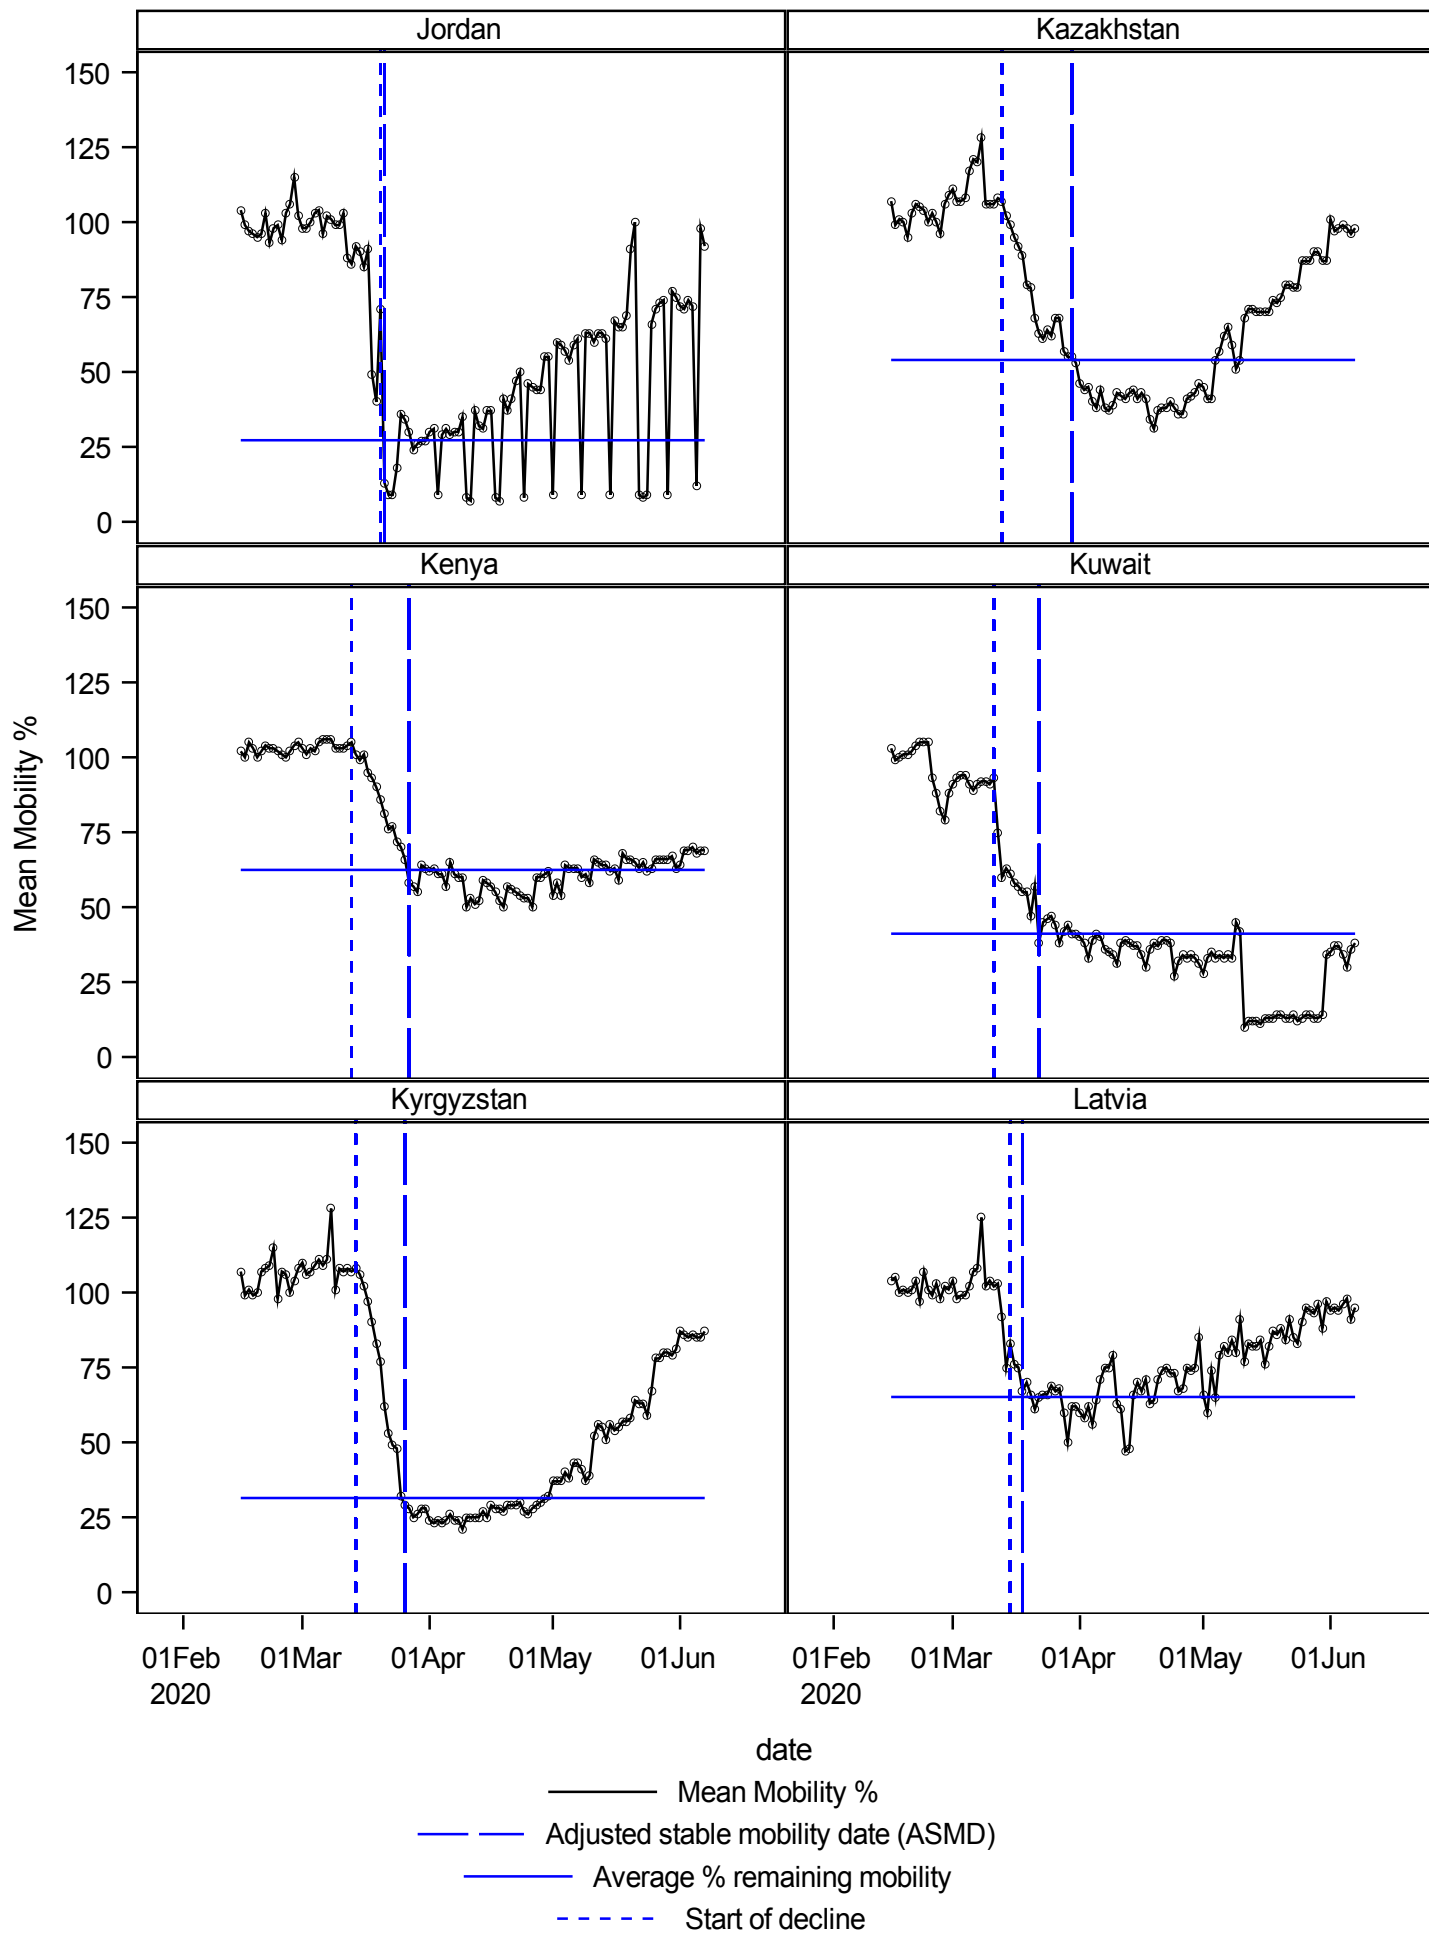

Supplementary Figures 2 Google RAR mobility profiles per country

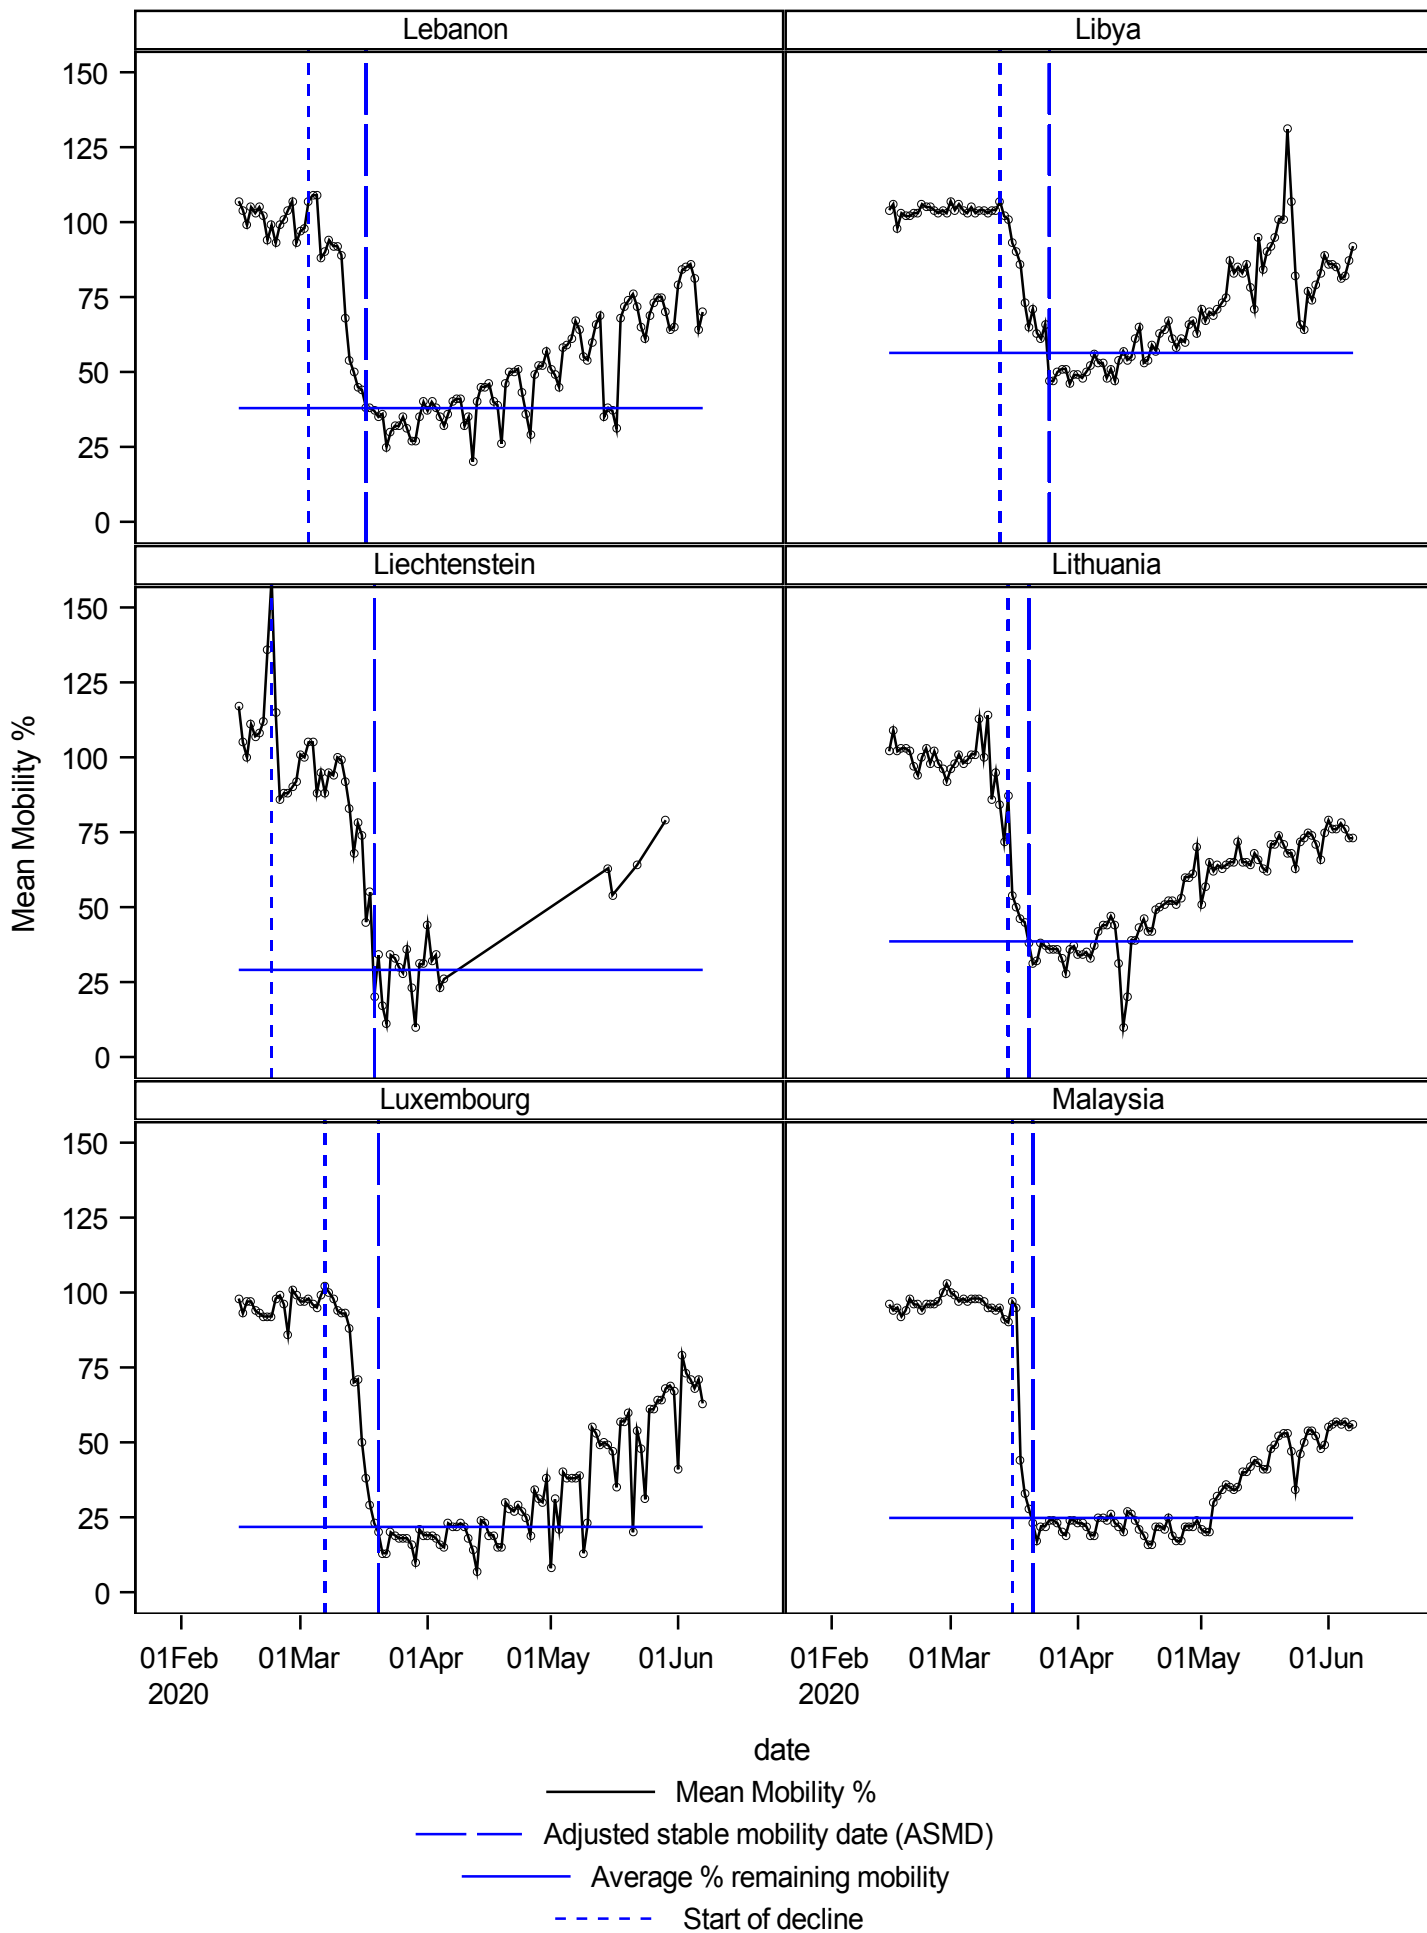

Supplementary Figures 2 Google RAR mobility profiles per country

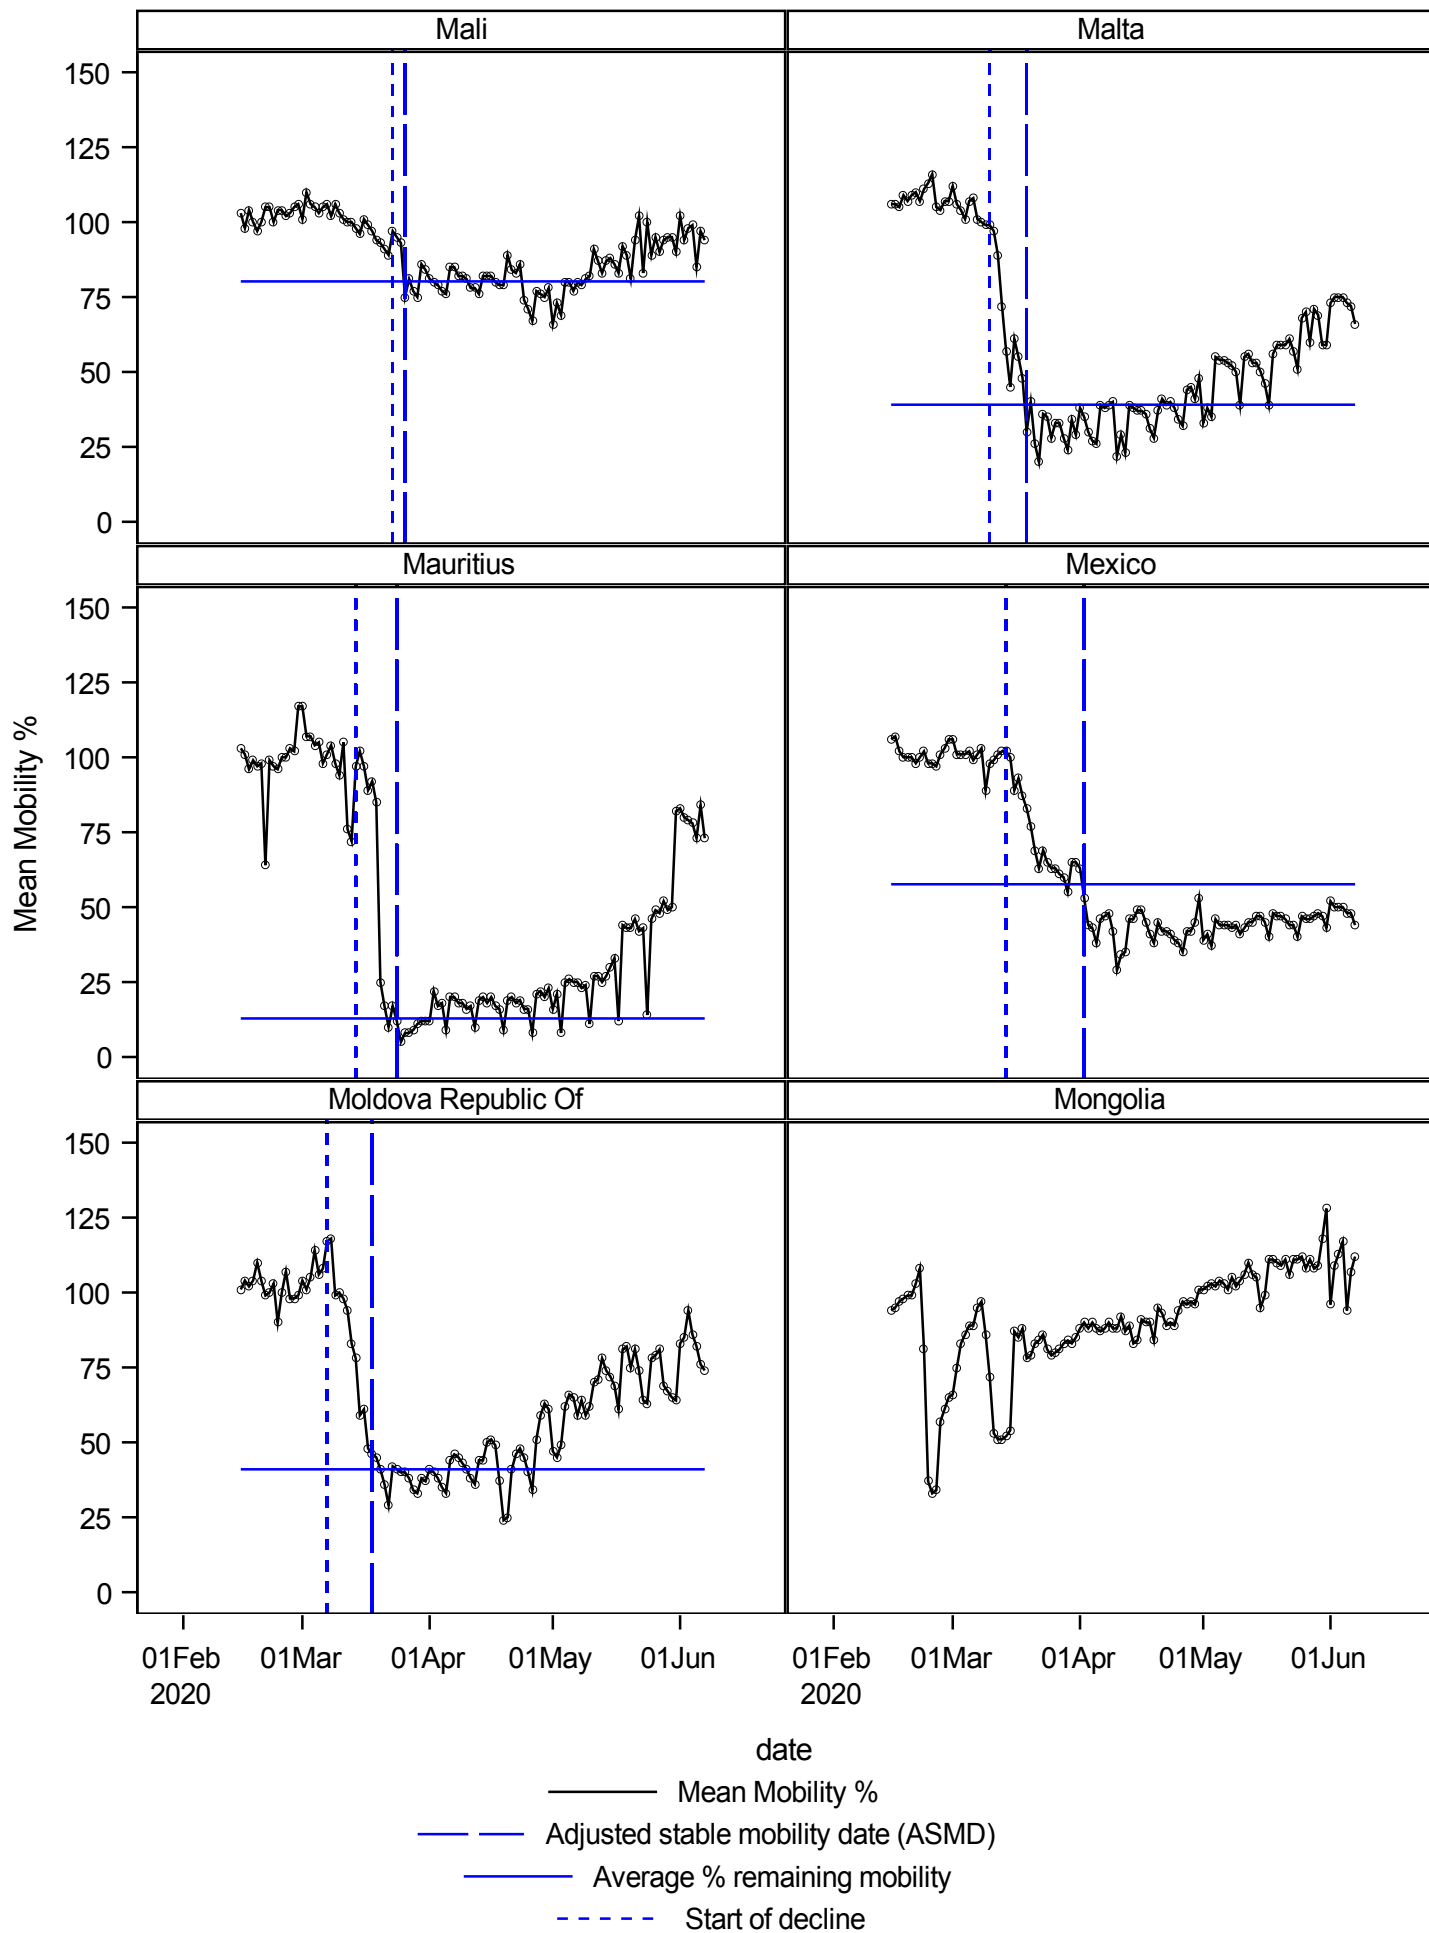

Supplementary Figures 2 Google RAR mobility profiles per country

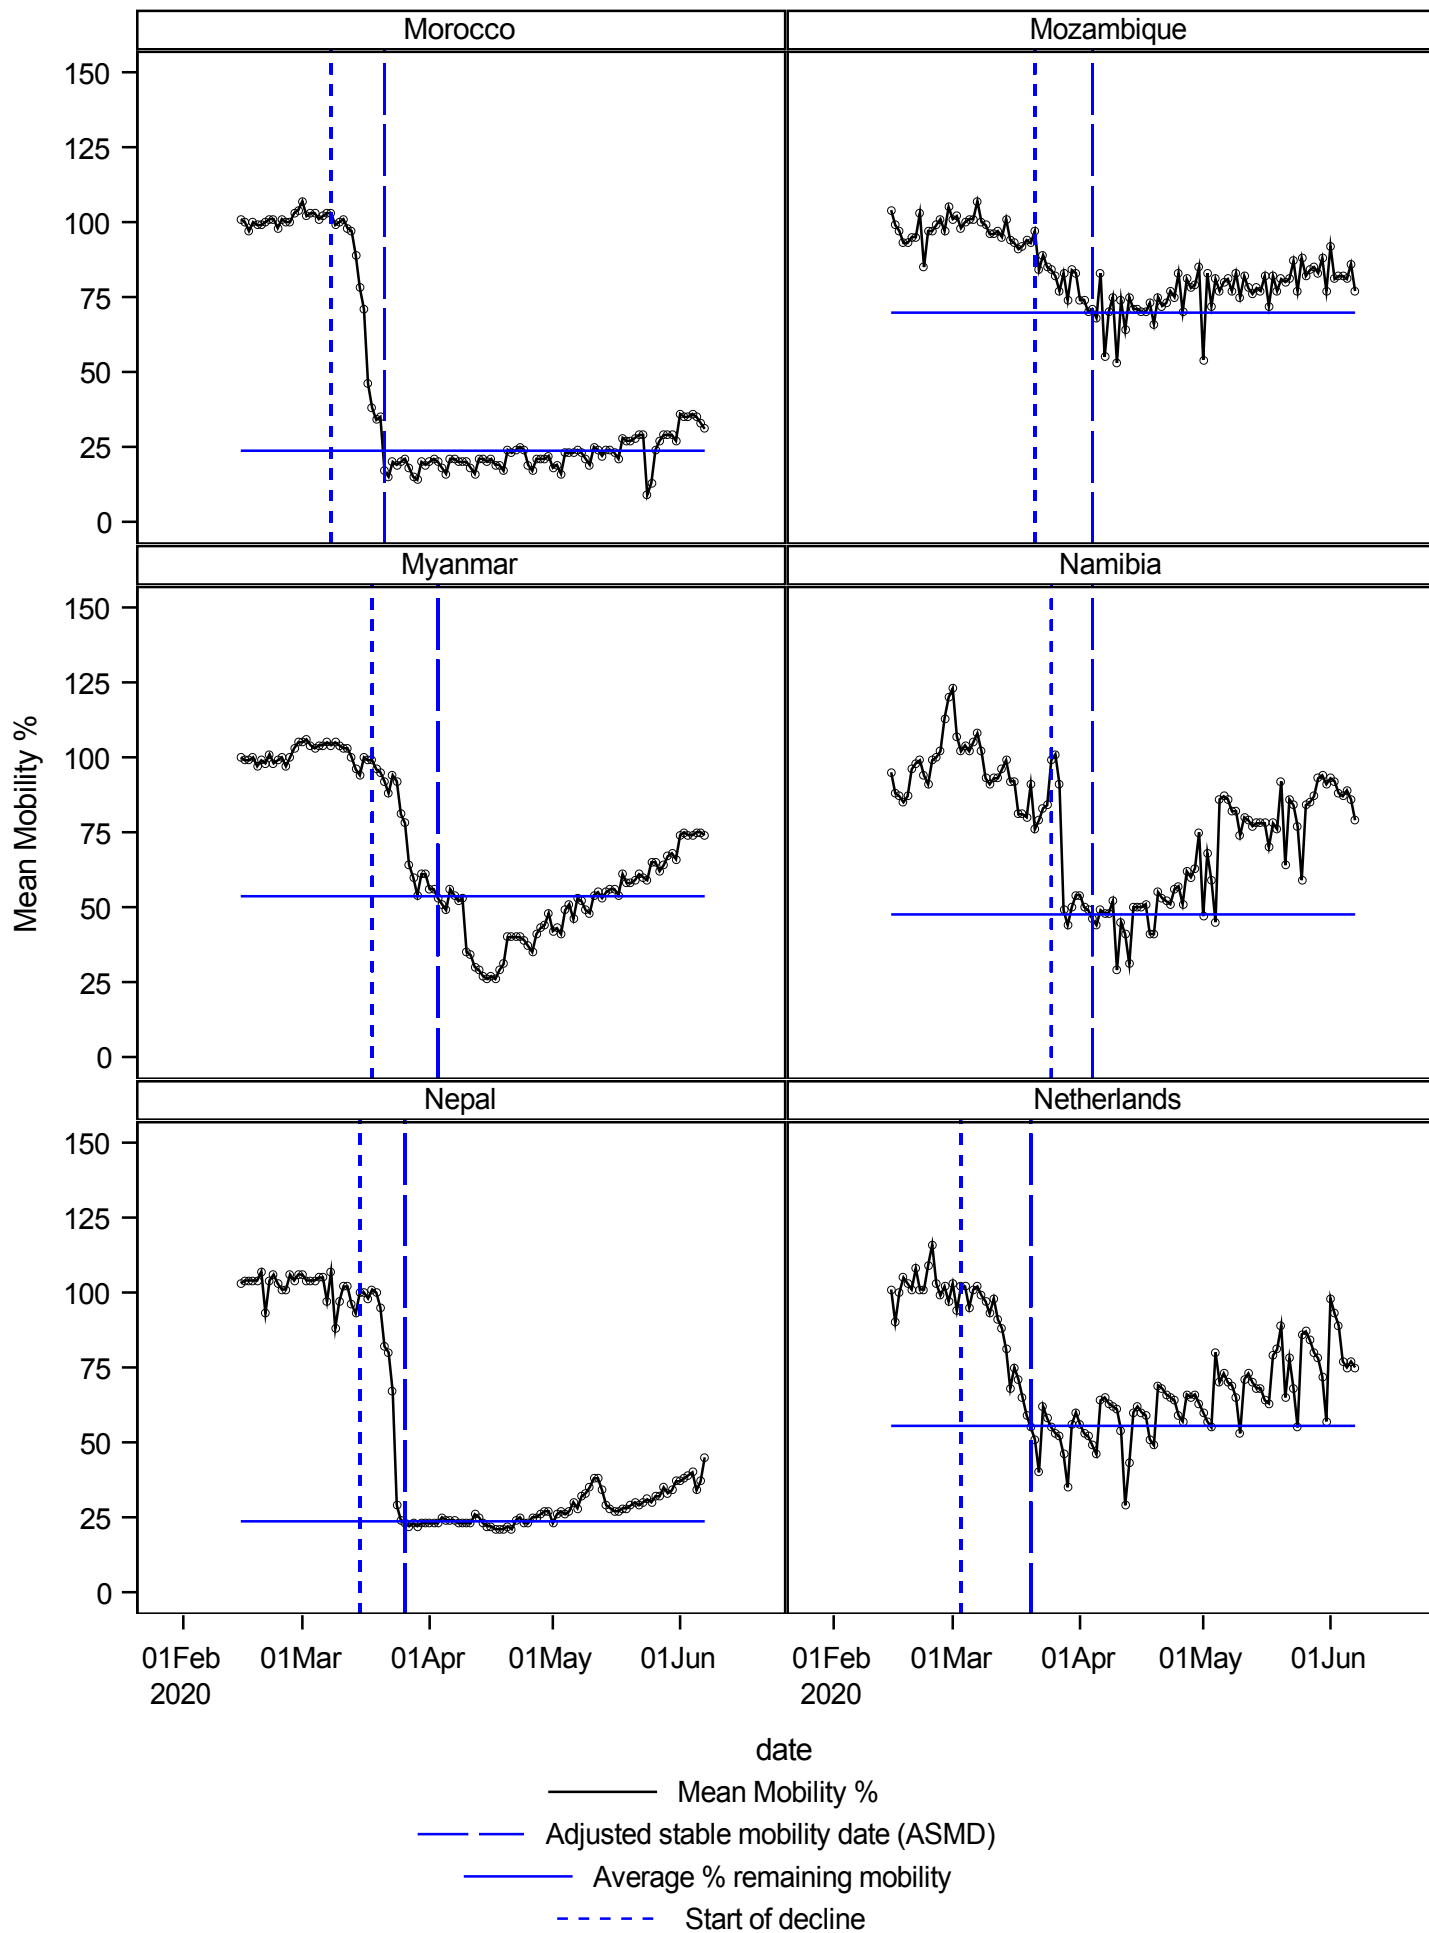

Supplementary Figures 2 Google RAR mobility profiles per country

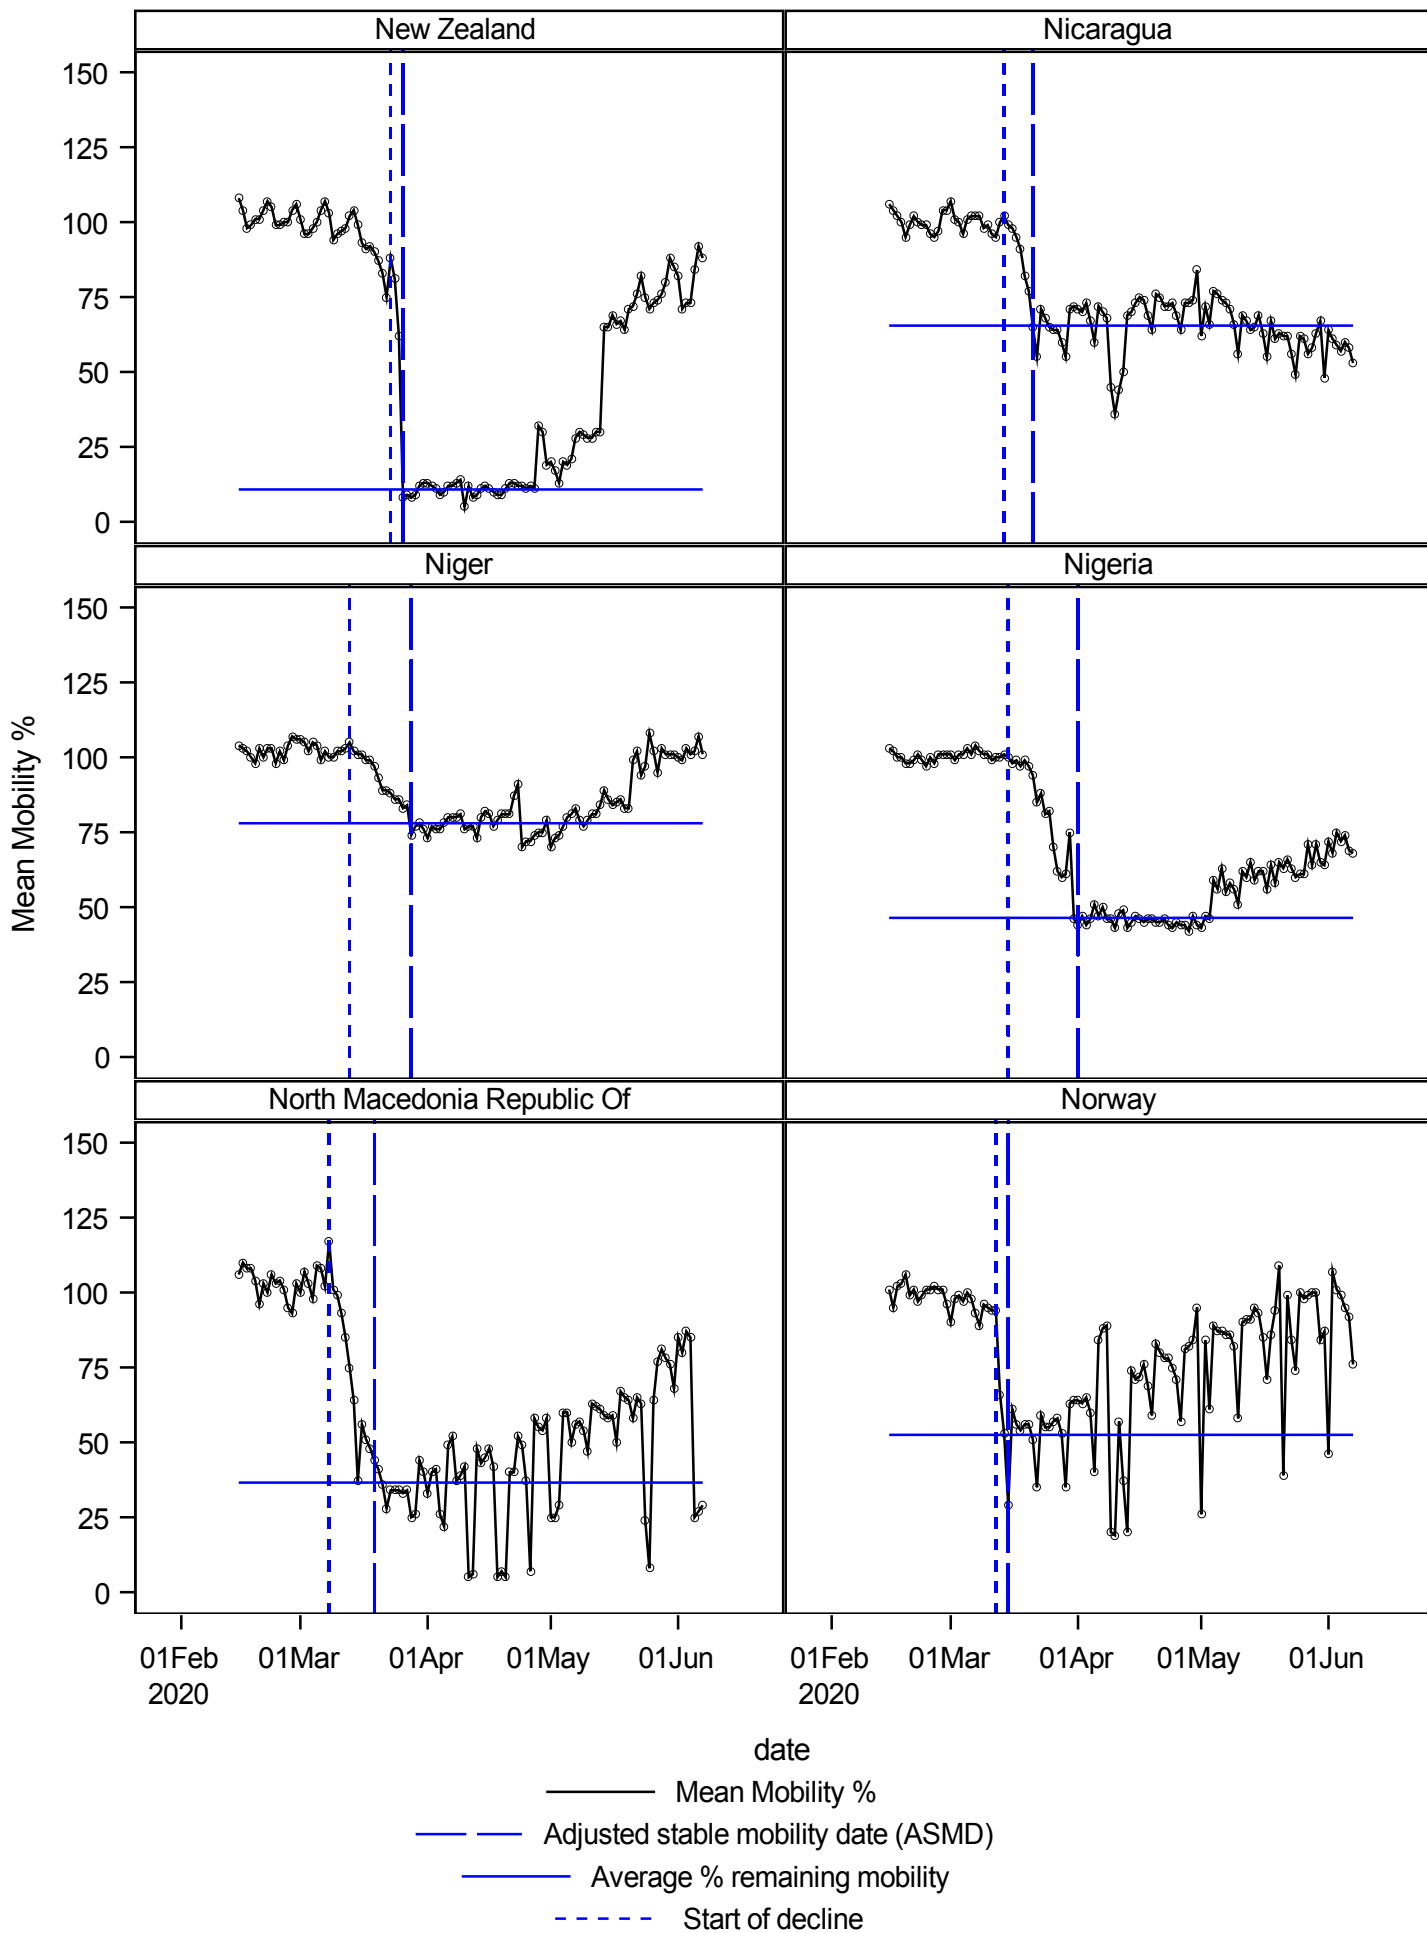



Supplementary Figures 2 Google RAR mobility profiles per country

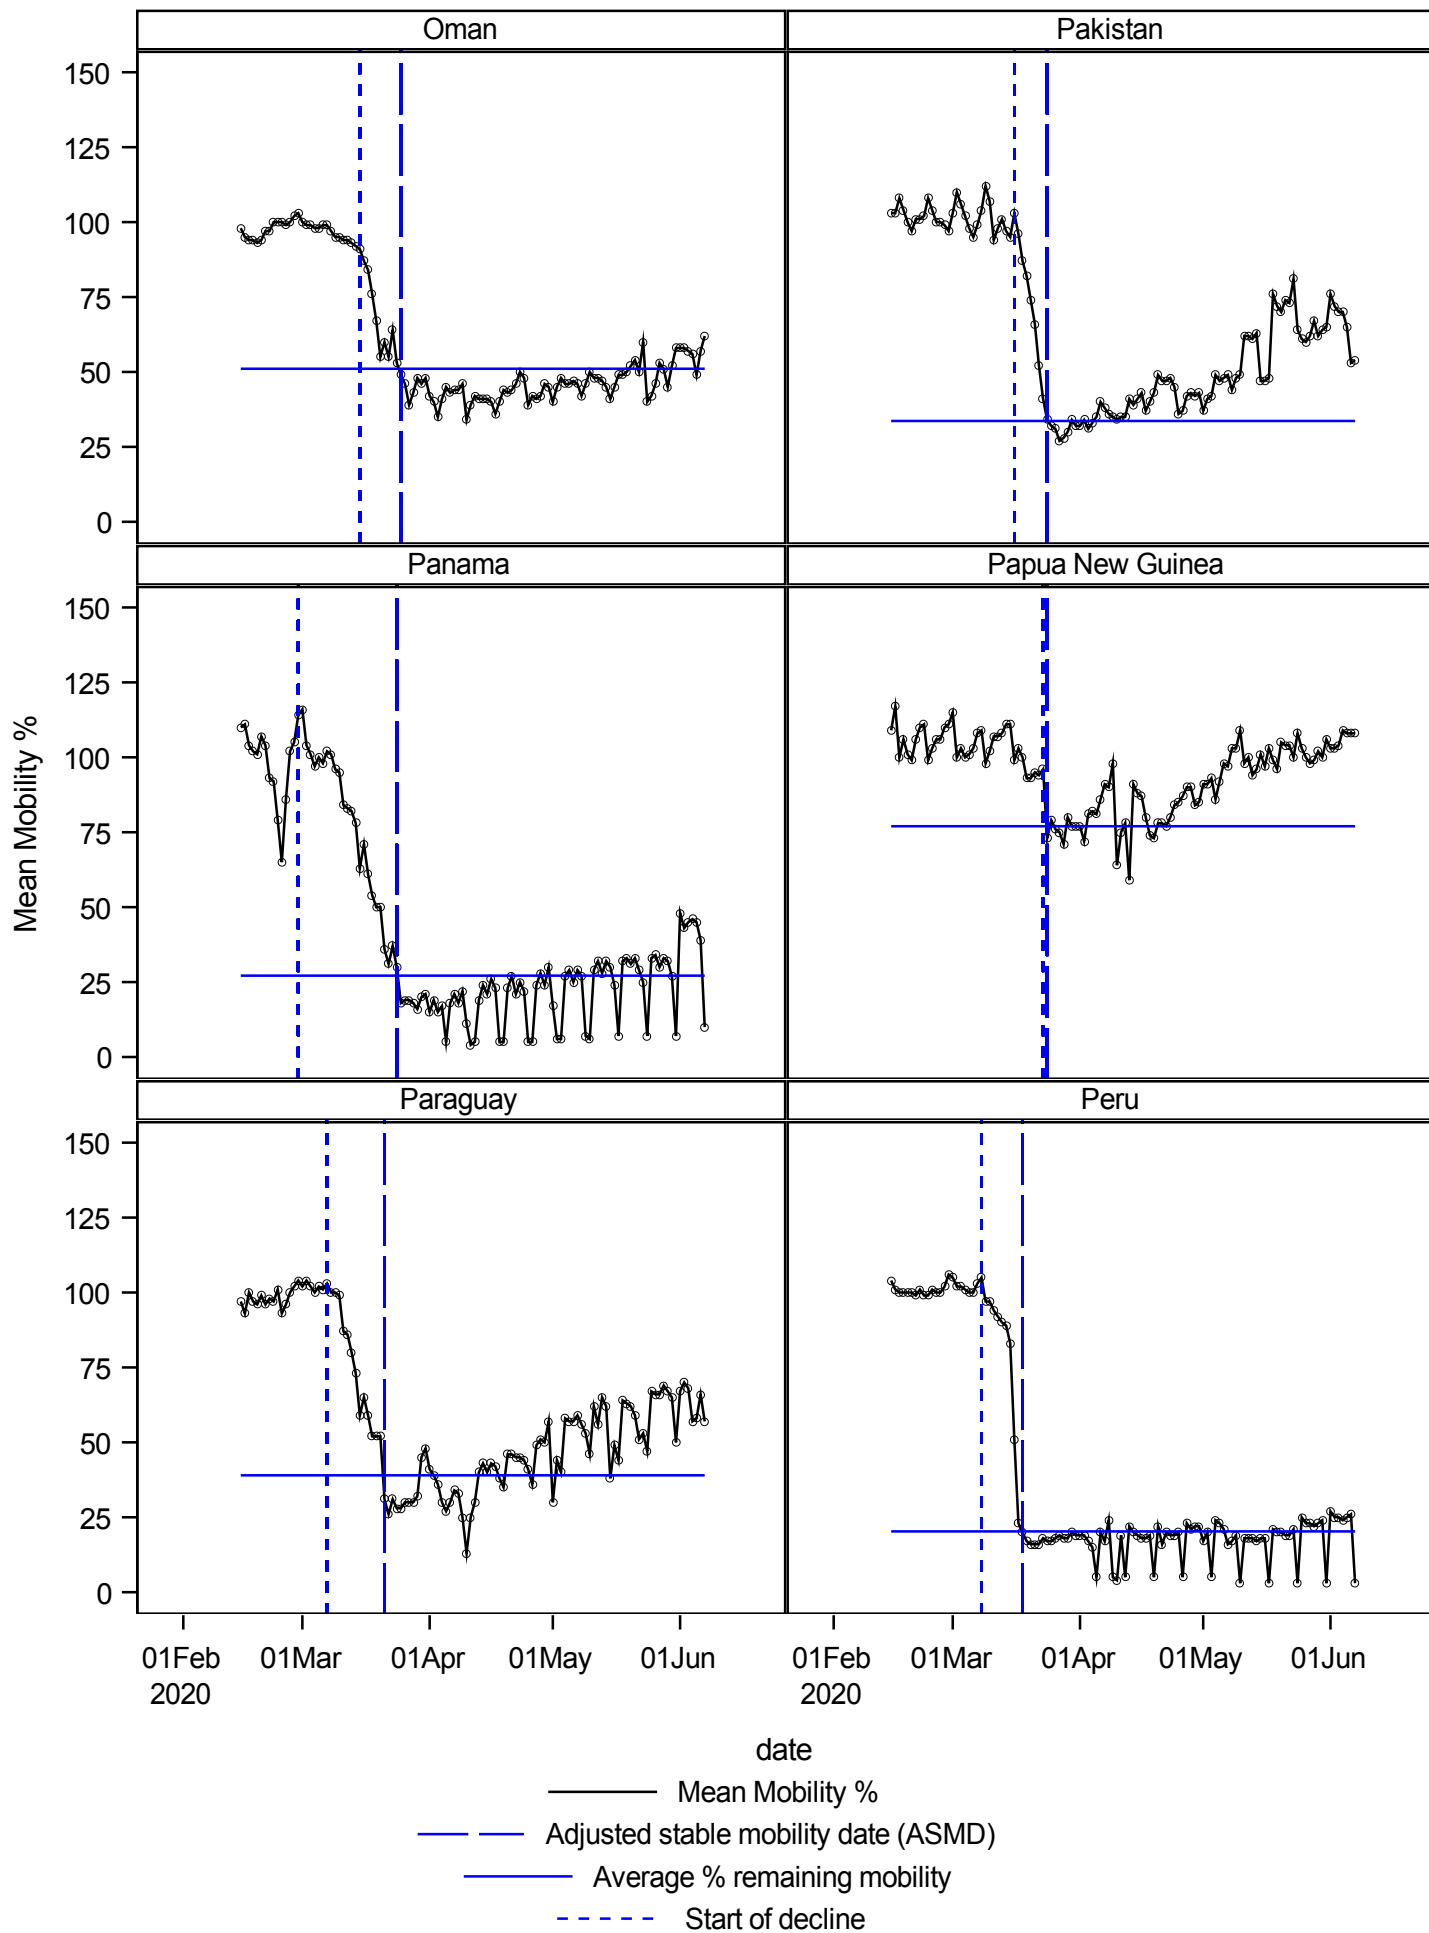

Supplementary Figures 2 Google RAR mobility profiles per country

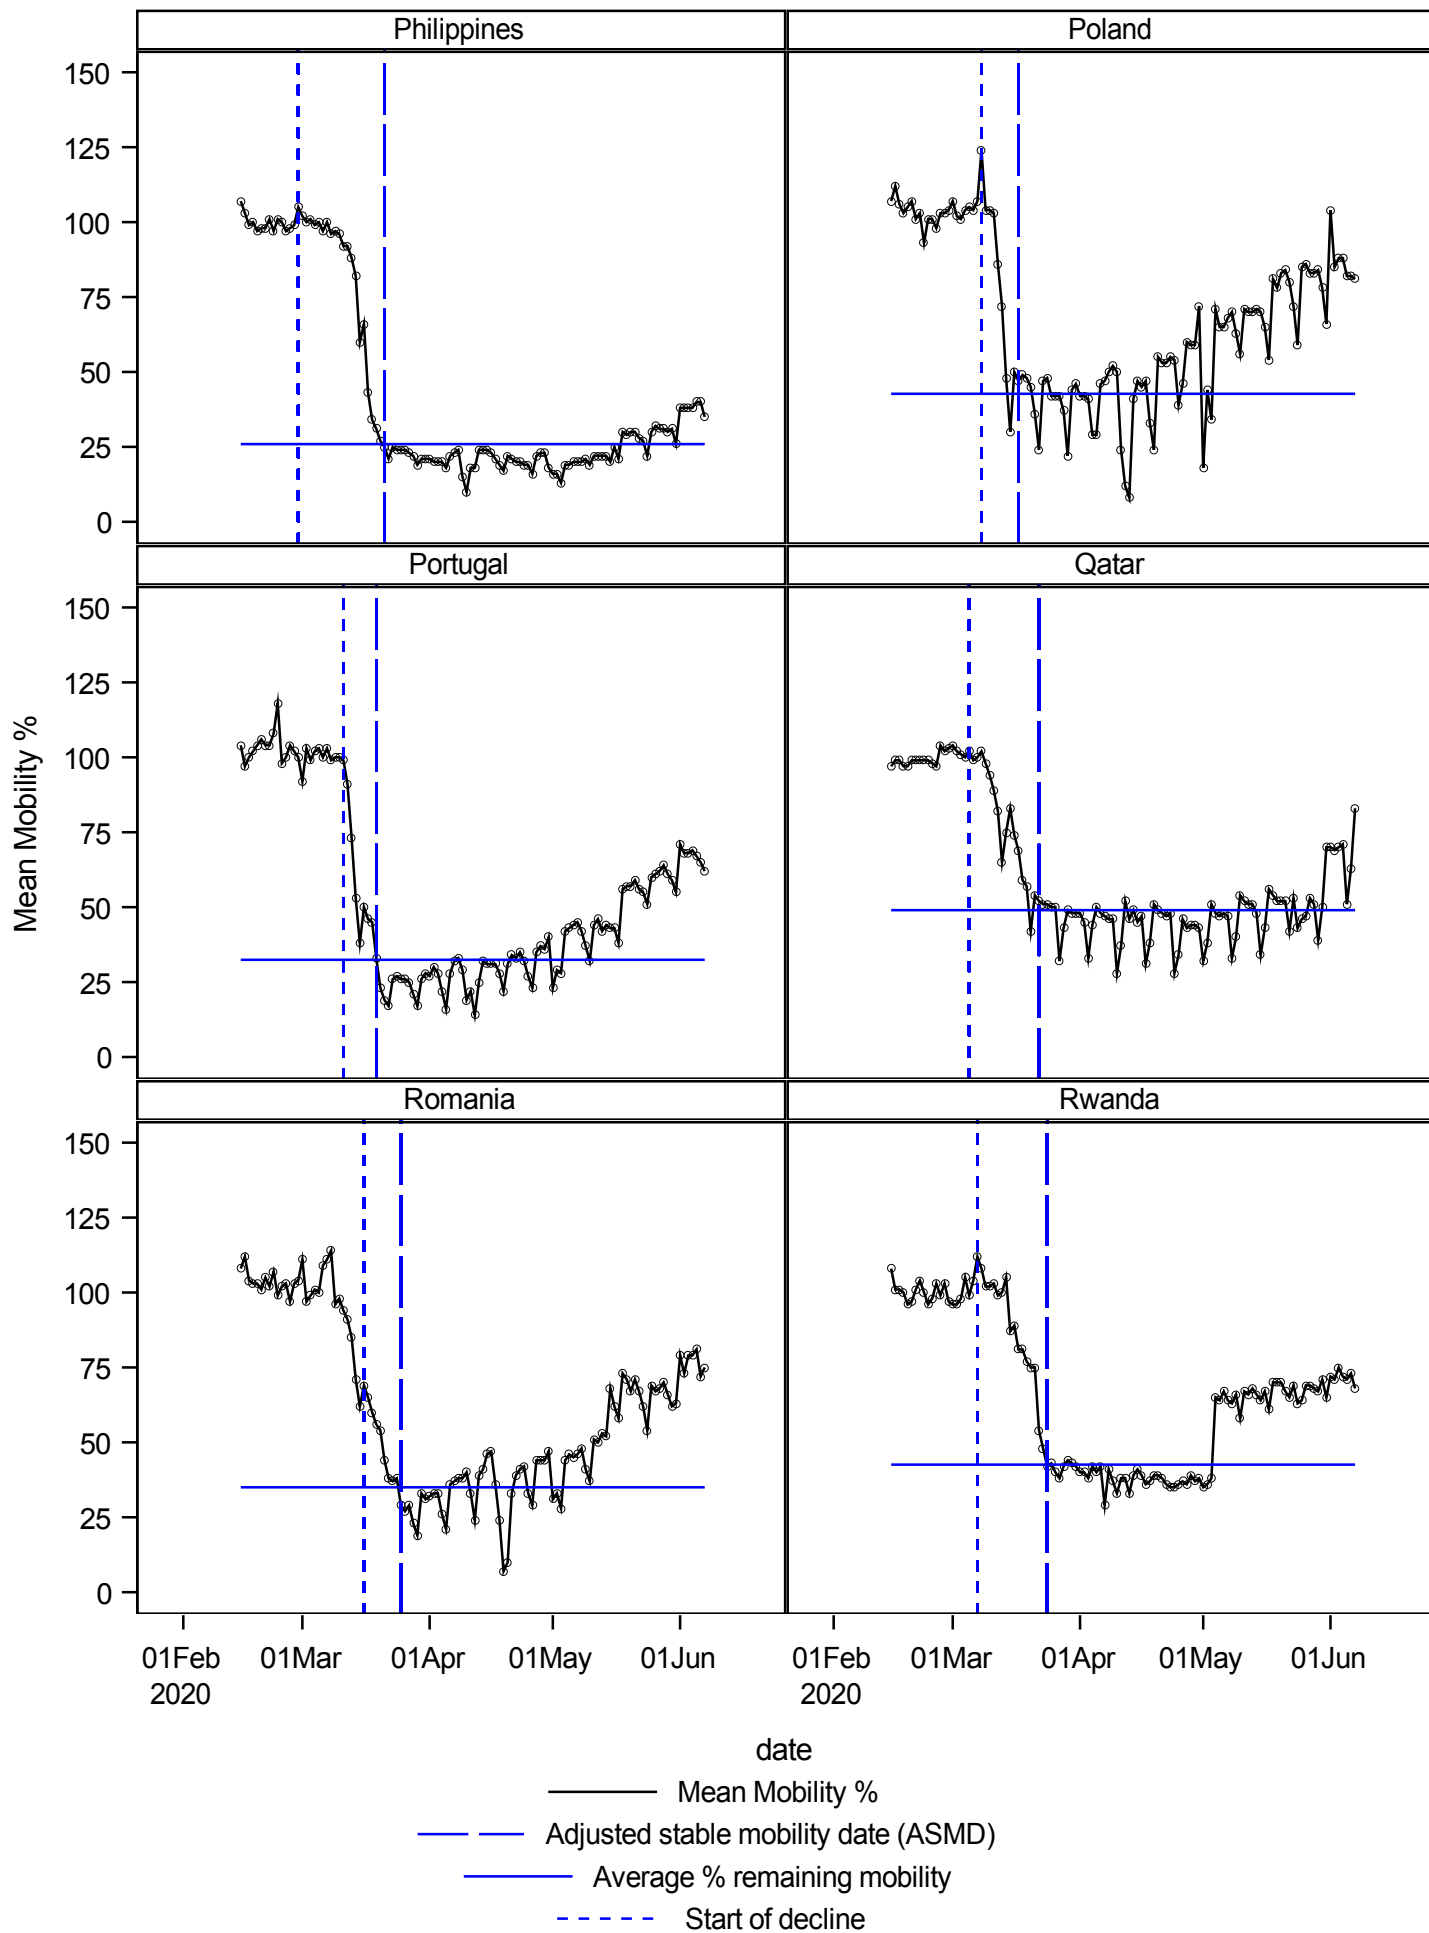

Supplementary Figures 2 Google RAR mobility profiles per country

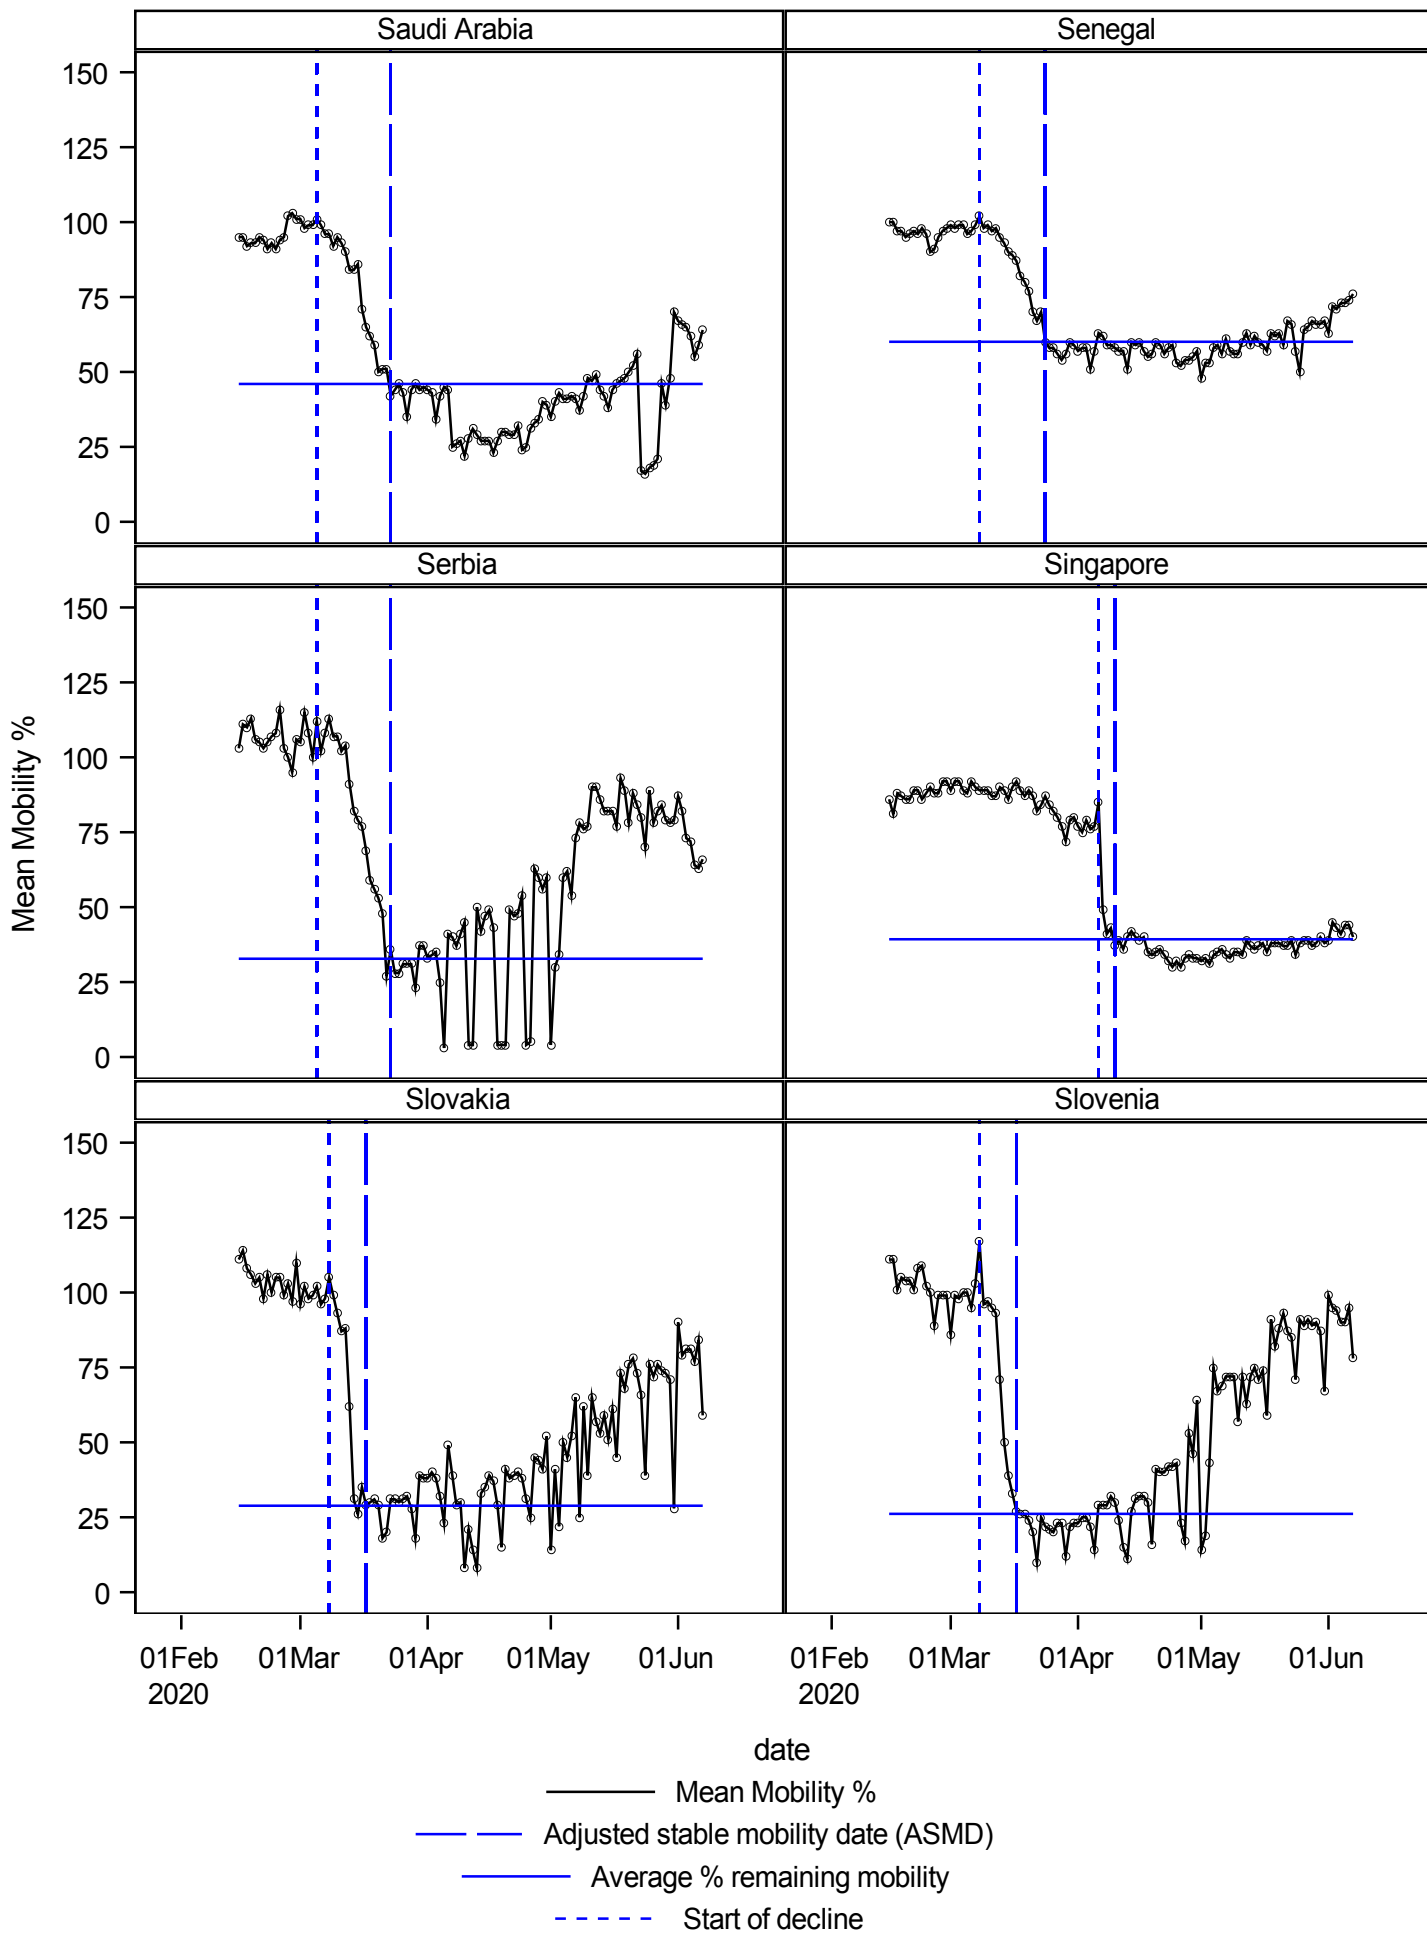

Supplementary Figures 2 Google RAR mobility profiles per country

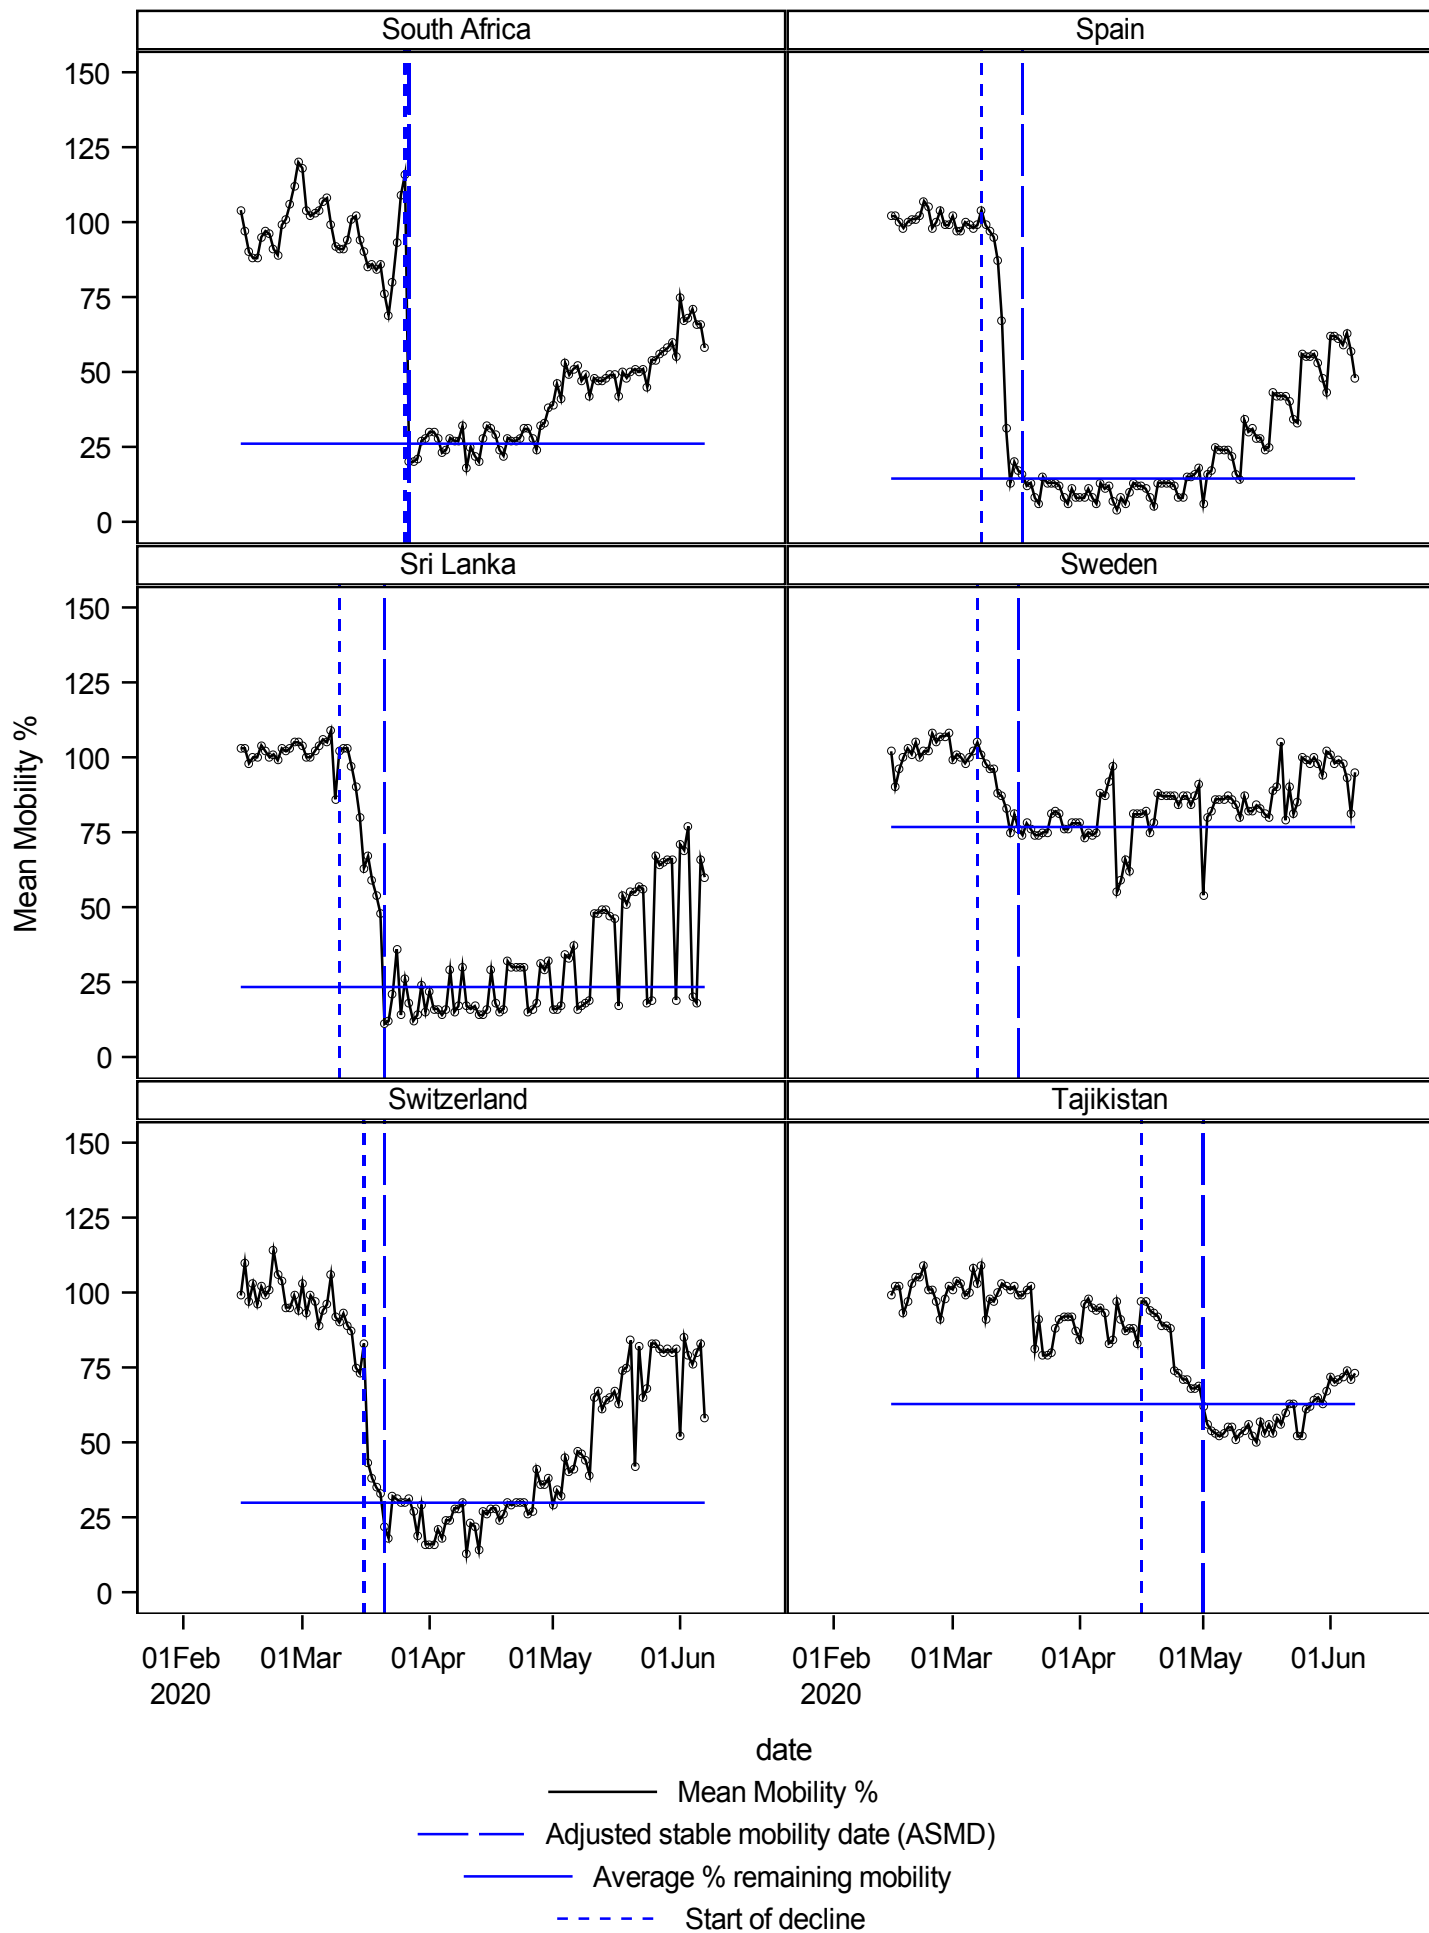

Supplementary Figures 2 Google RAR mobility profiles per country

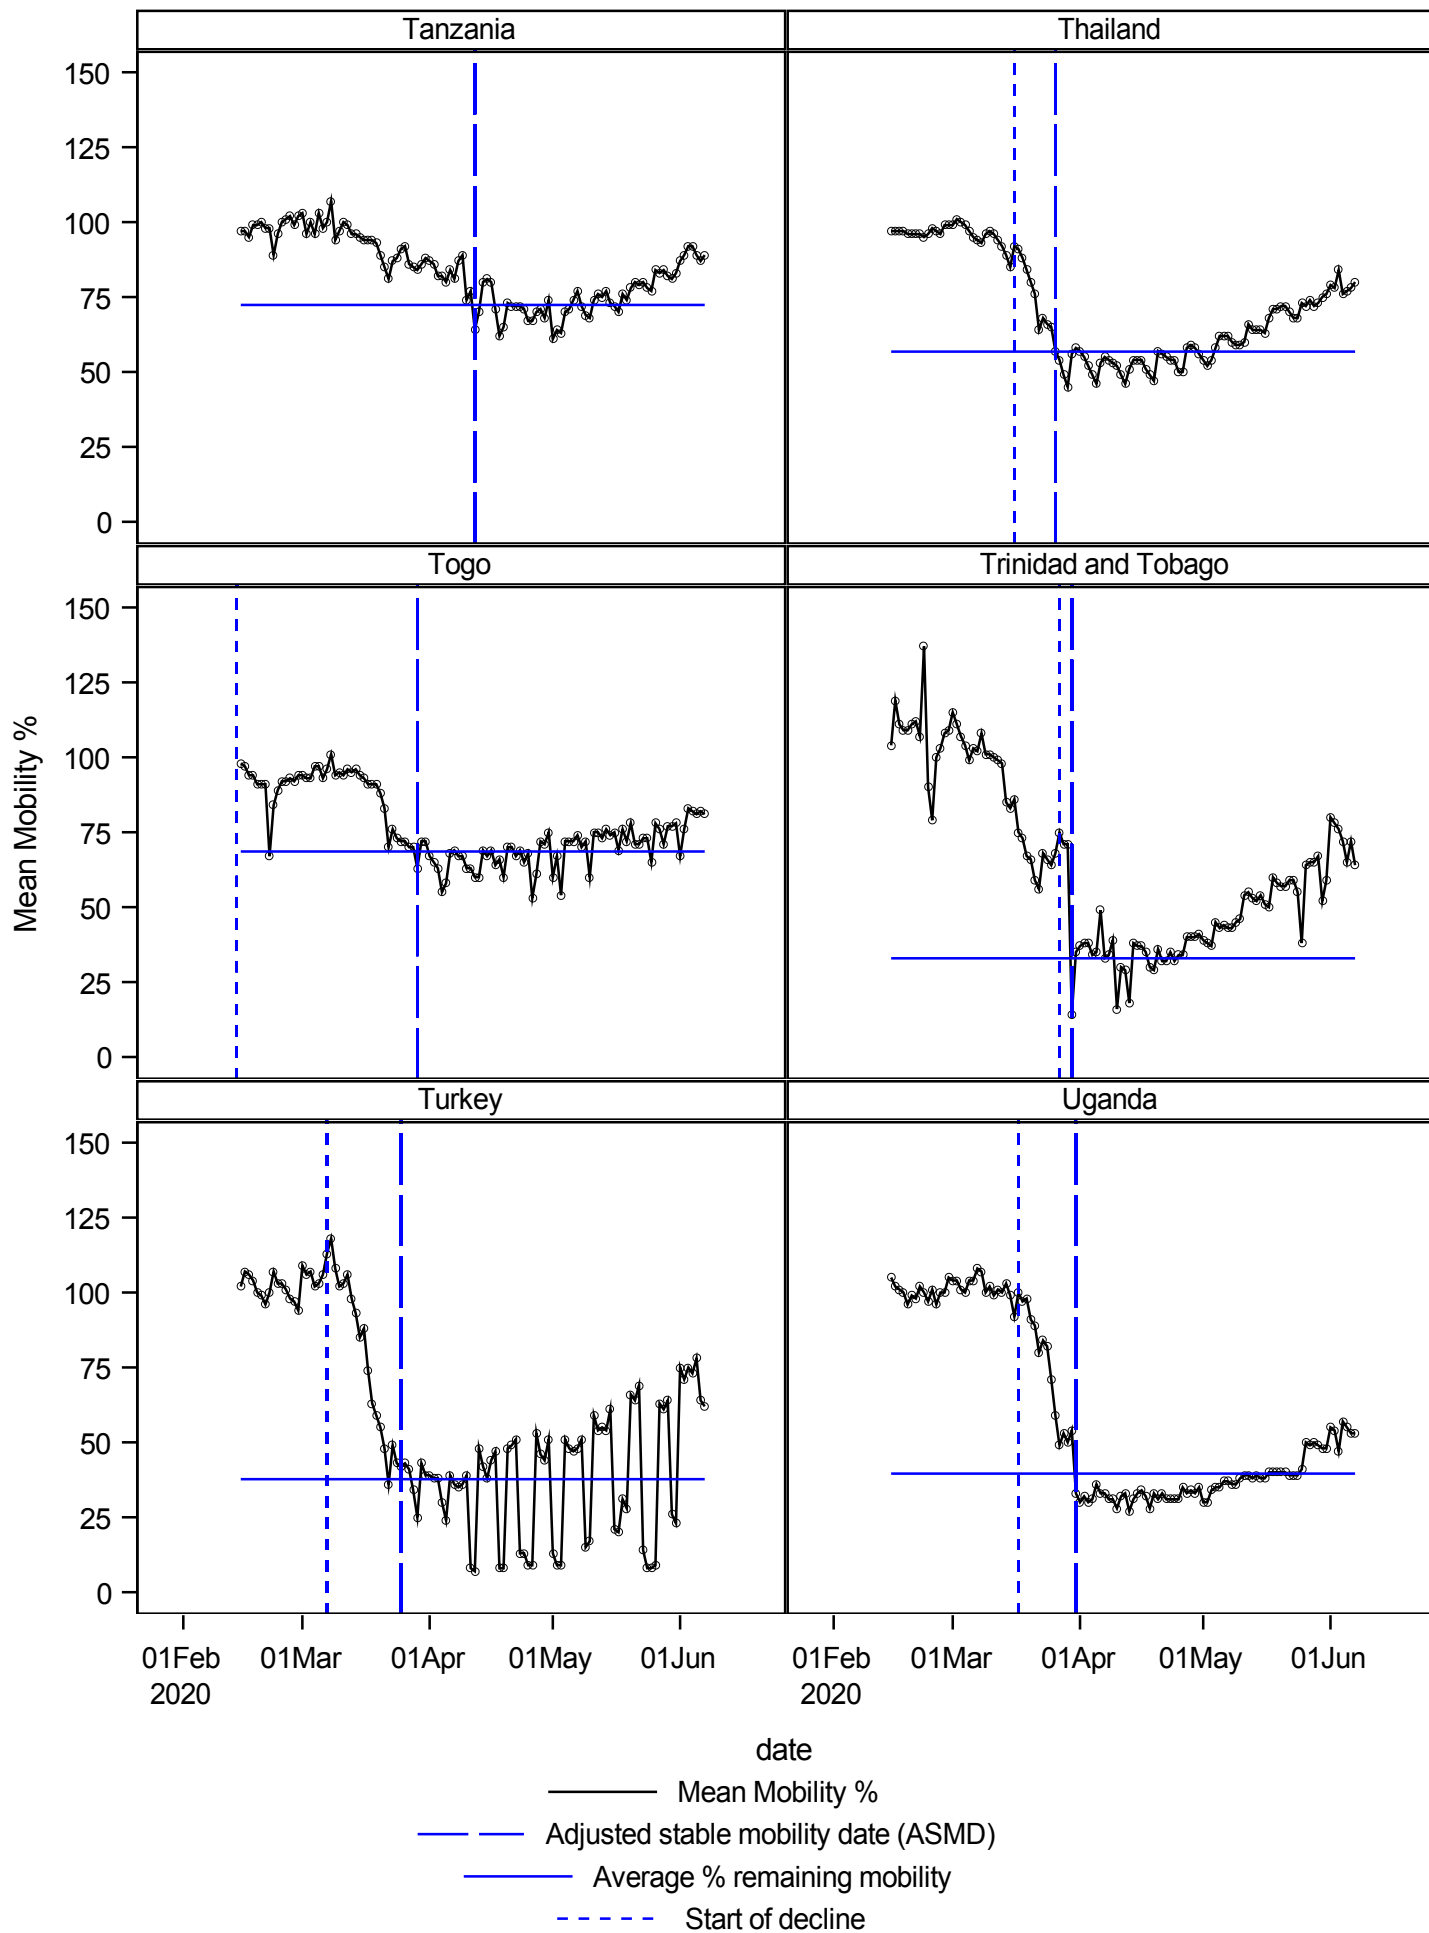

Supplementary Figures 2 Google RAR mobility profiles per country

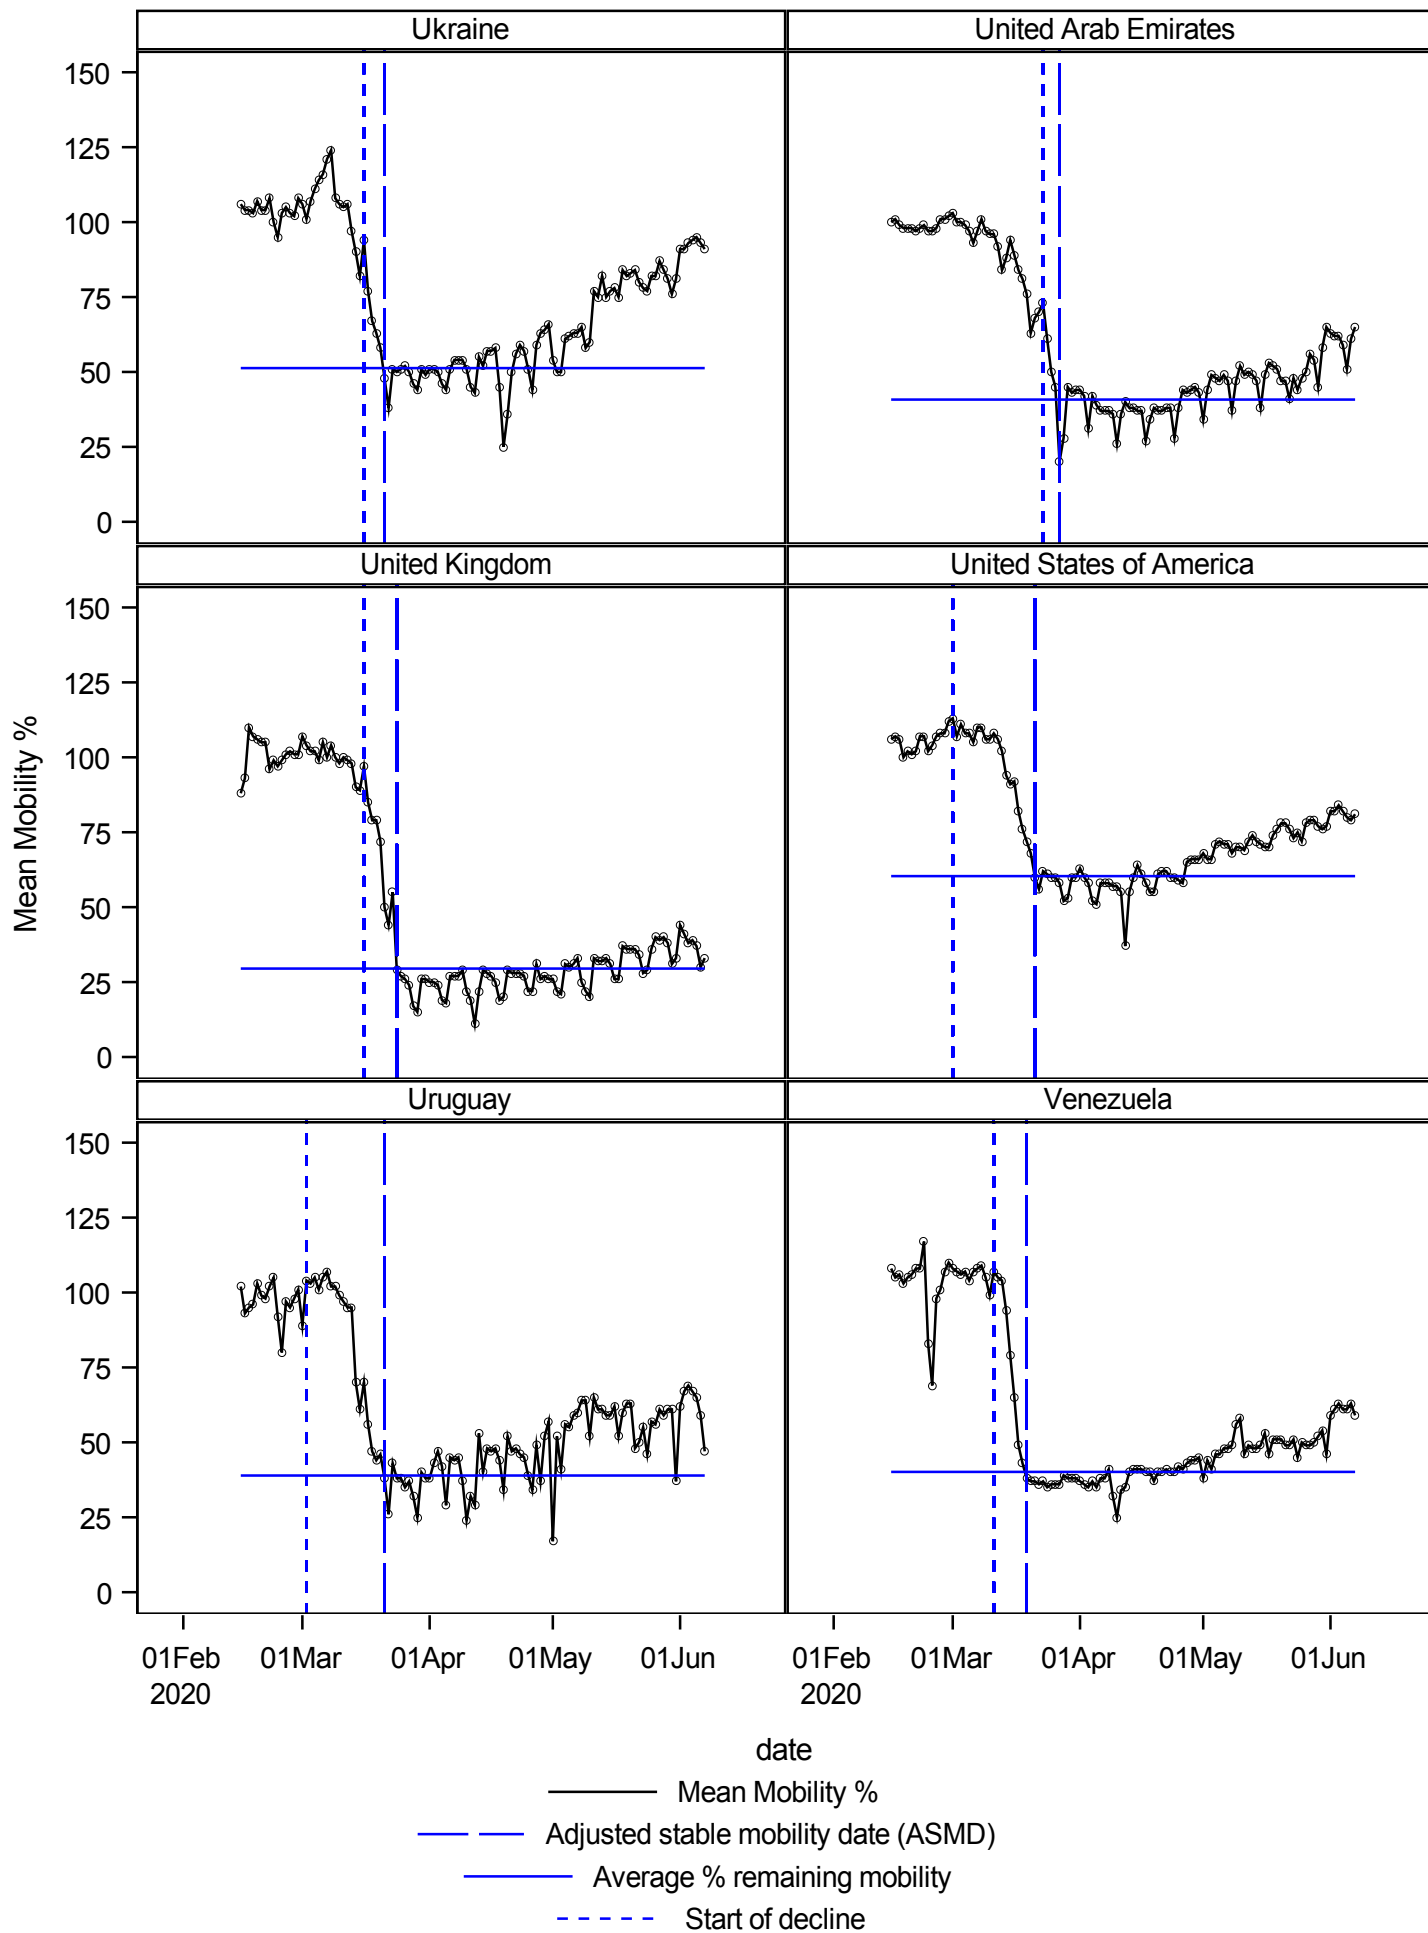

Supplementary Figures 2 Google RAR mobility profiles per country

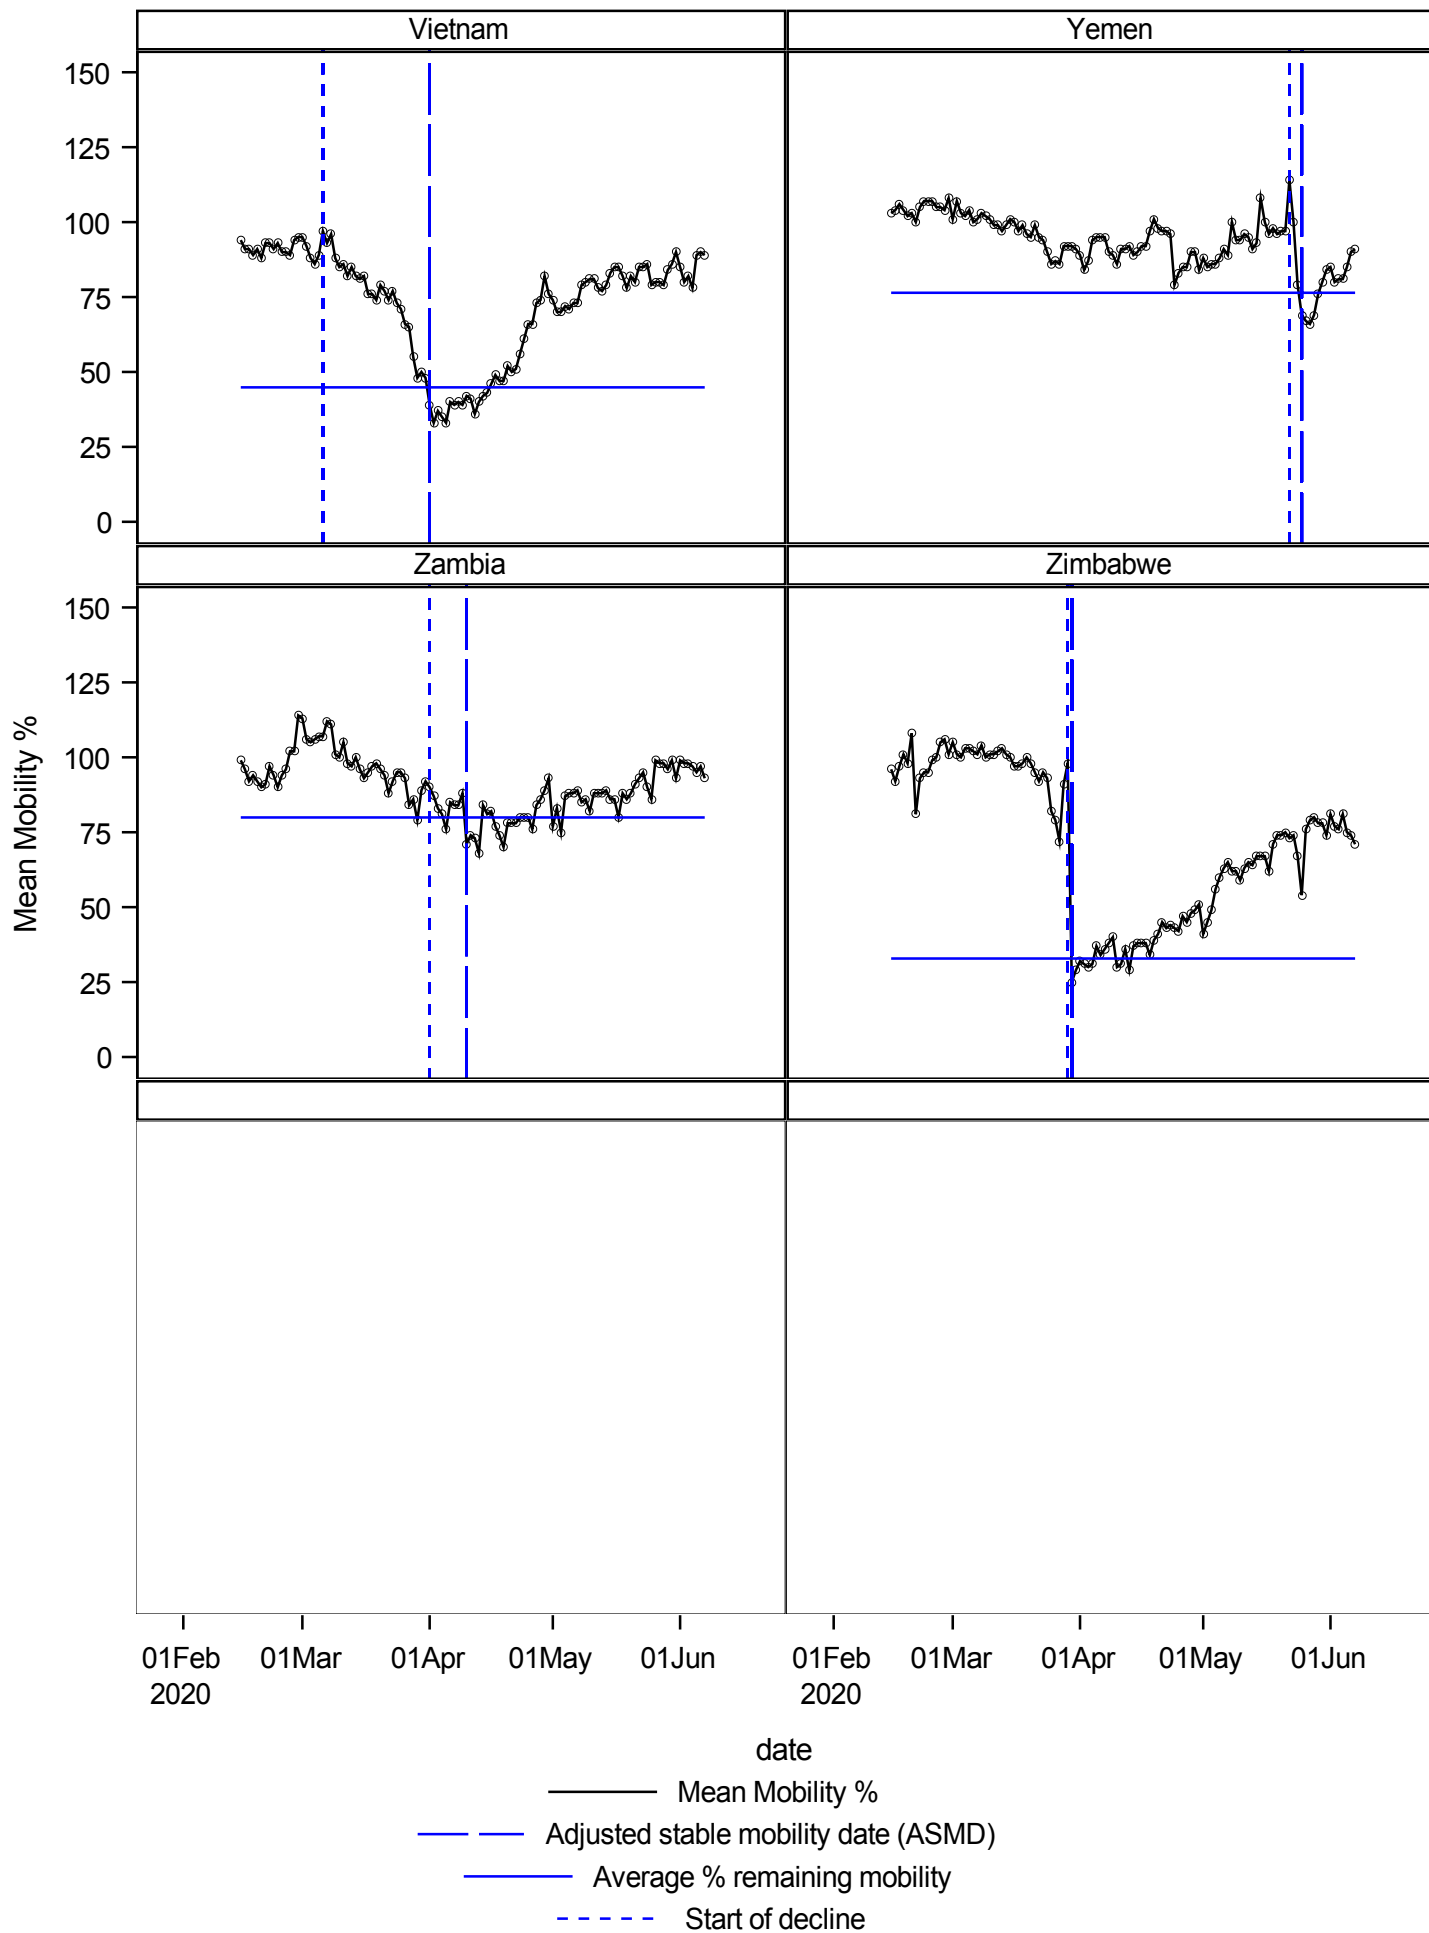

Supplementary Figures 3 Google TS mobility profiles per country

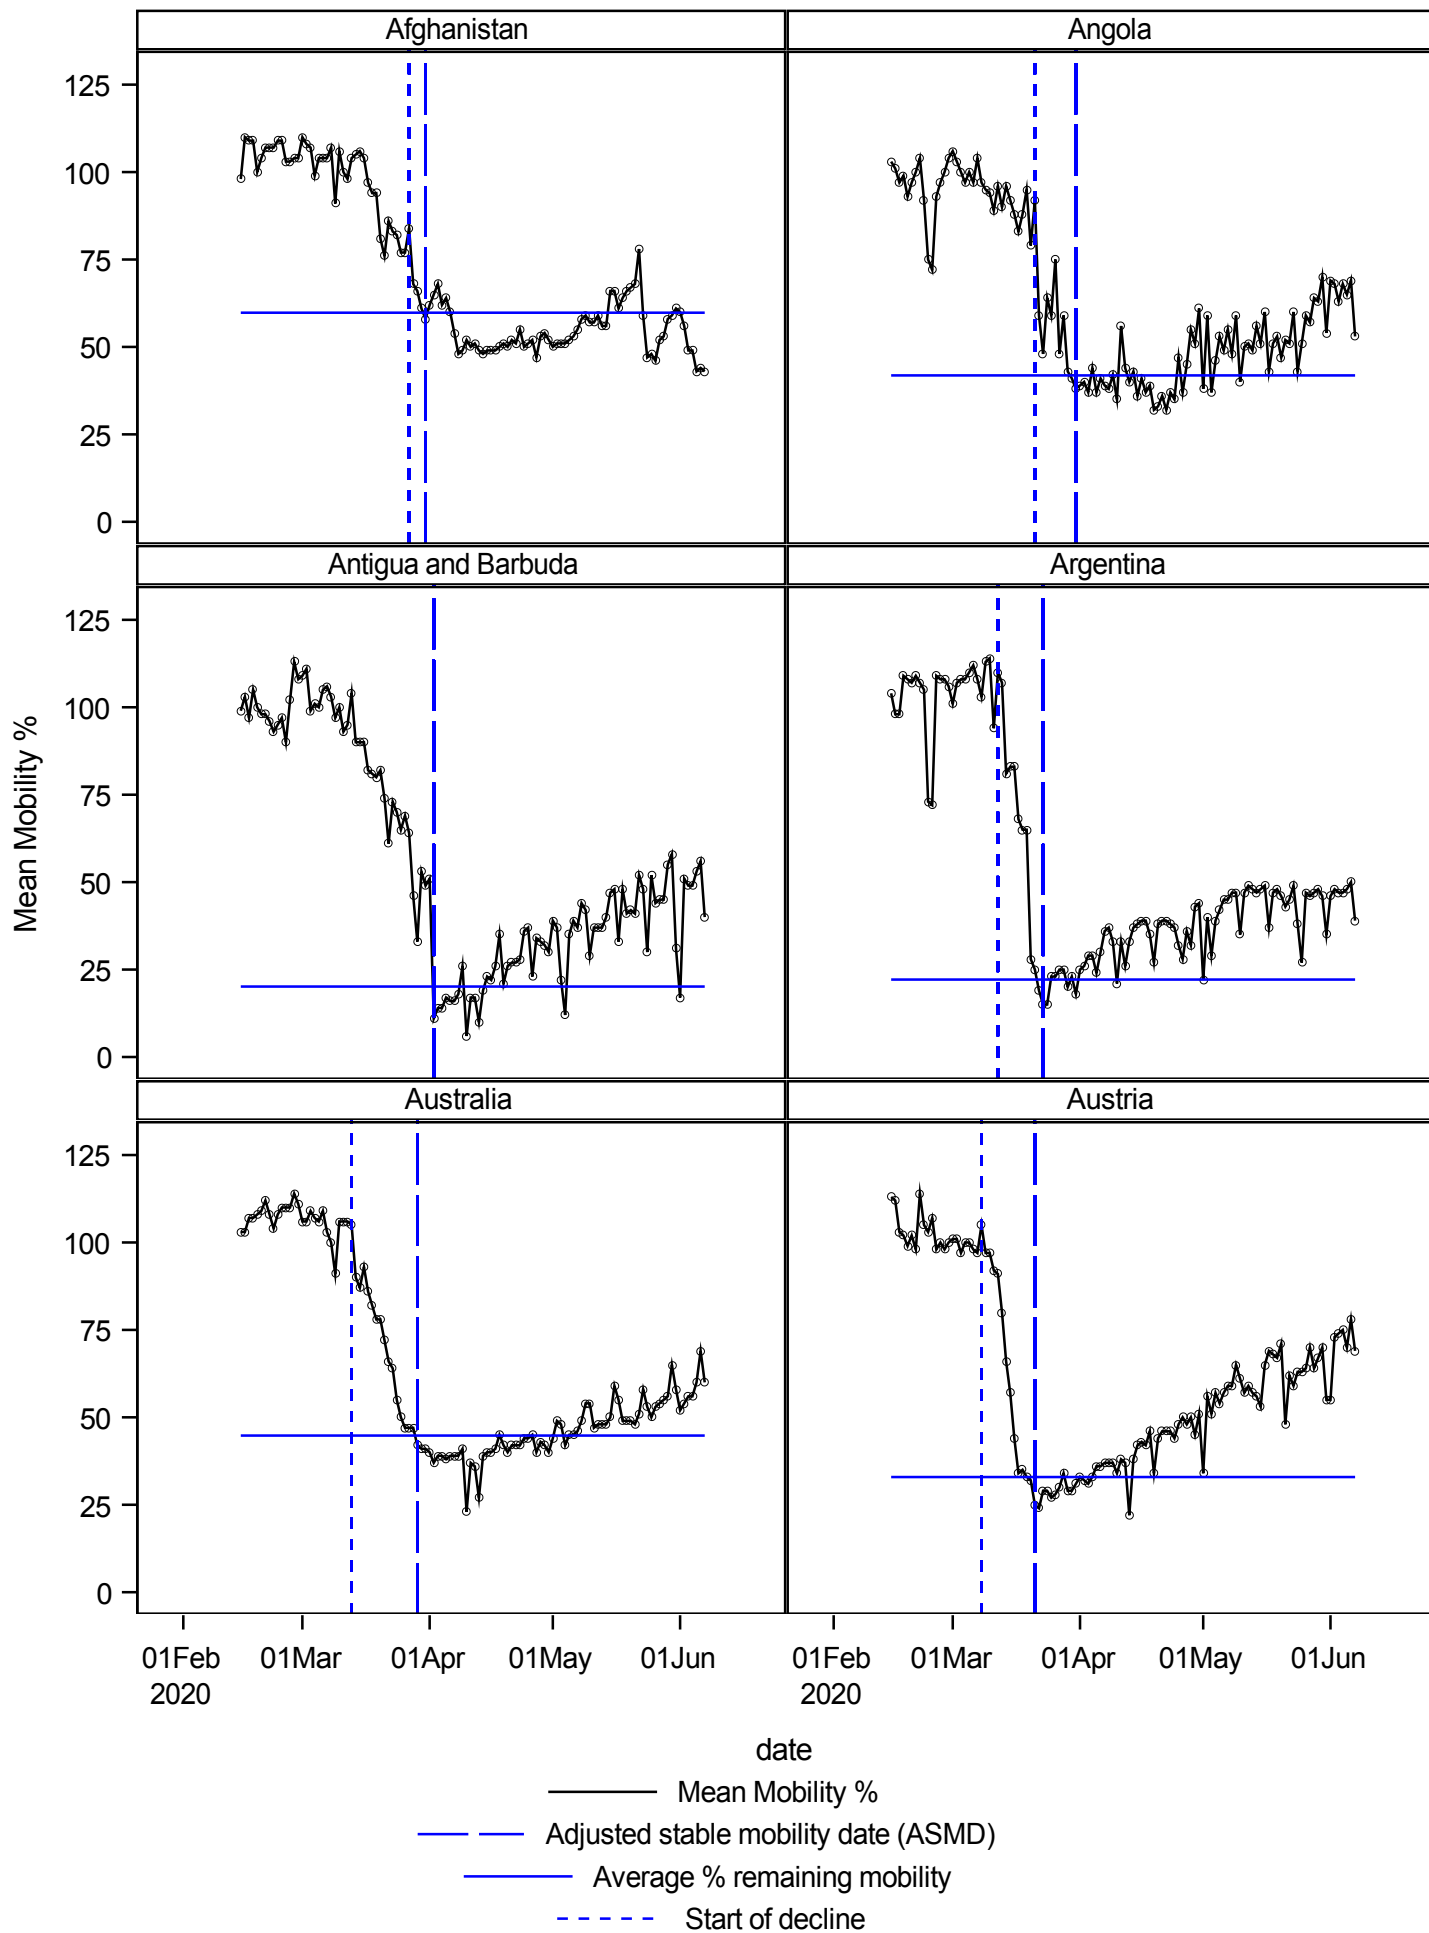



Supplementary Figures 3 Google TS mobility profiles per country

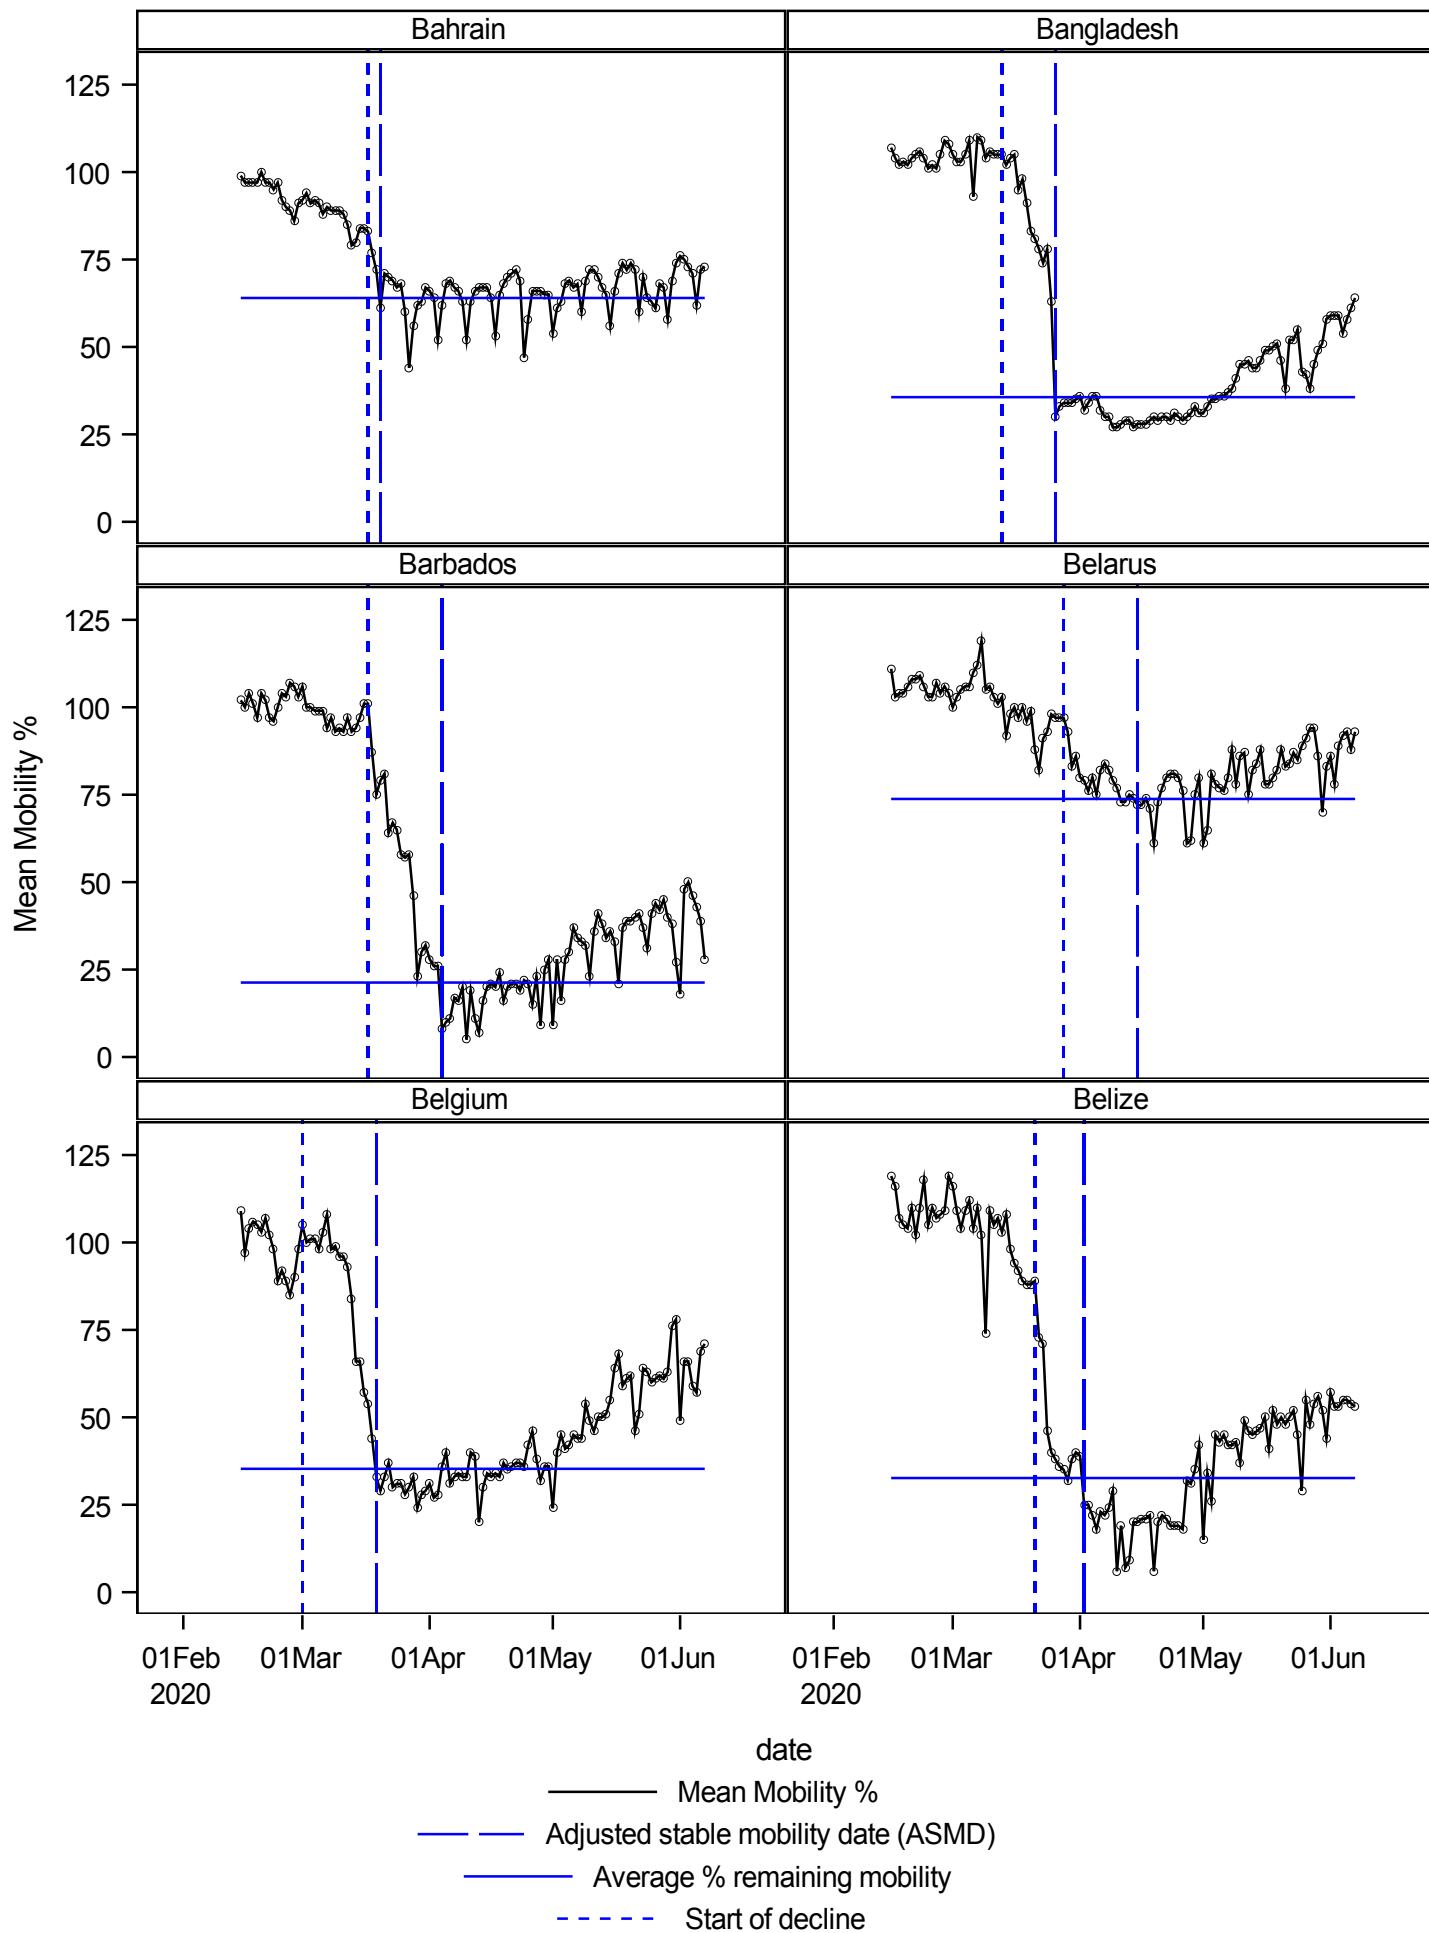

Supplementary Figures 3 Google TS mobility profiles per country

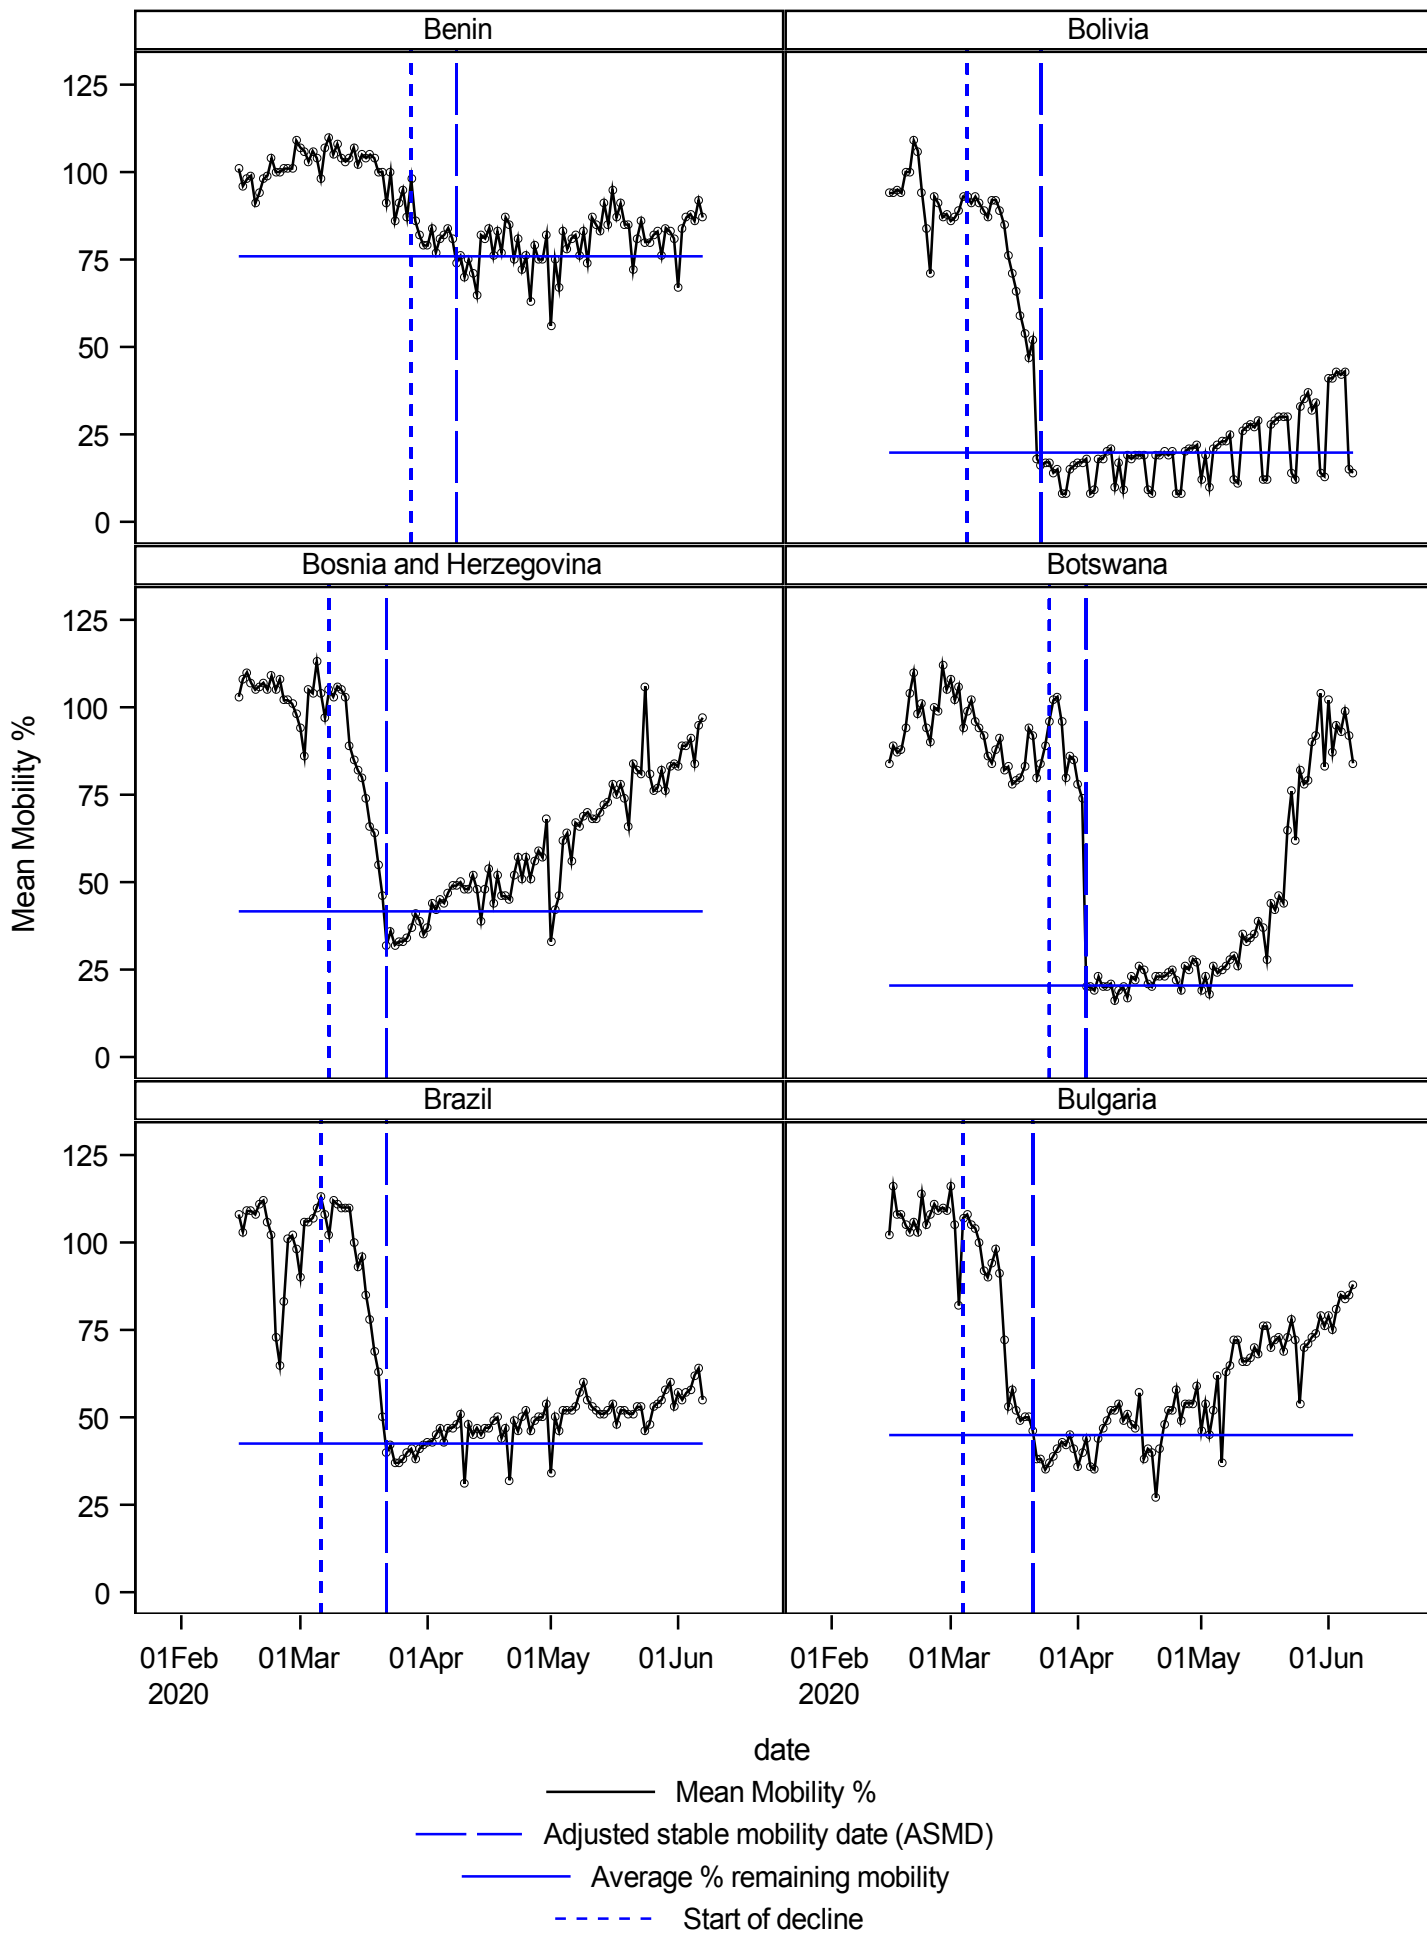

Supplementary Figures 3 Google TS mobility profiles per country

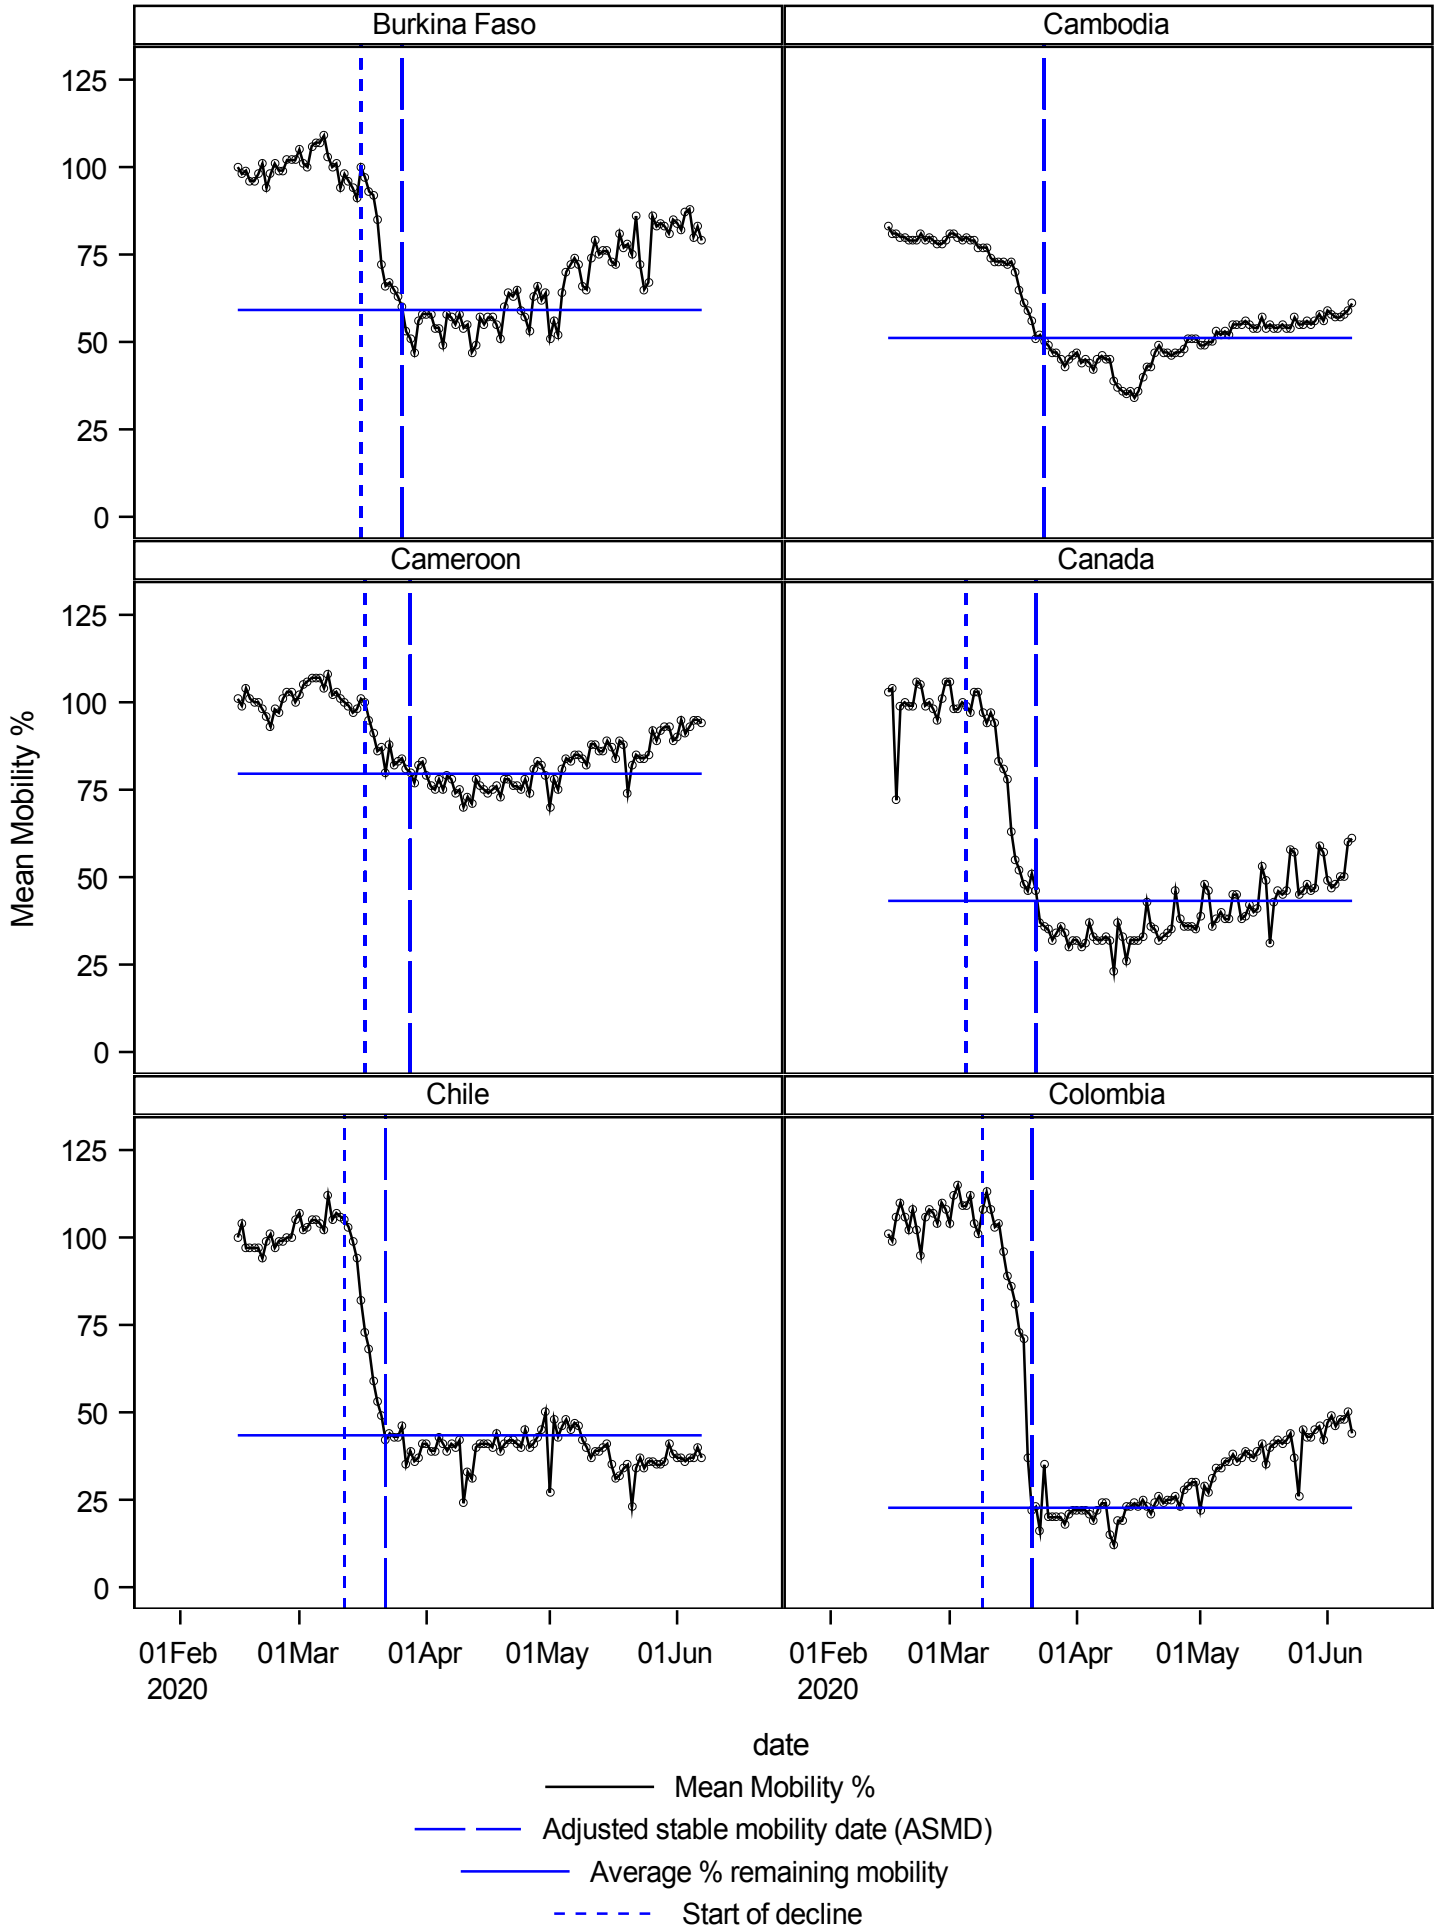

Supplementary Figures 3 Google TS mobility profiles per country

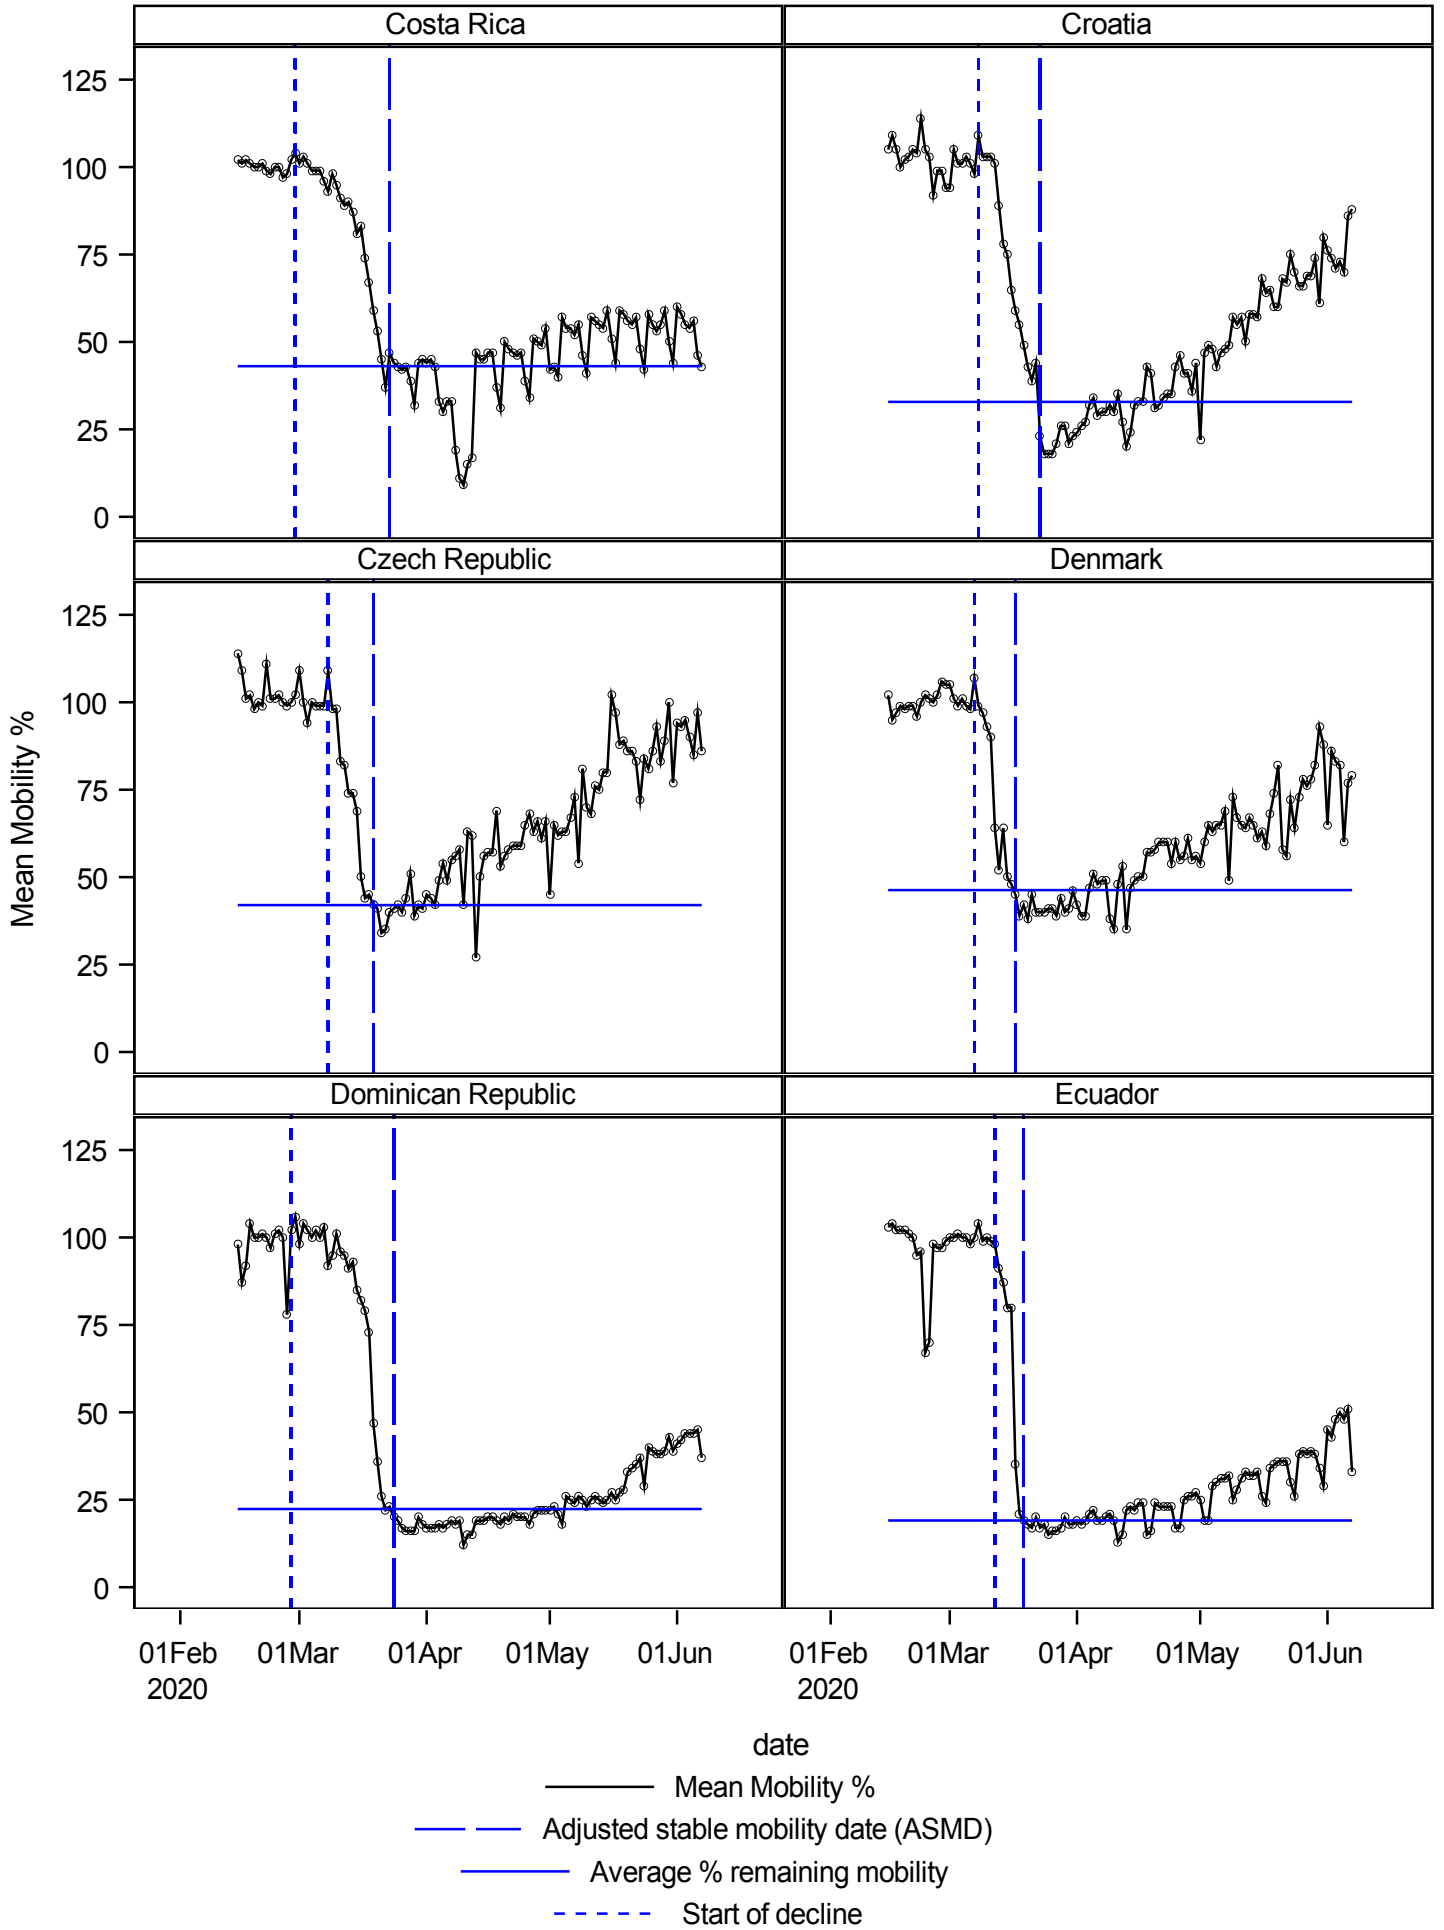

Supplementary Figures 3 Google TS mobility profiles per country

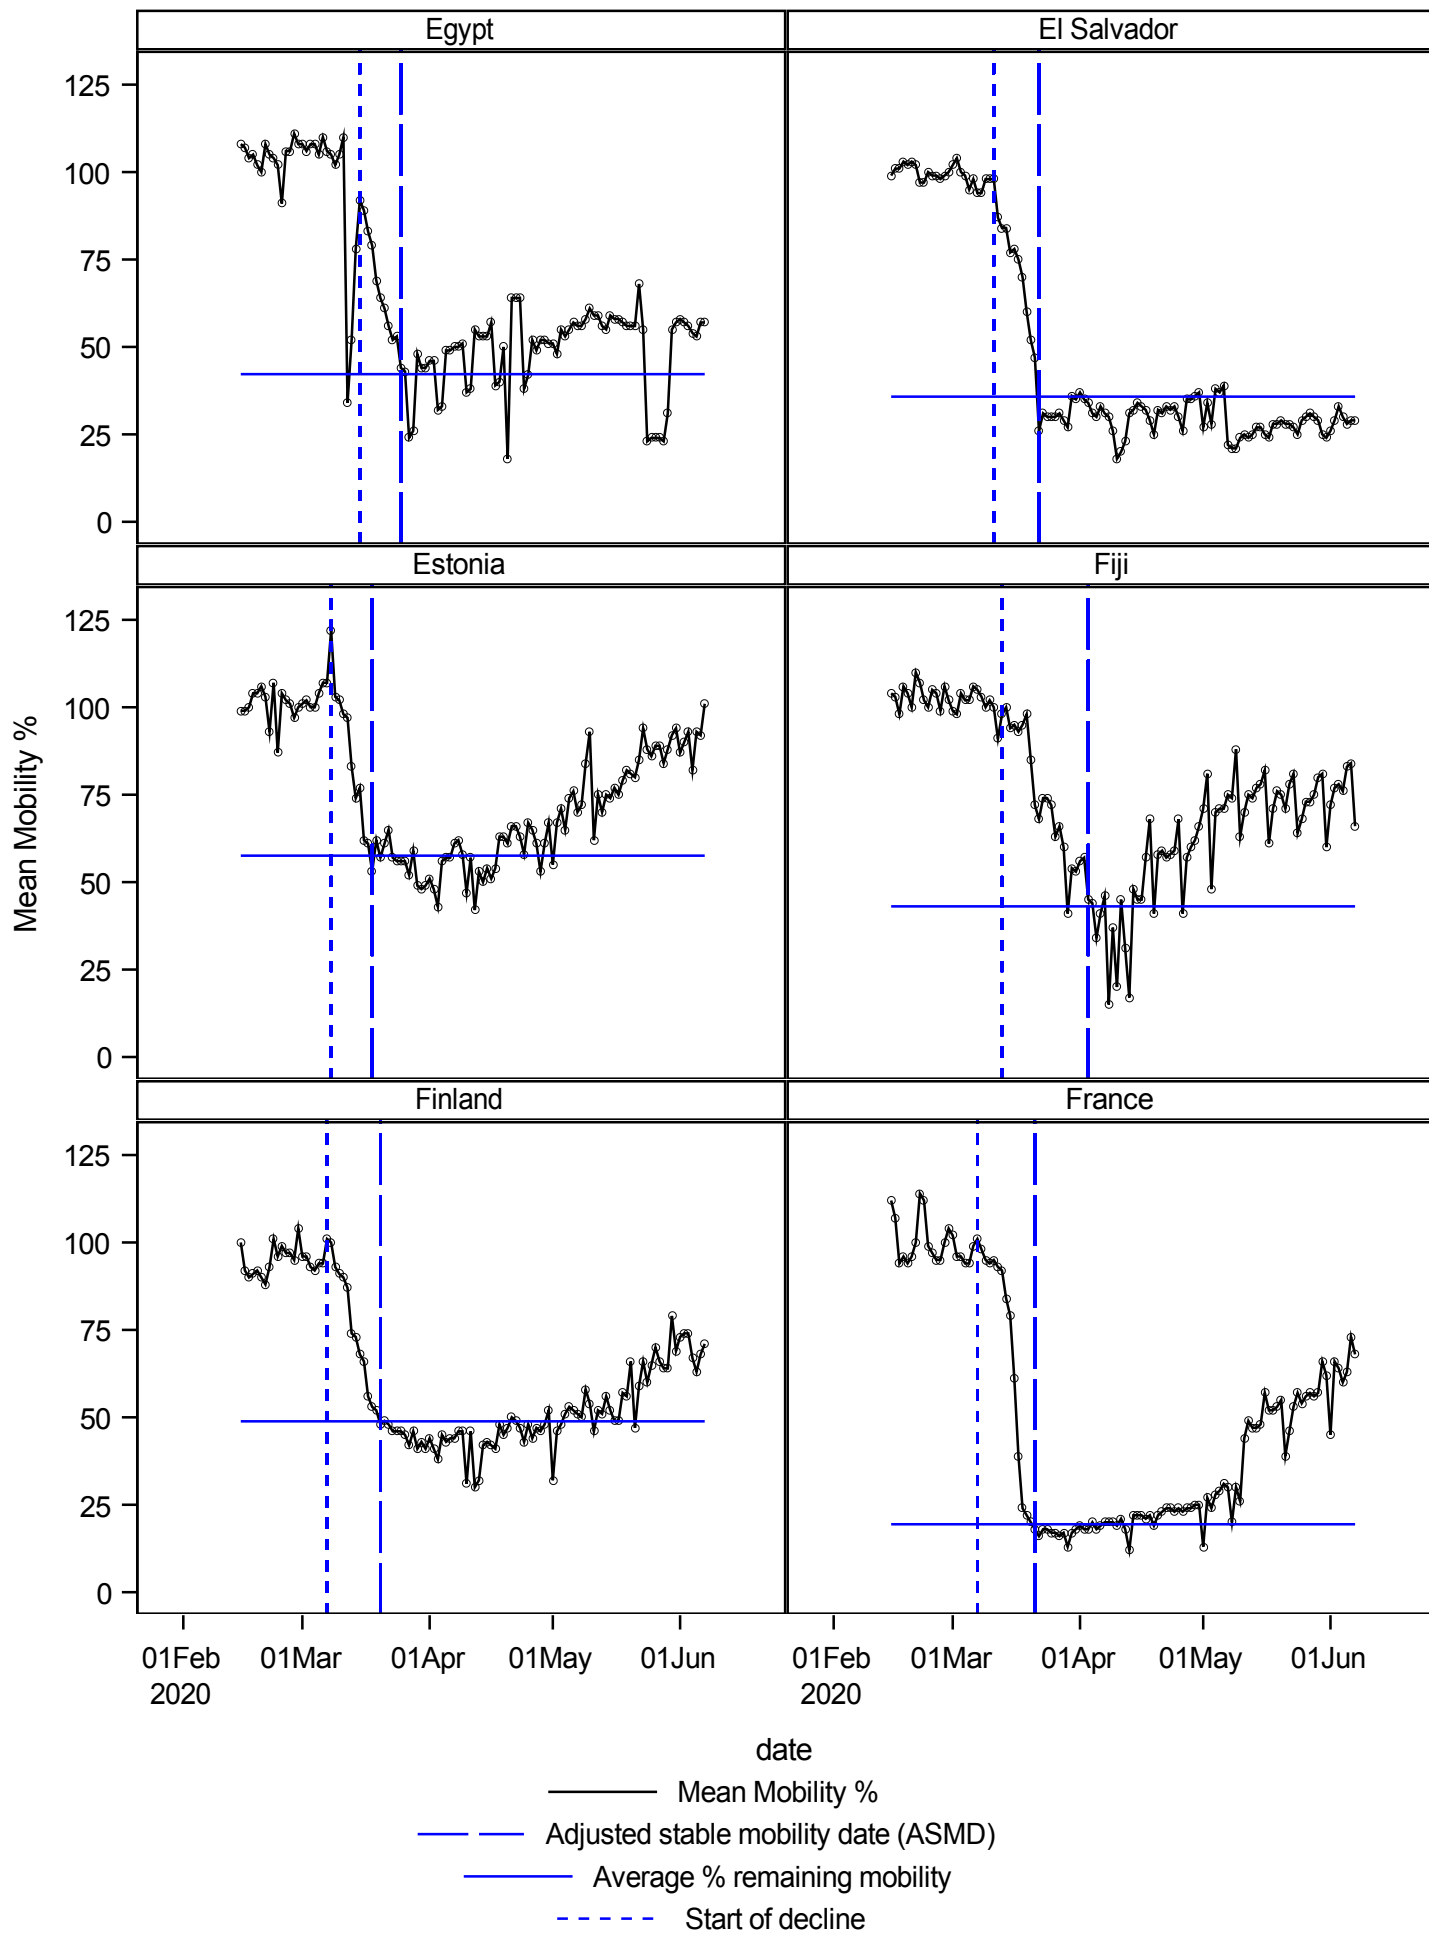

Supplementary Figures 3 Google TS mobility profiles per country

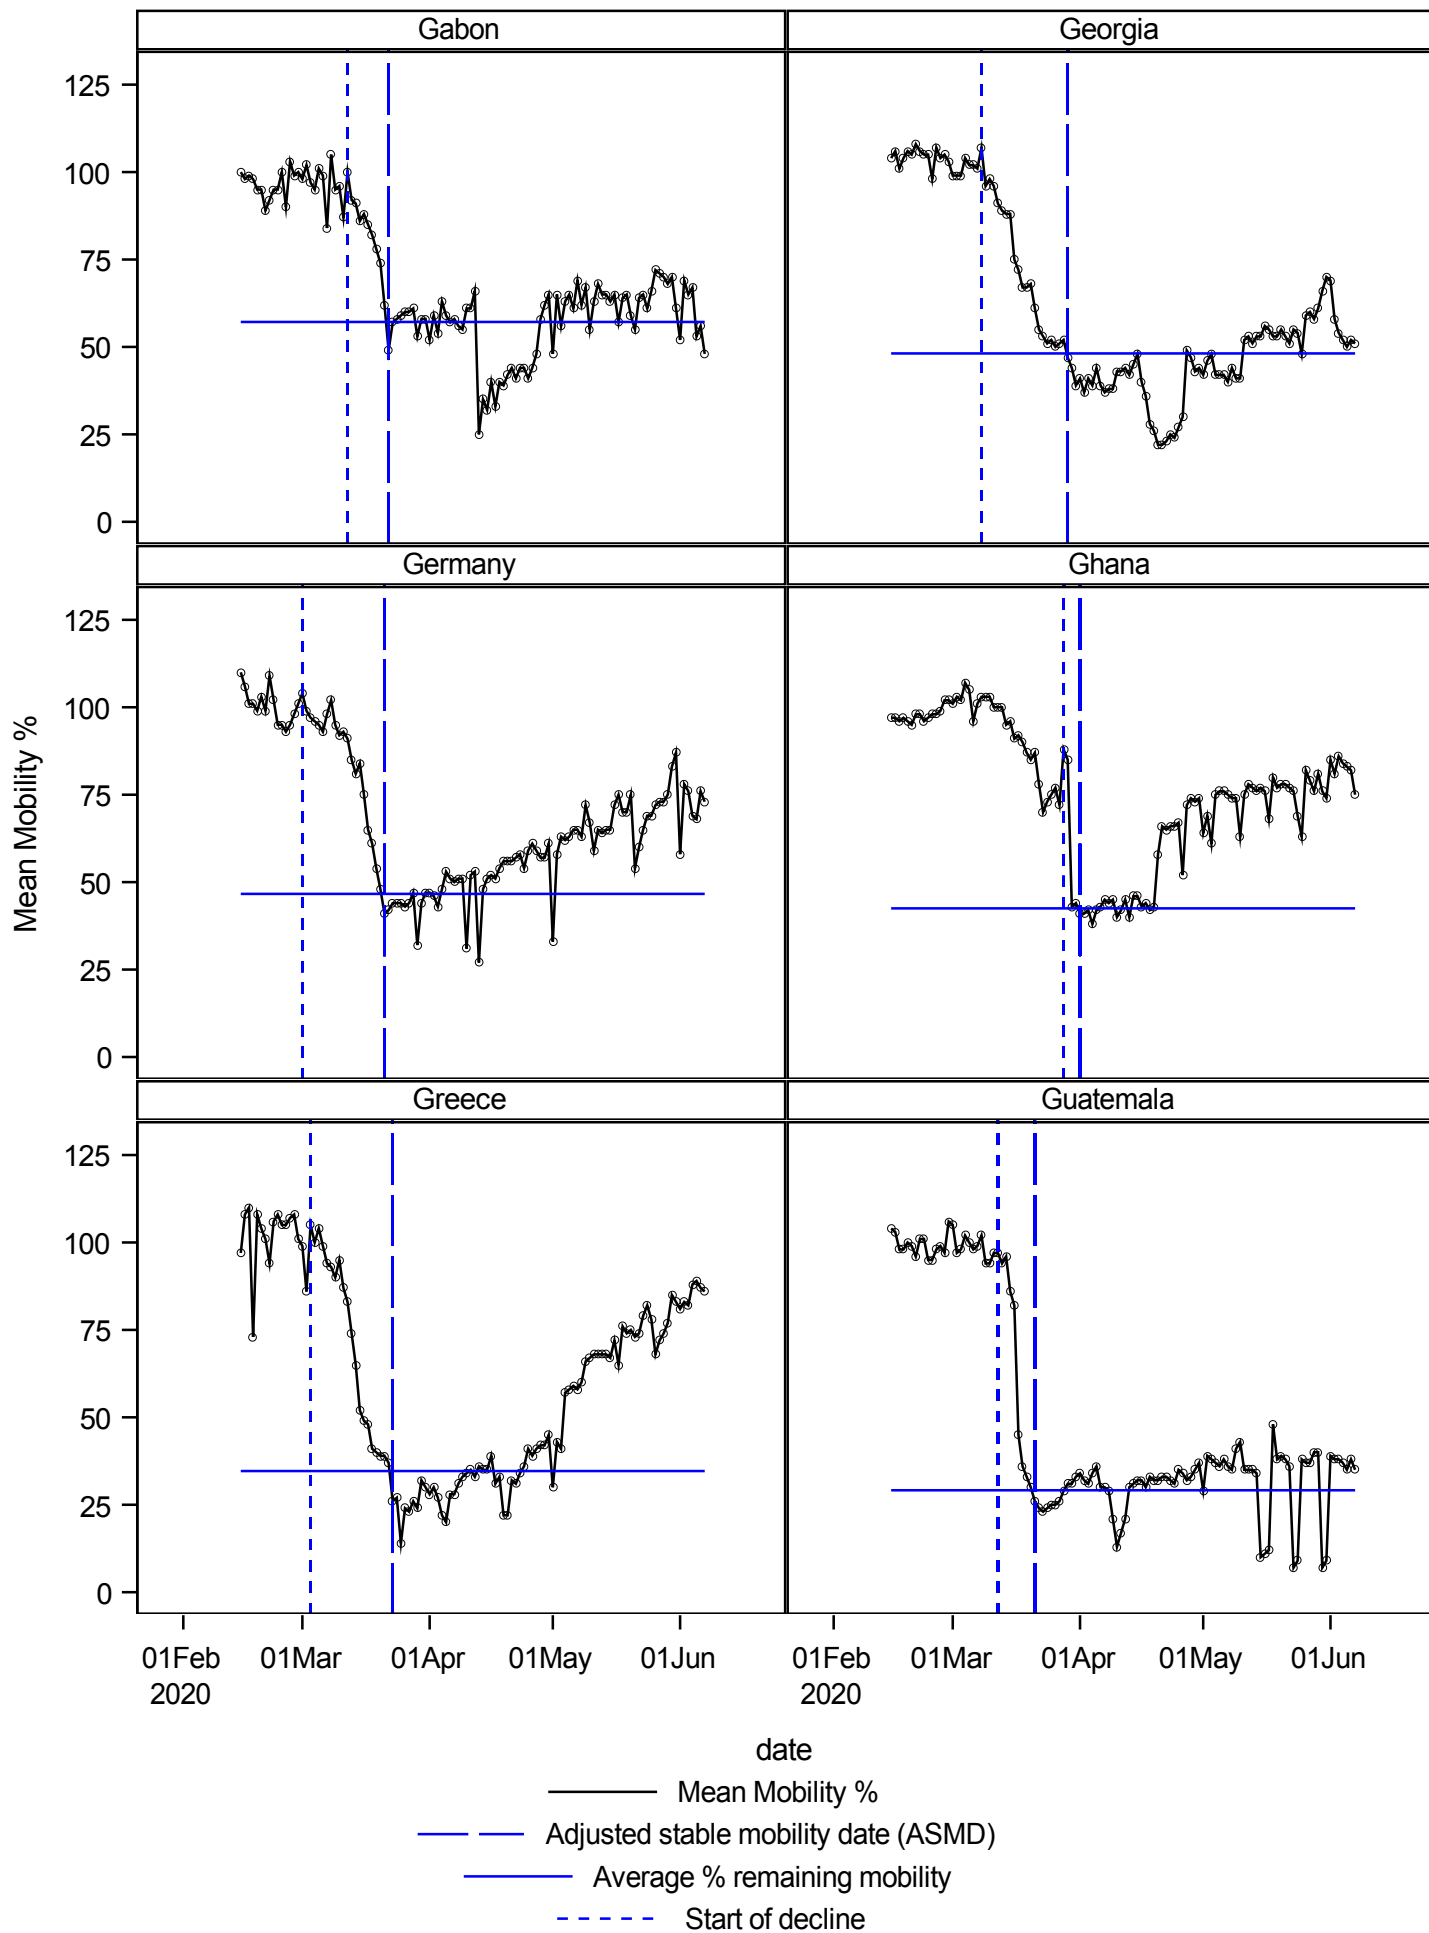

Supplementary Figures 3 Google TS mobility profiles per country

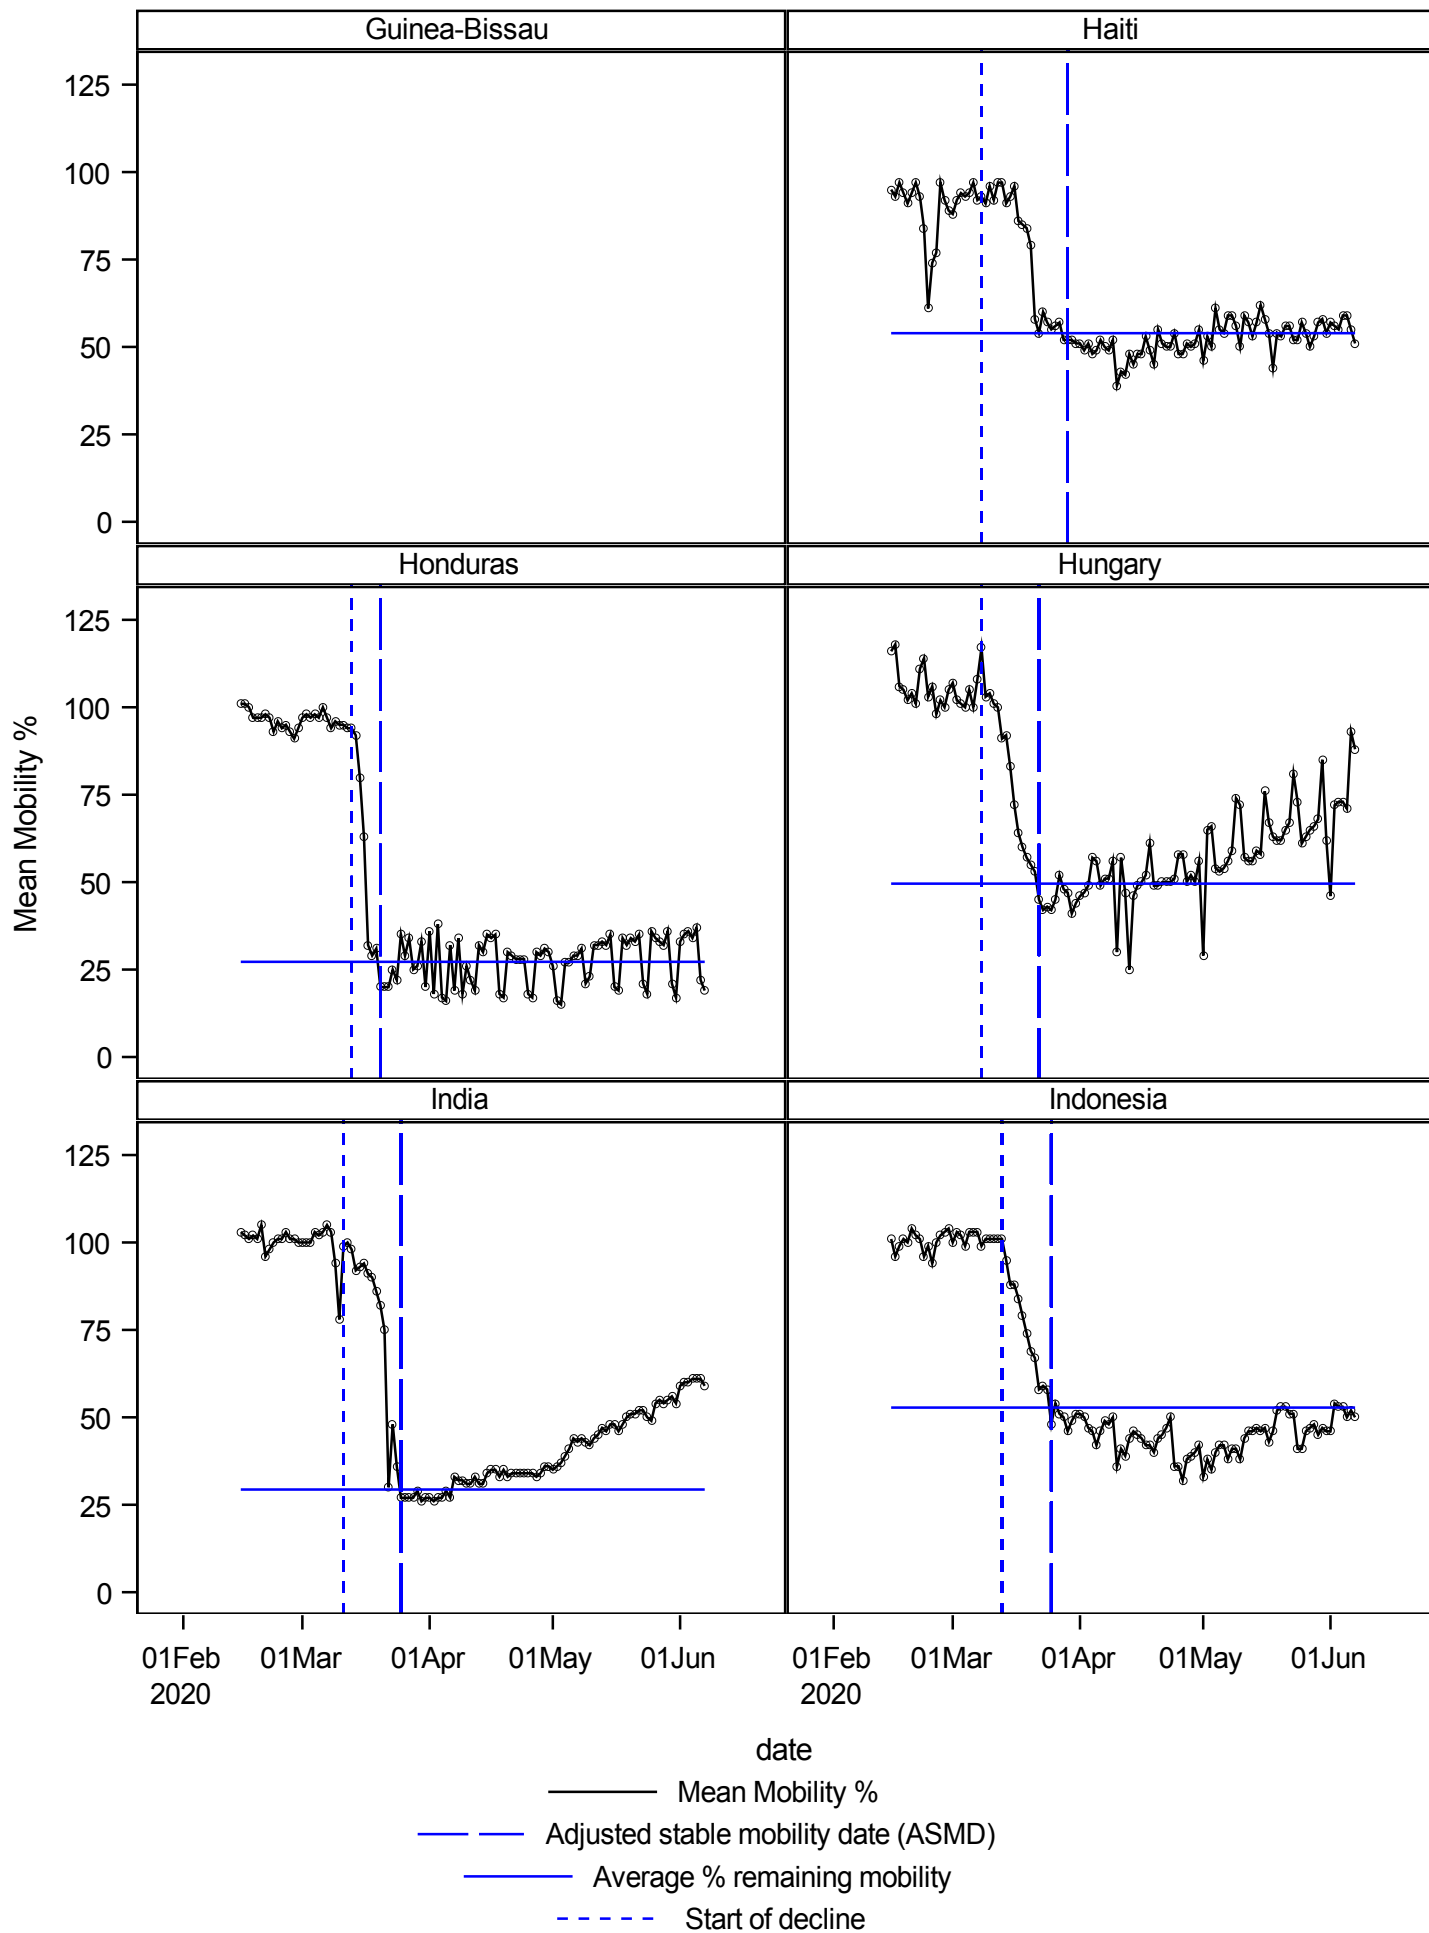

Supplementary Figures 3 Google TS mobility profiles per country

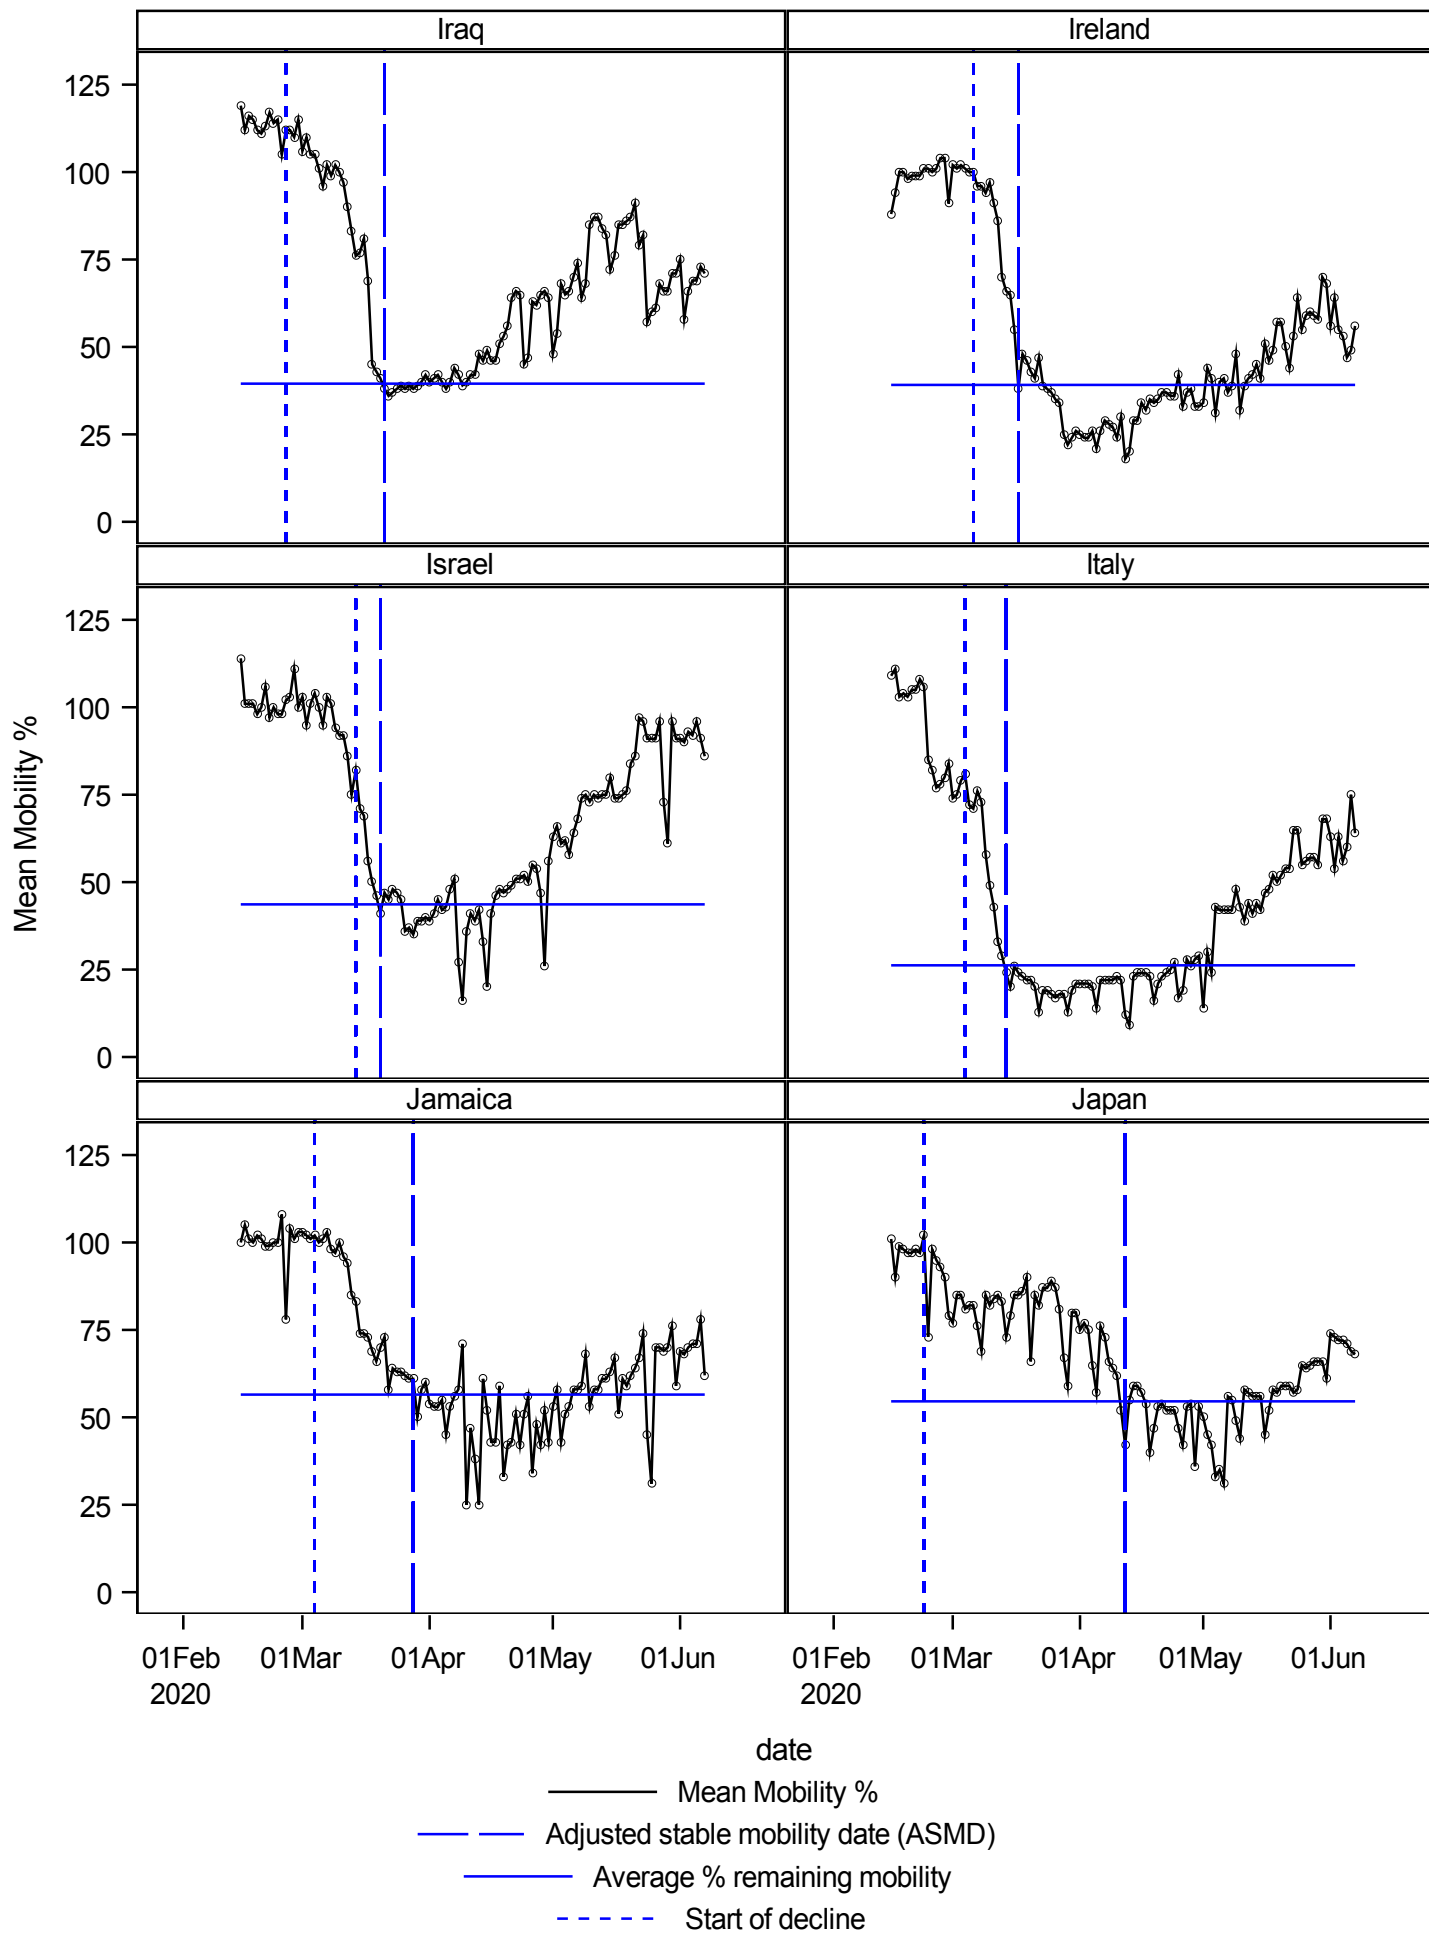



Supplementary Figures 3 Google TS mobility profiles per country

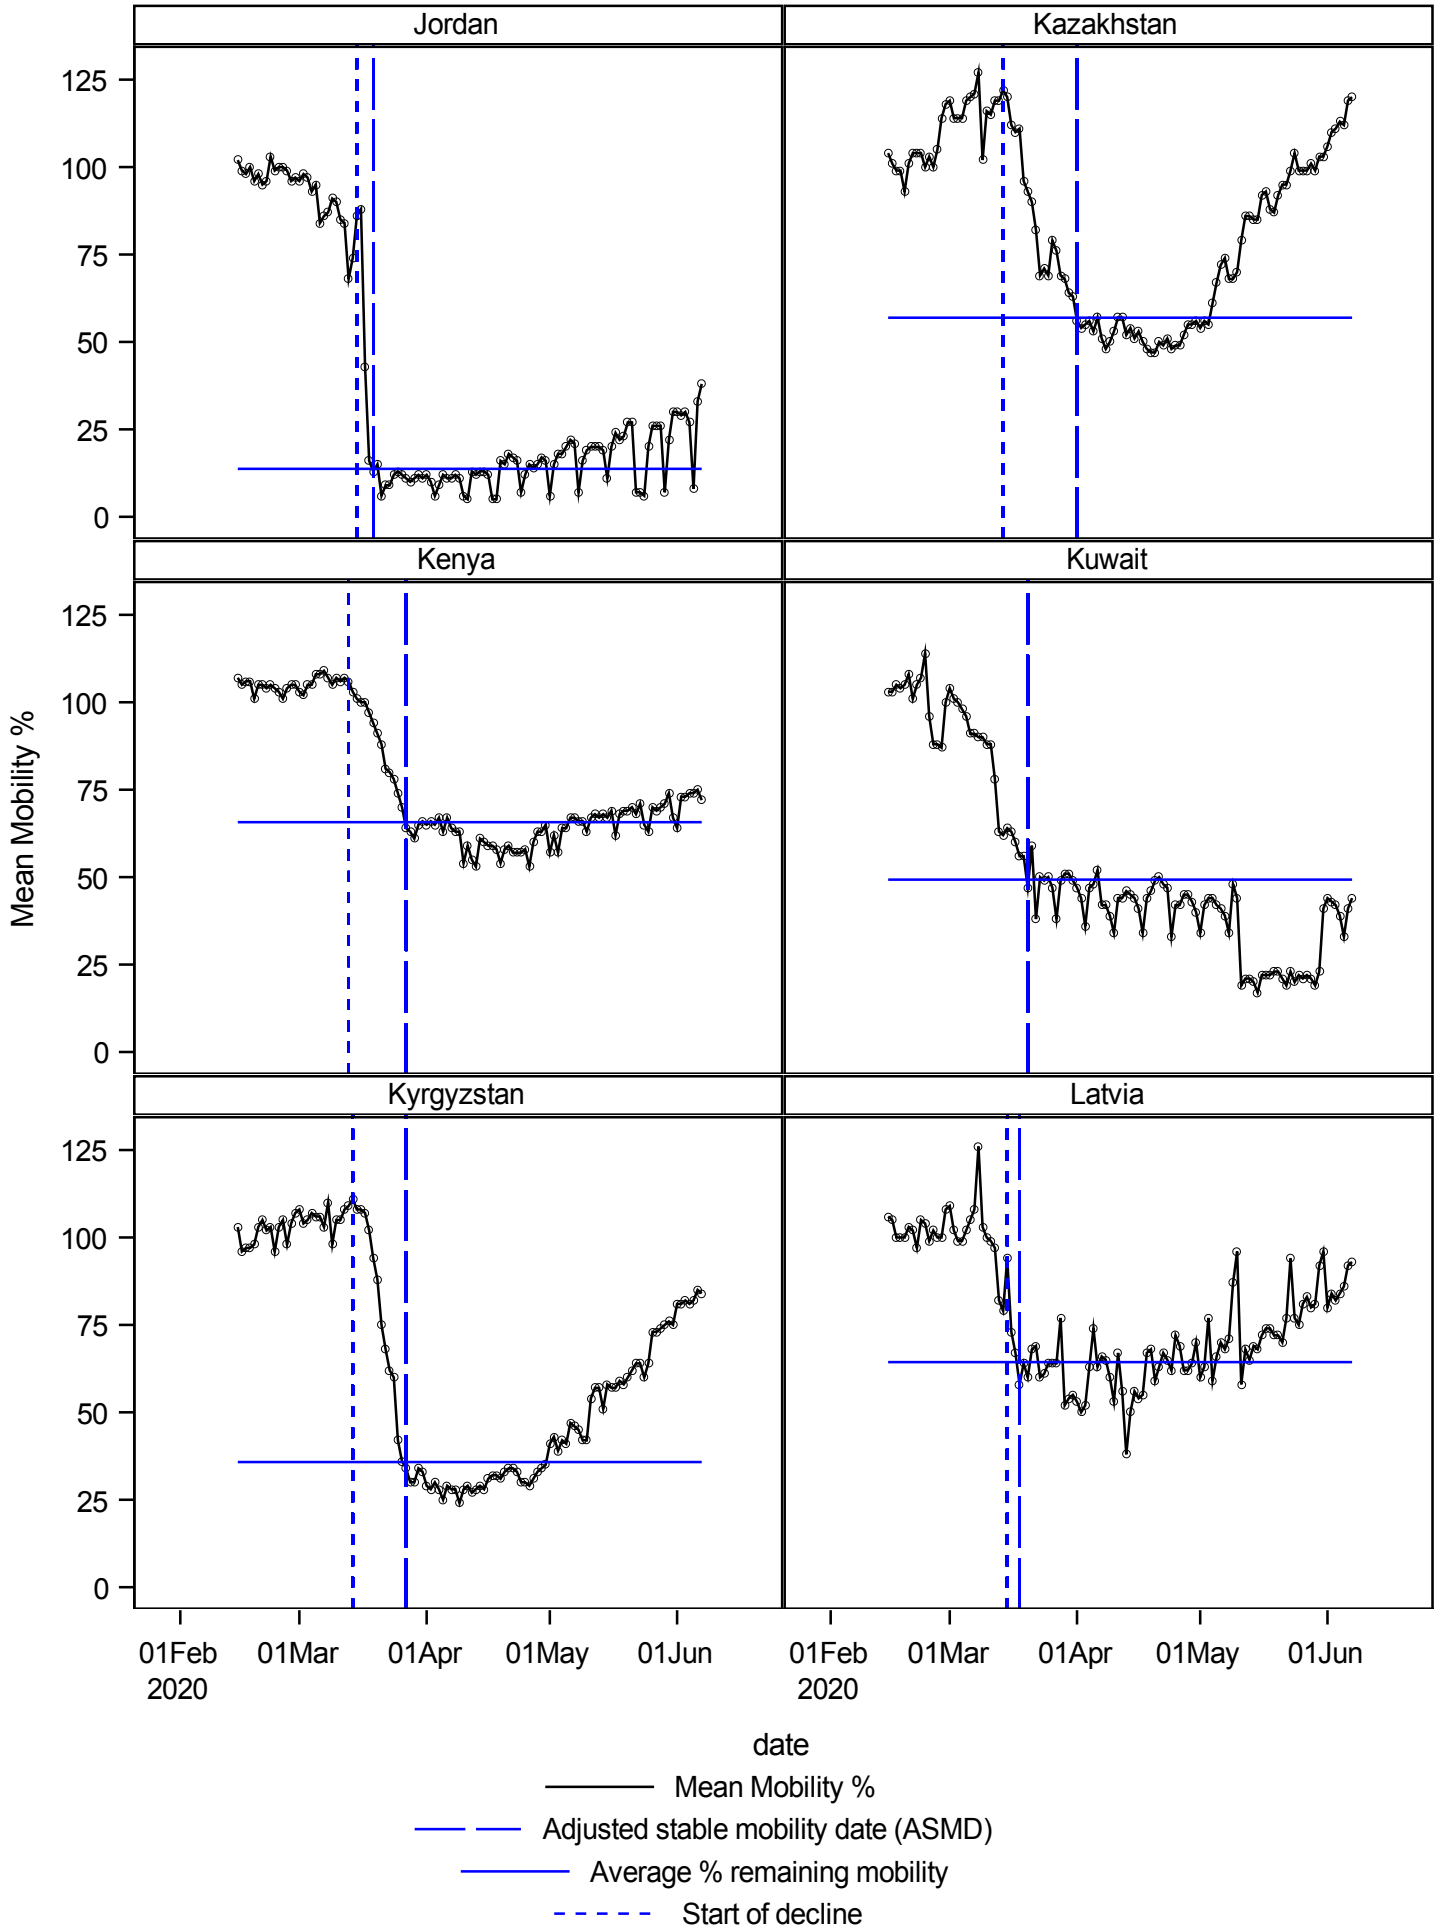

Supplementary Figures 3 Google TS mobility profiles per country

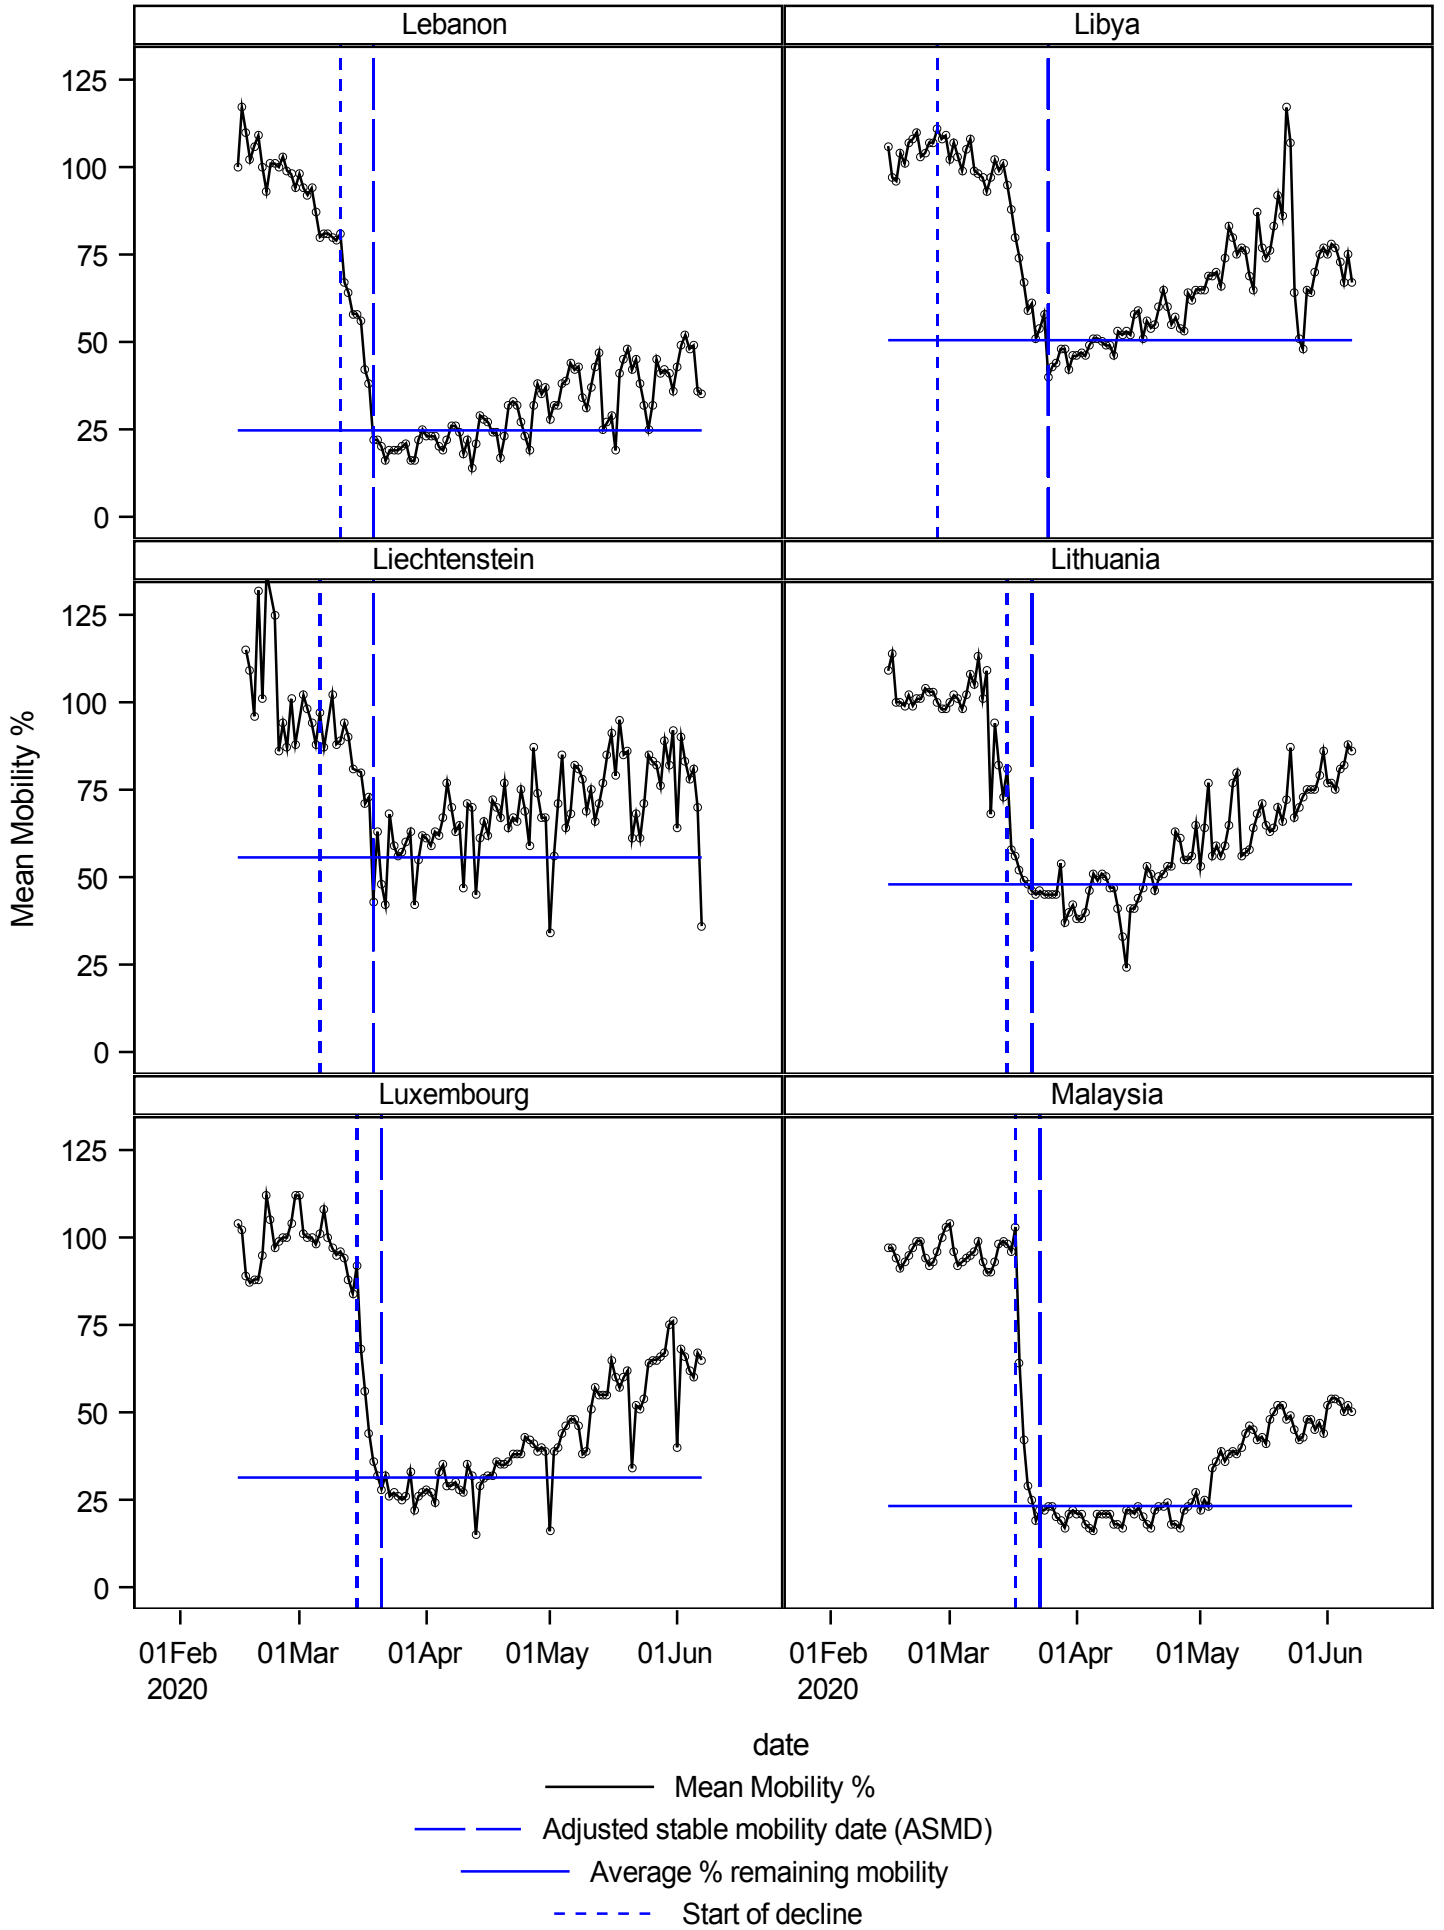

Supplementary Figures 3 Google TS mobility profiles per country

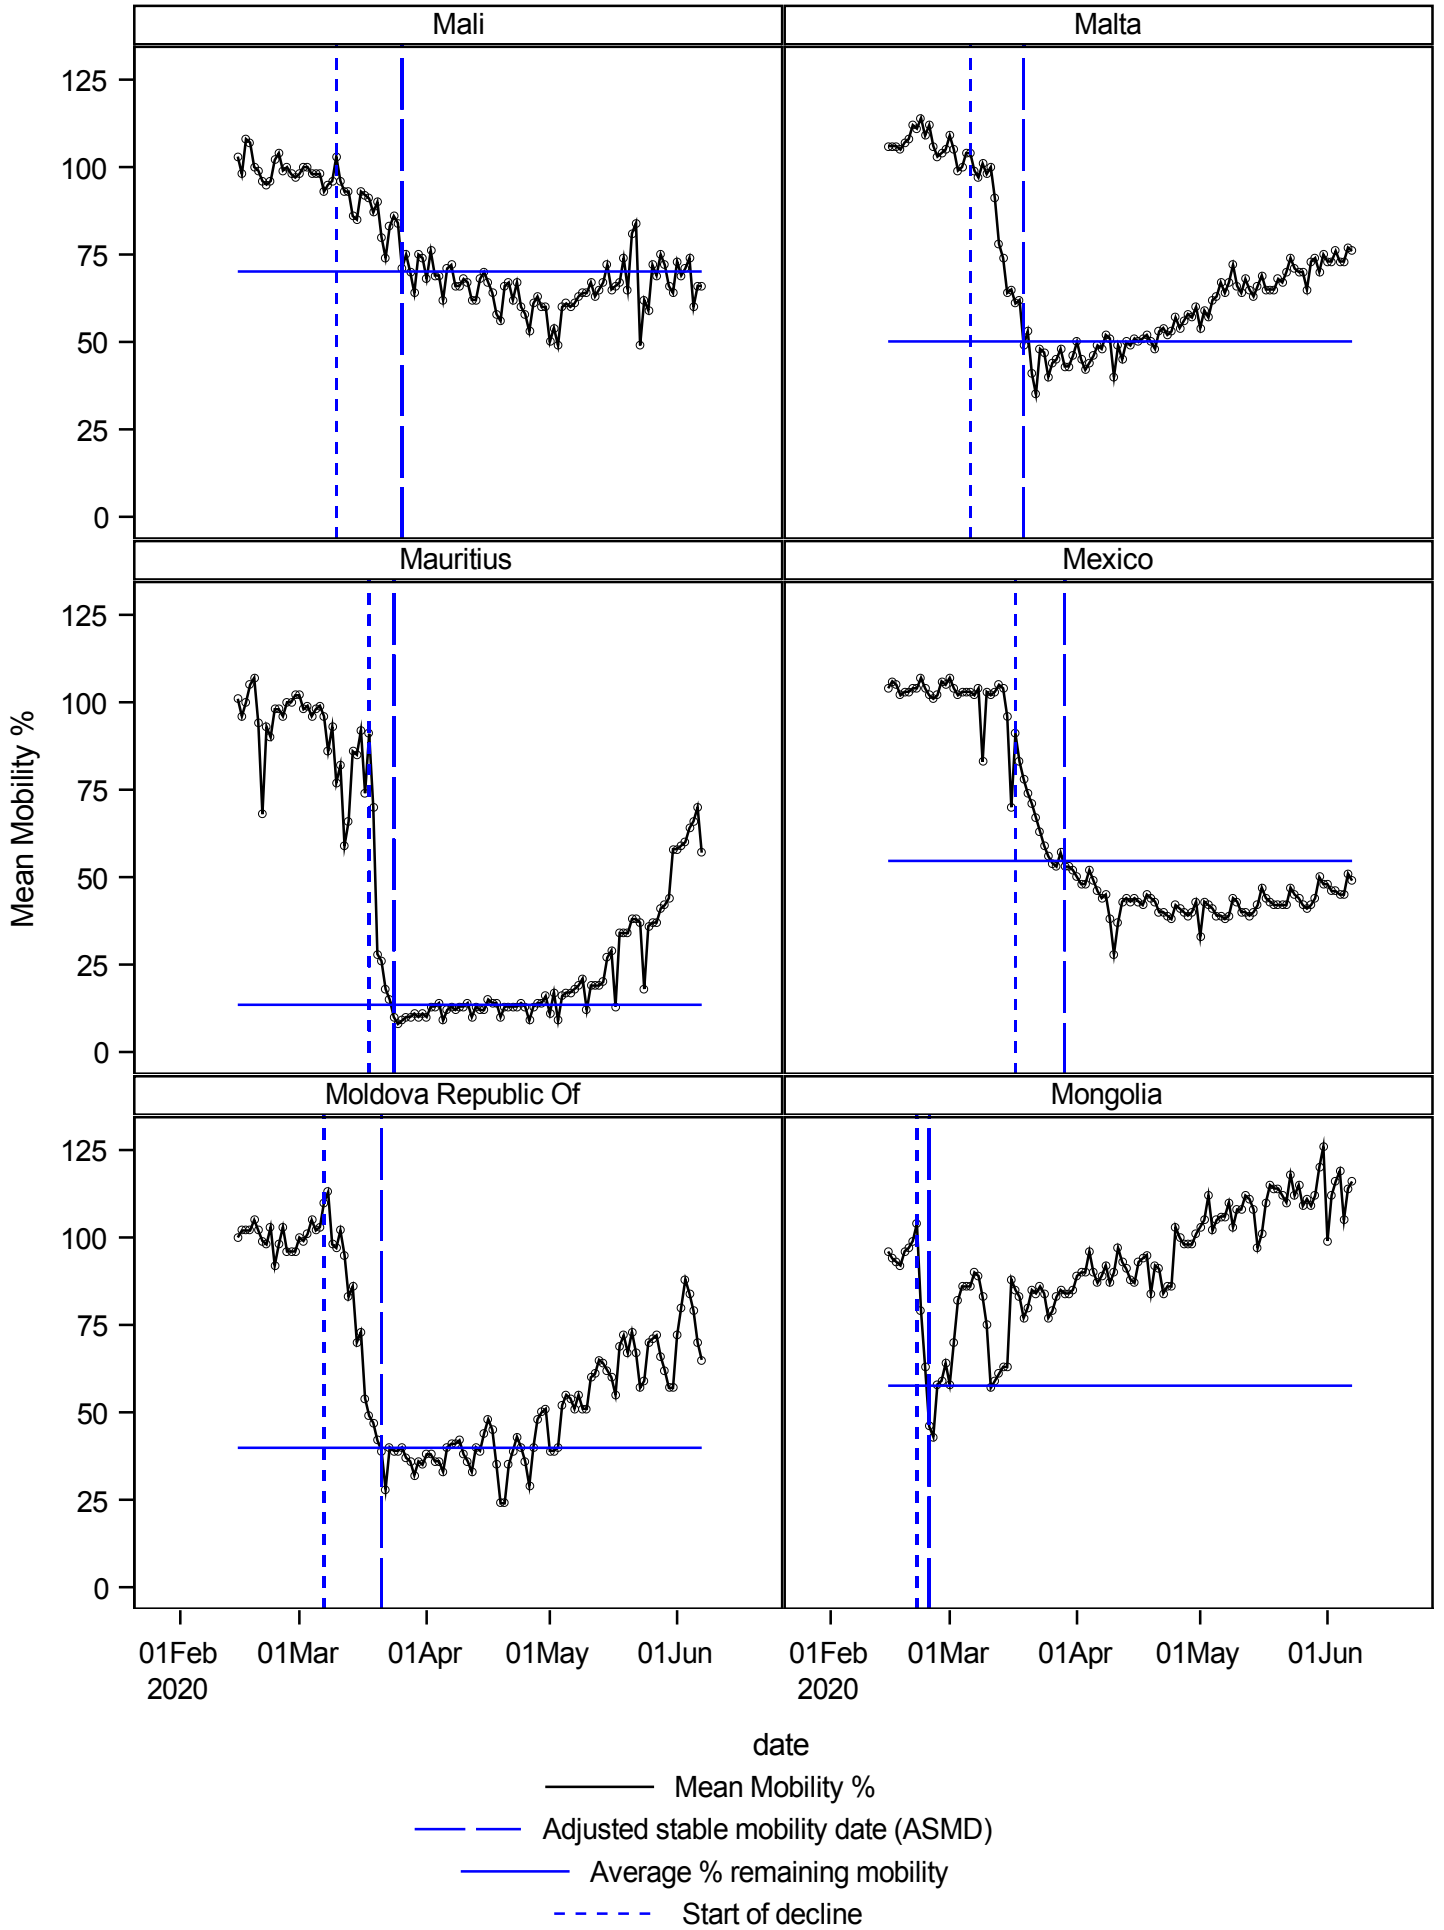

Supplementary Figures 3 Google TS mobility profiles per country

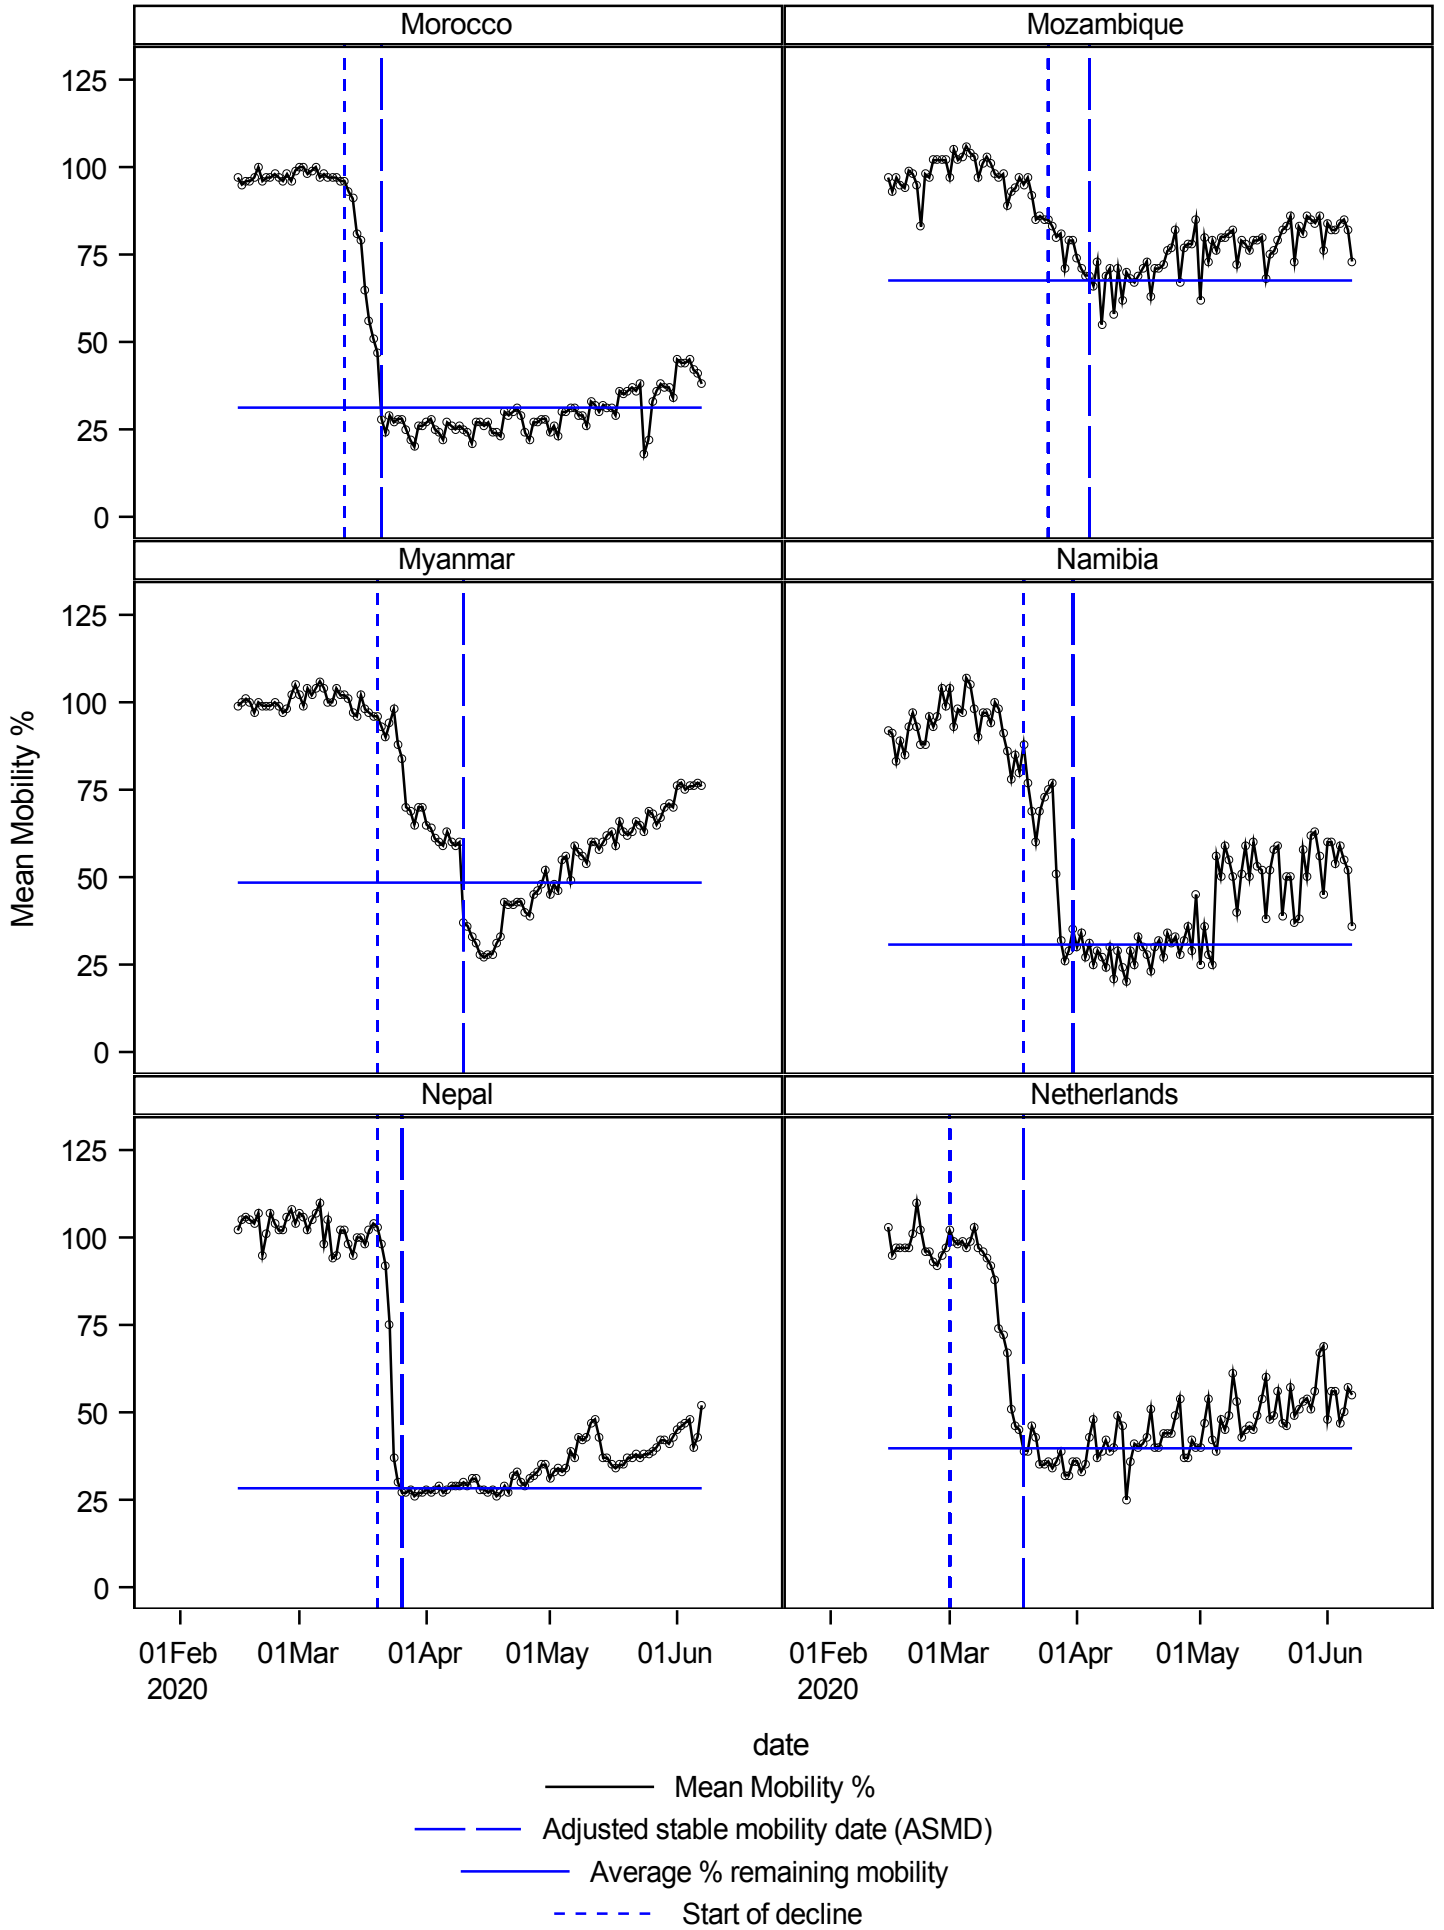

Supplementary Figures 3 Google TS mobility profiles per country

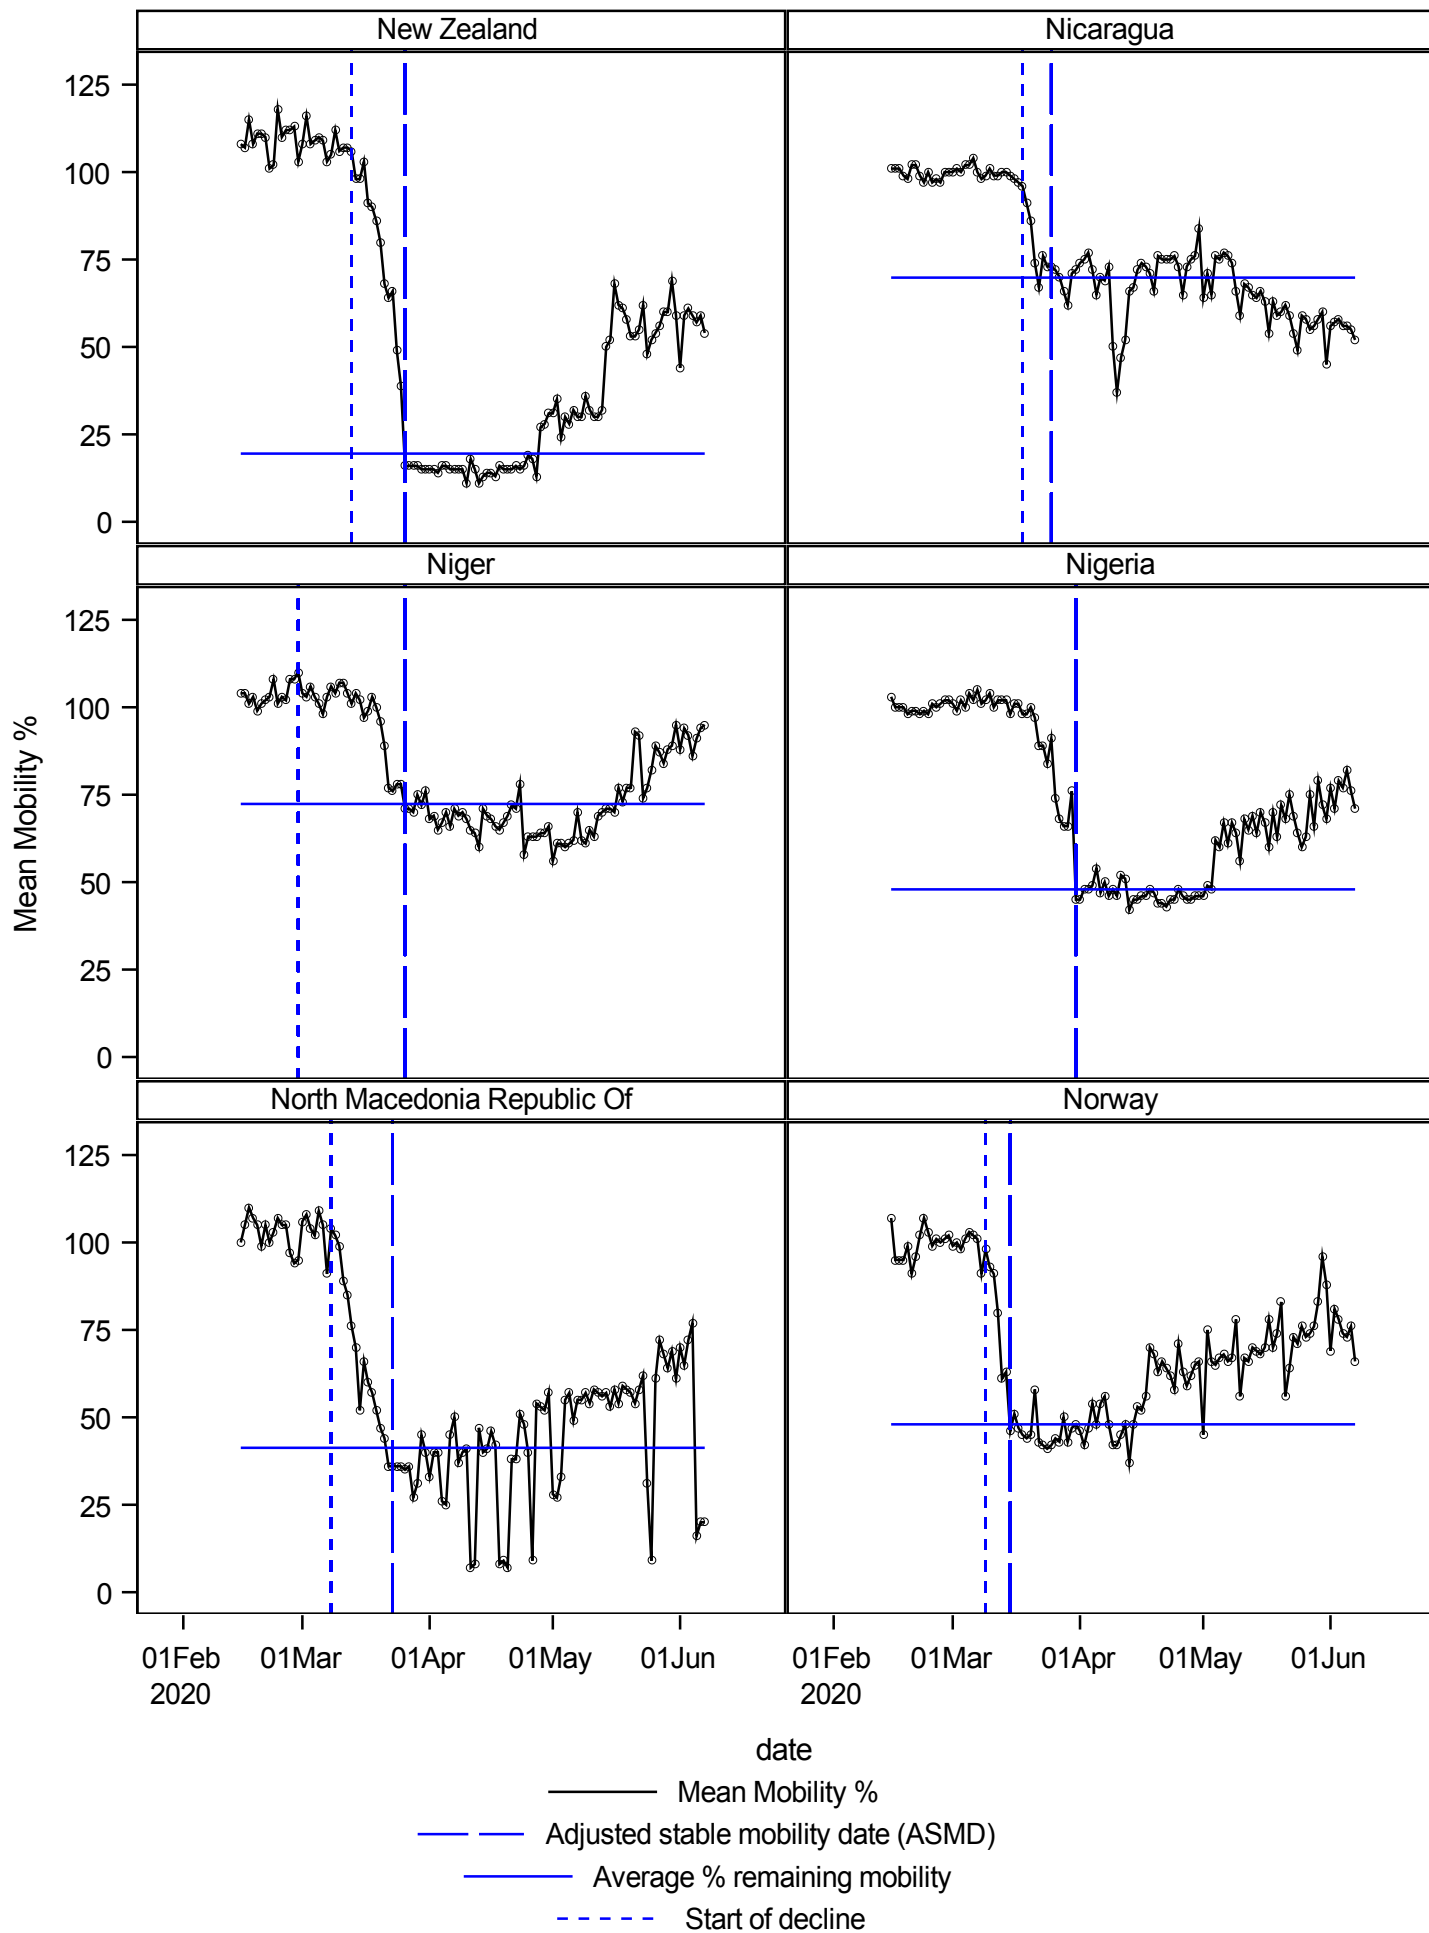

Supplementary Figures 3 Google TS mobility profiles per country

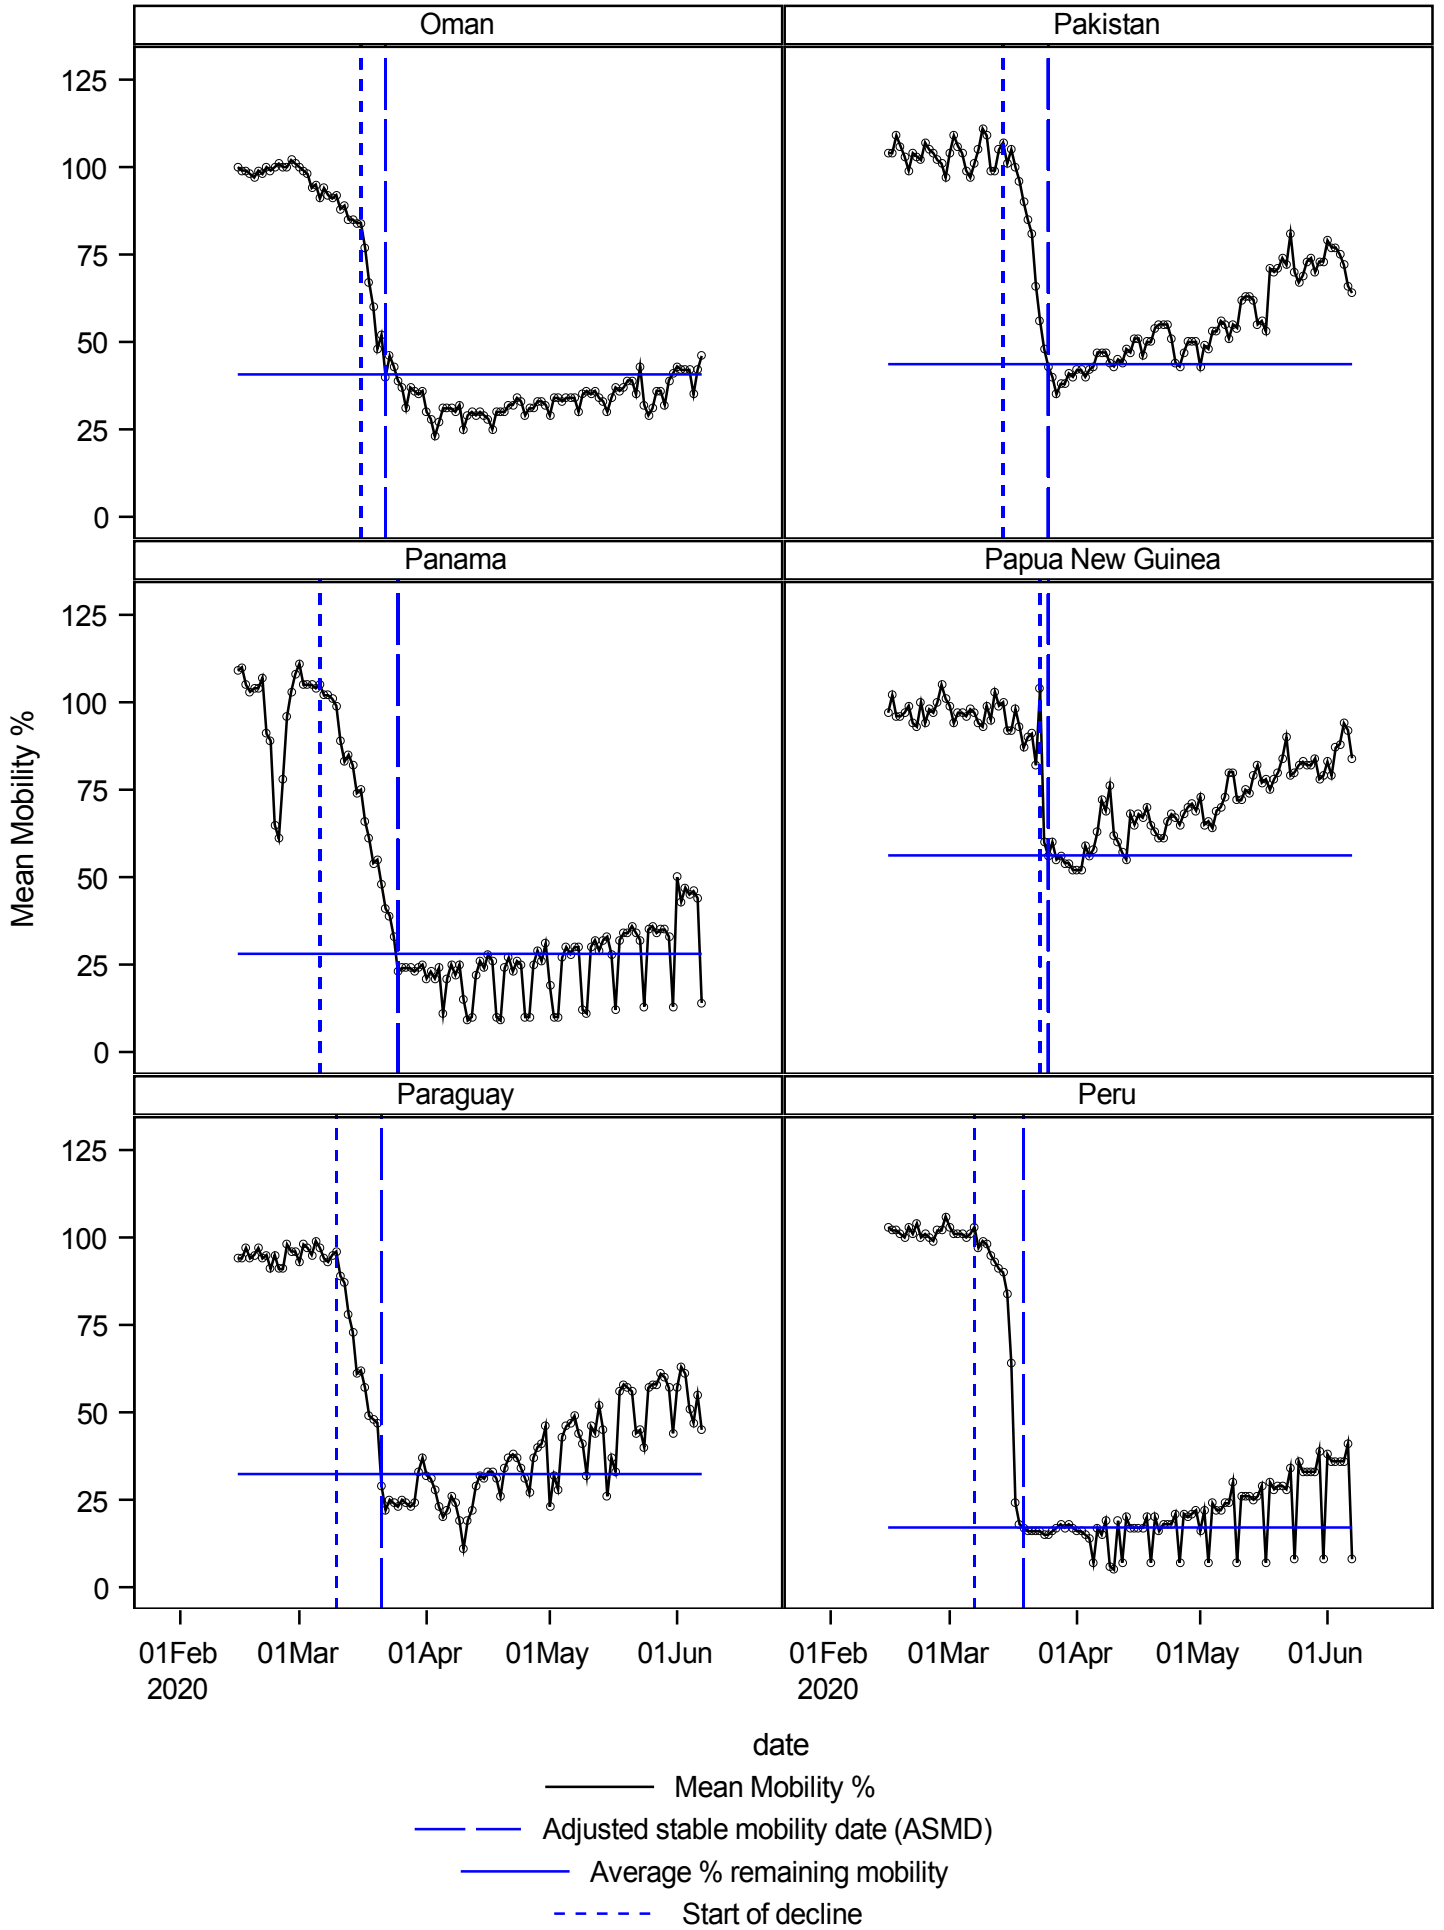

Supplementary Figures 3 Google TS mobility profiles per country

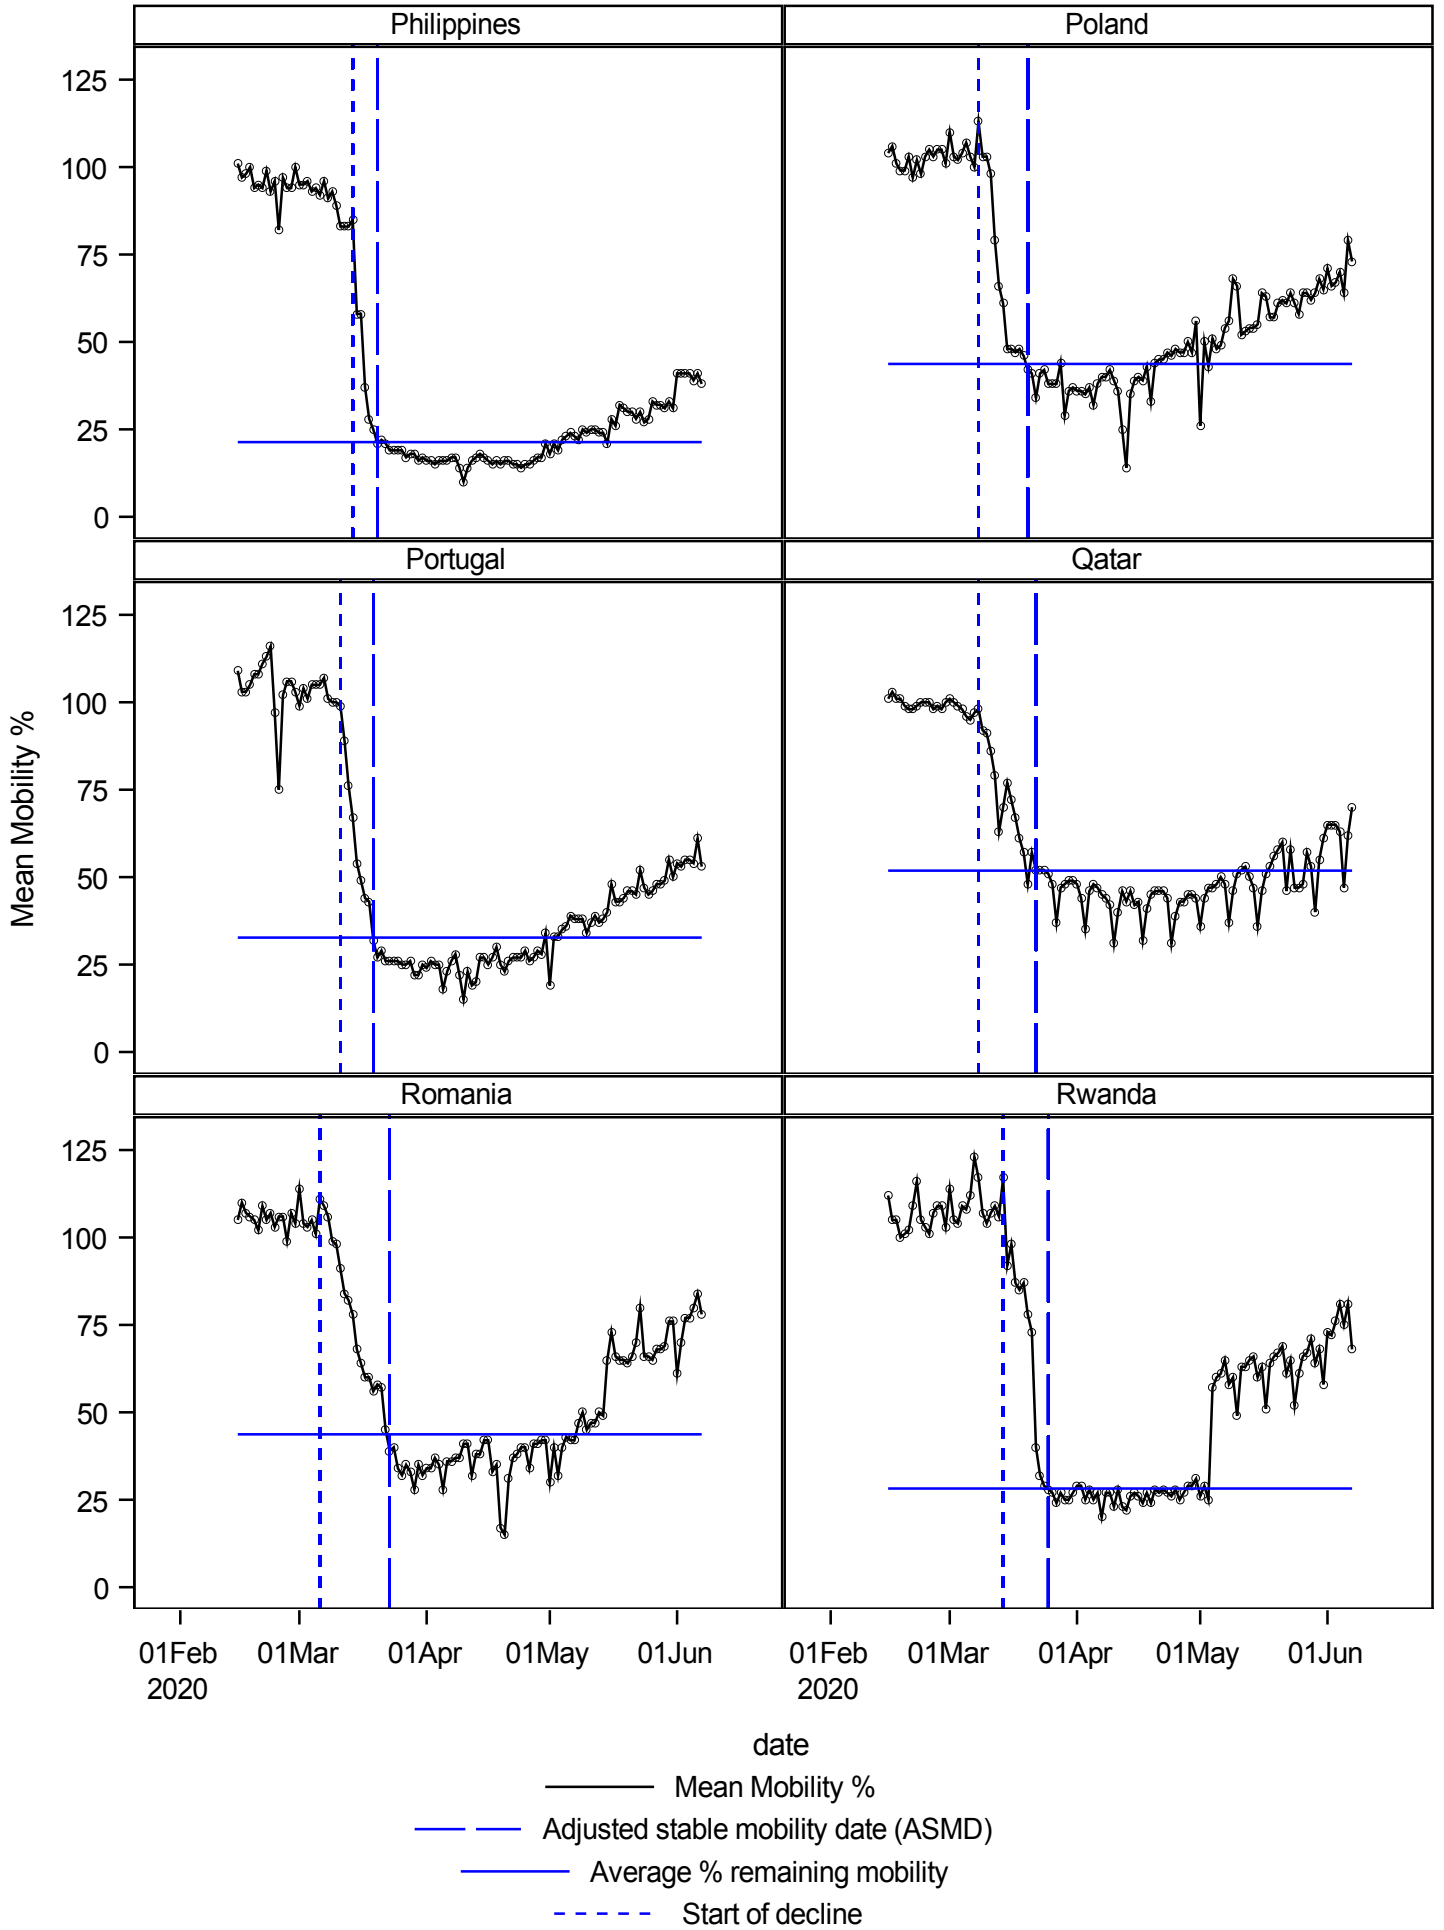

Supplementary Figures 3 Google TS mobility profiles per country

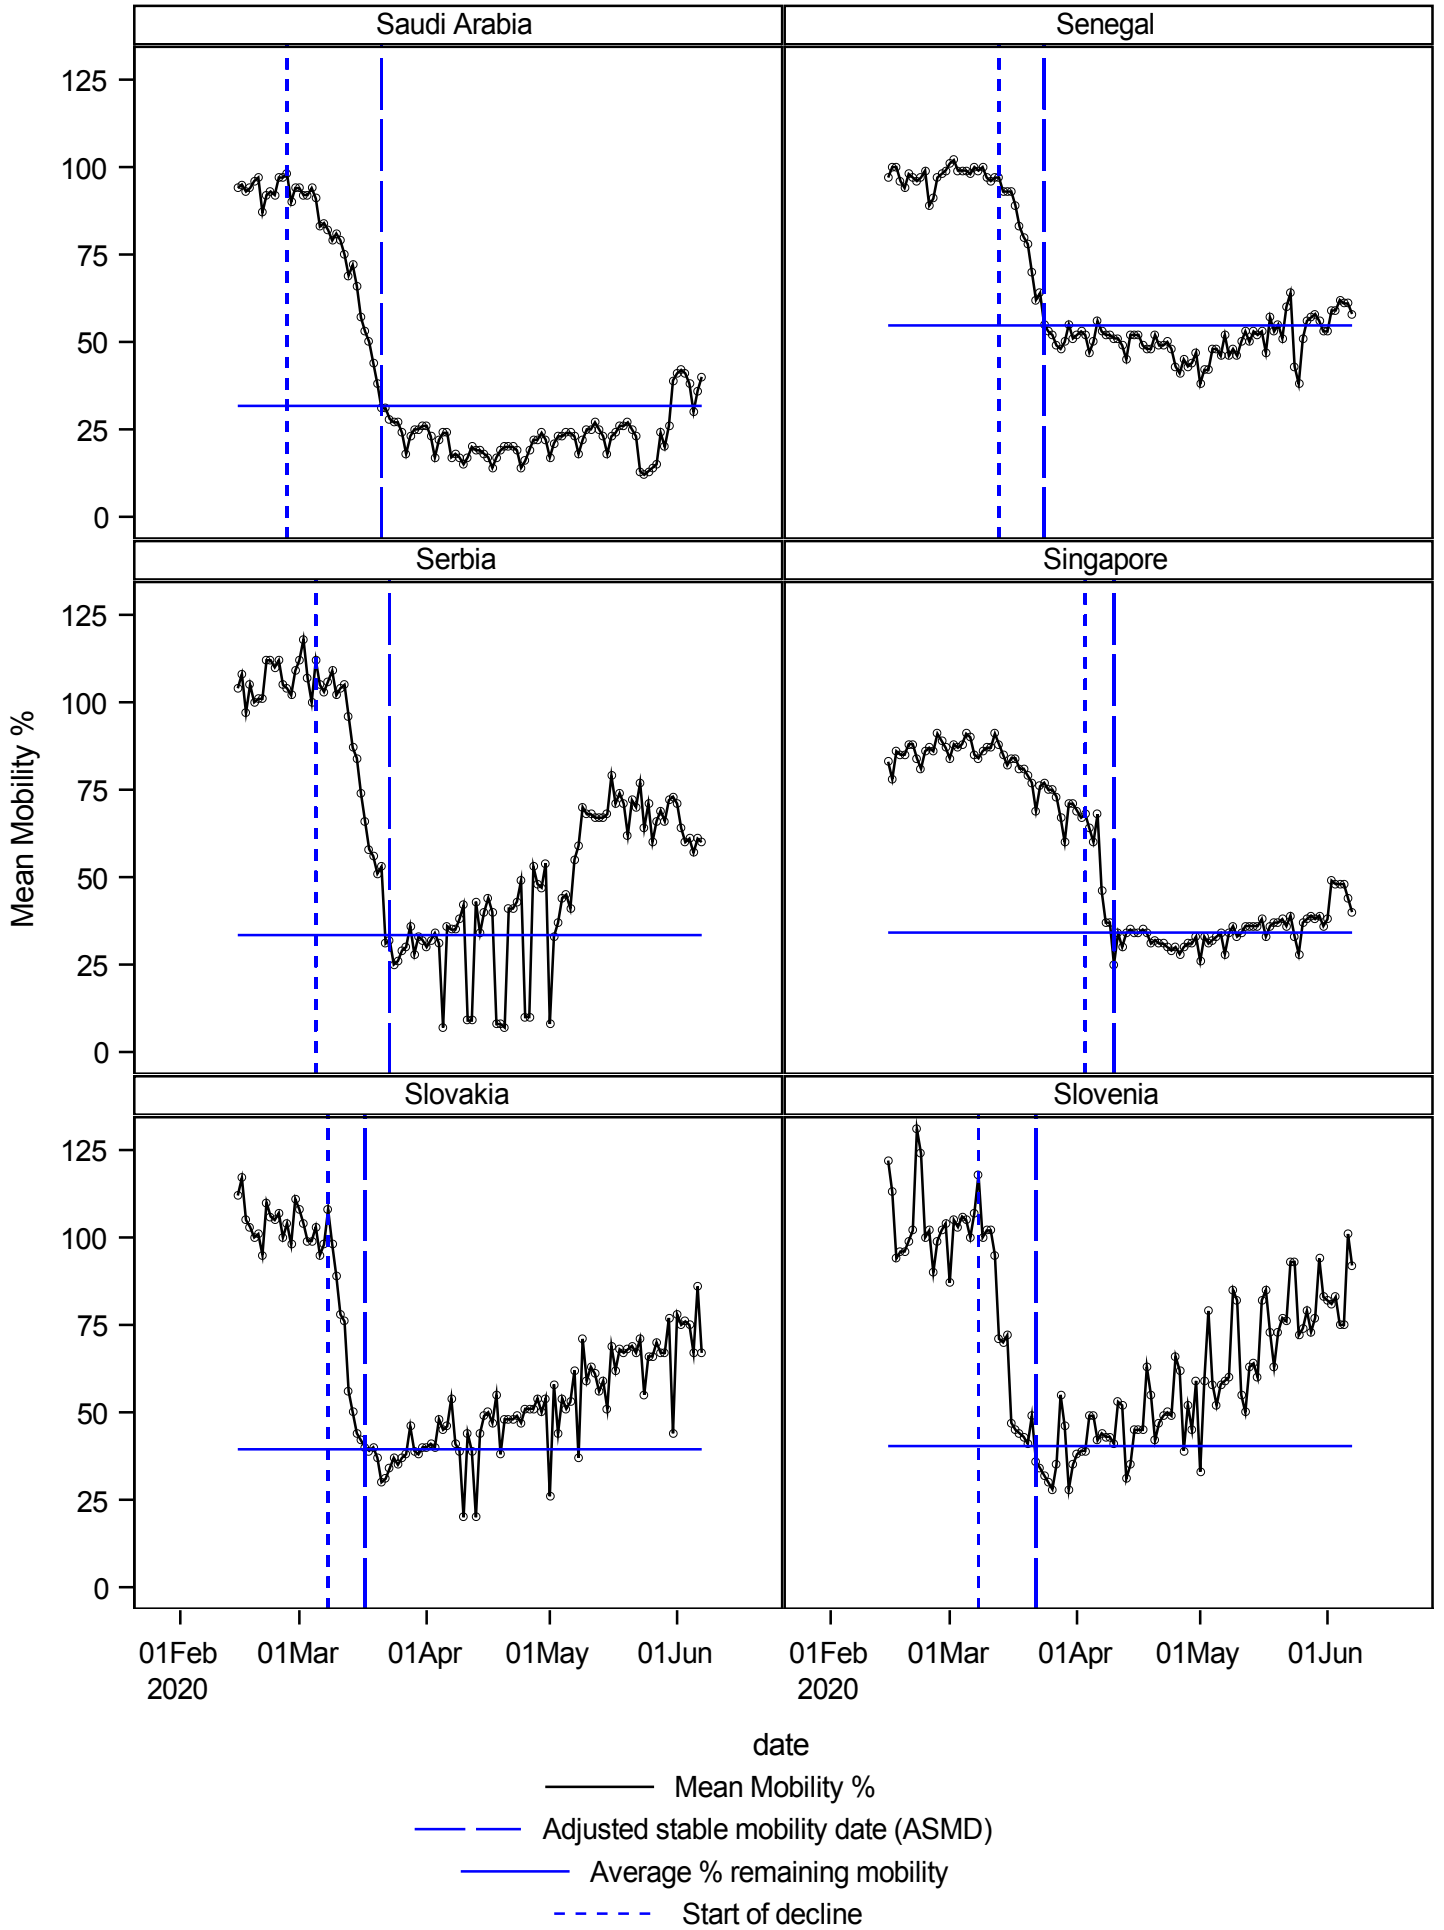



Supplementary Figures 3 Google TS mobility profiles per country

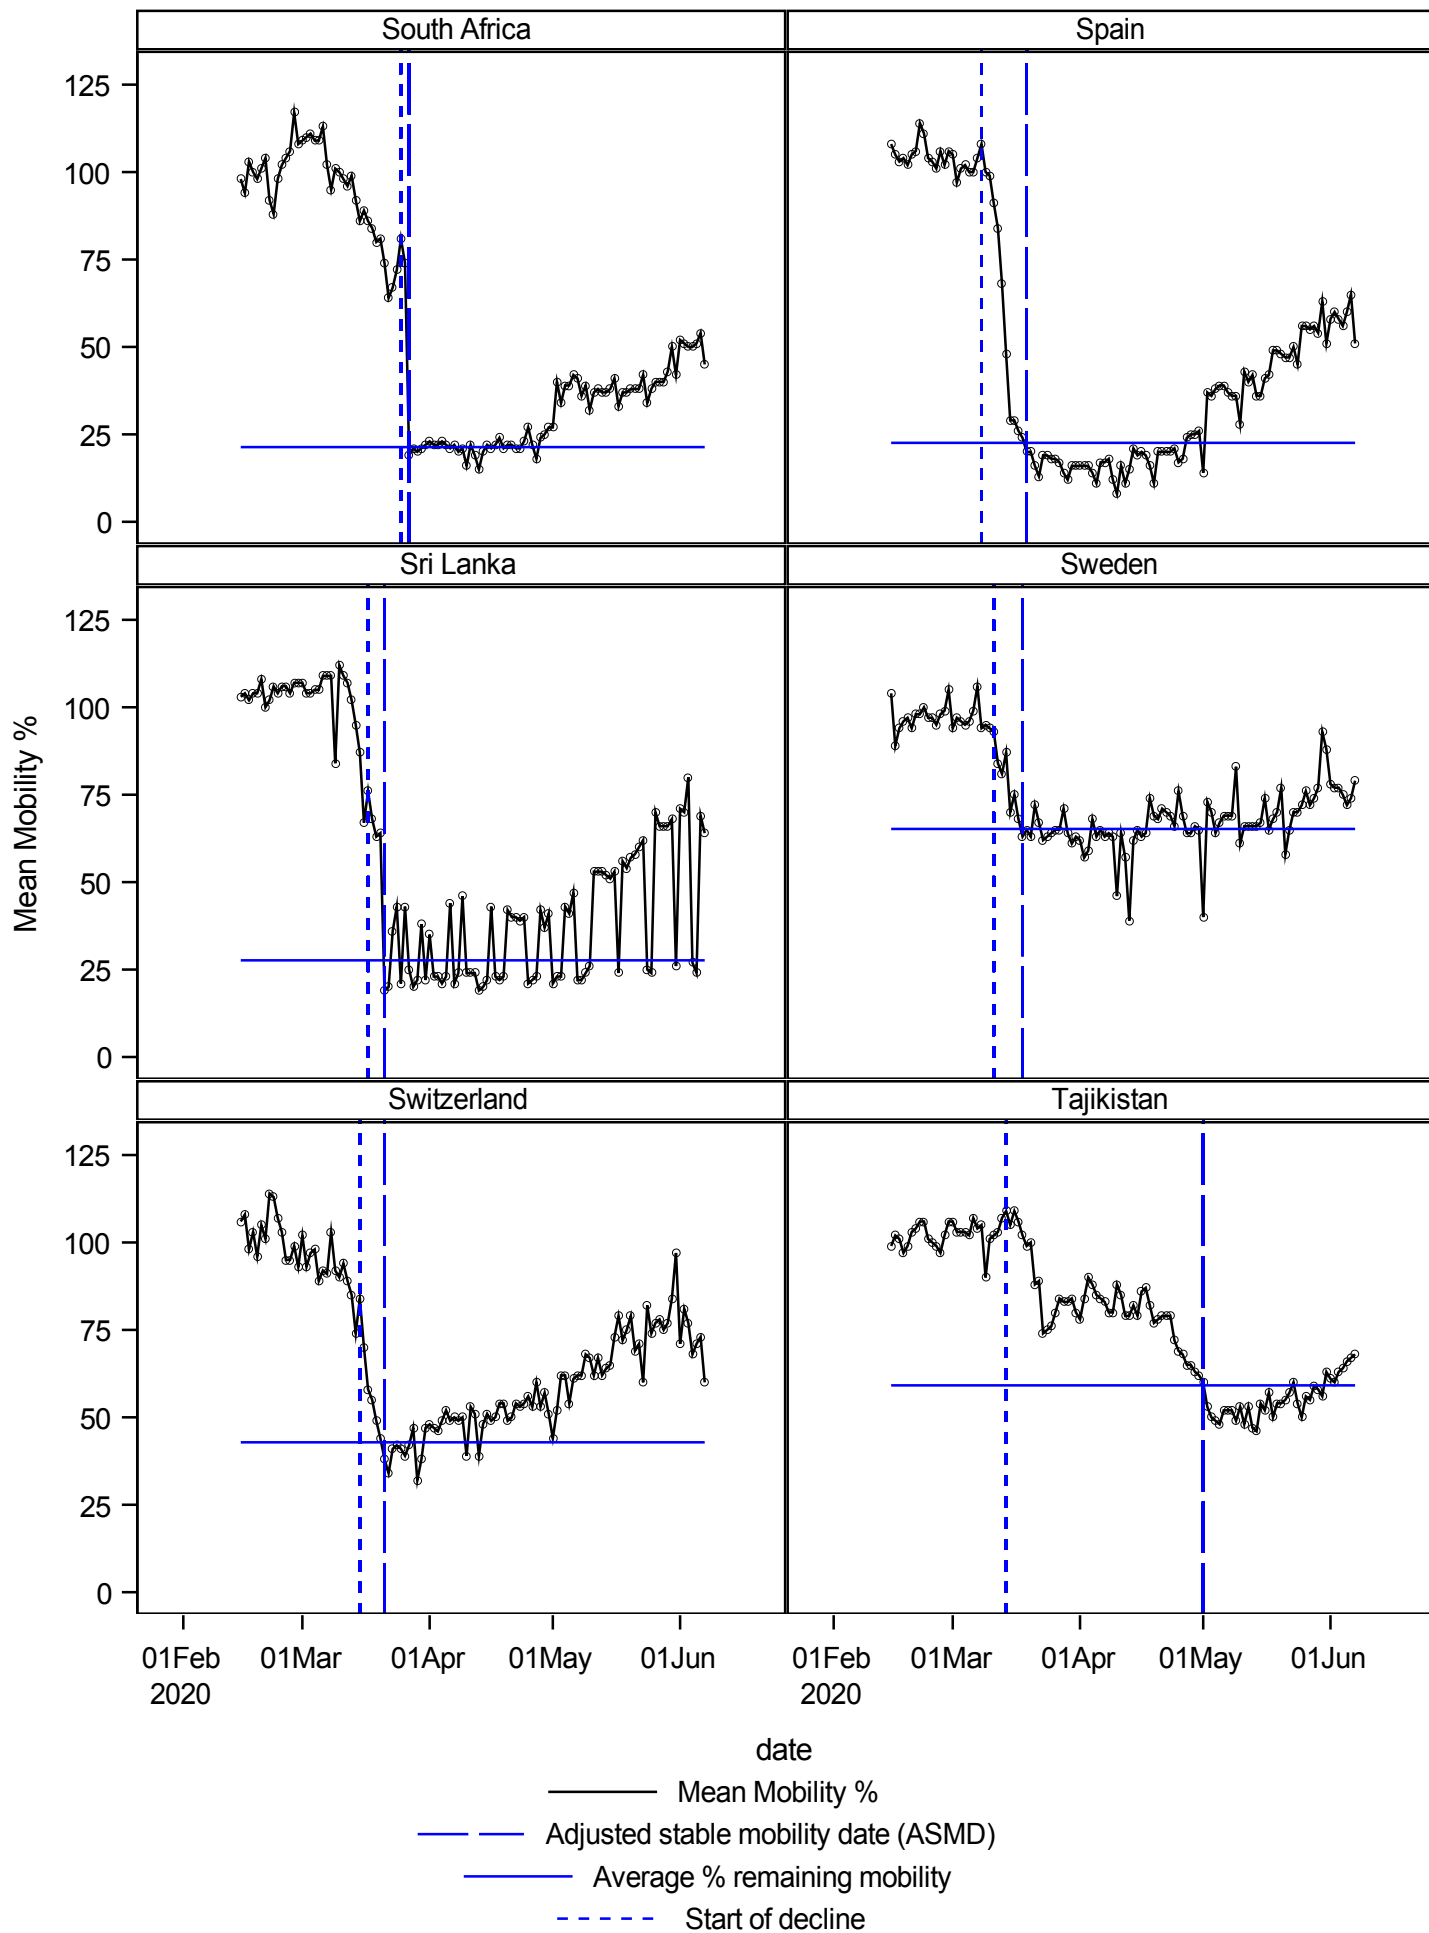

Supplementary Figures 3 Google TS mobility profiles per country

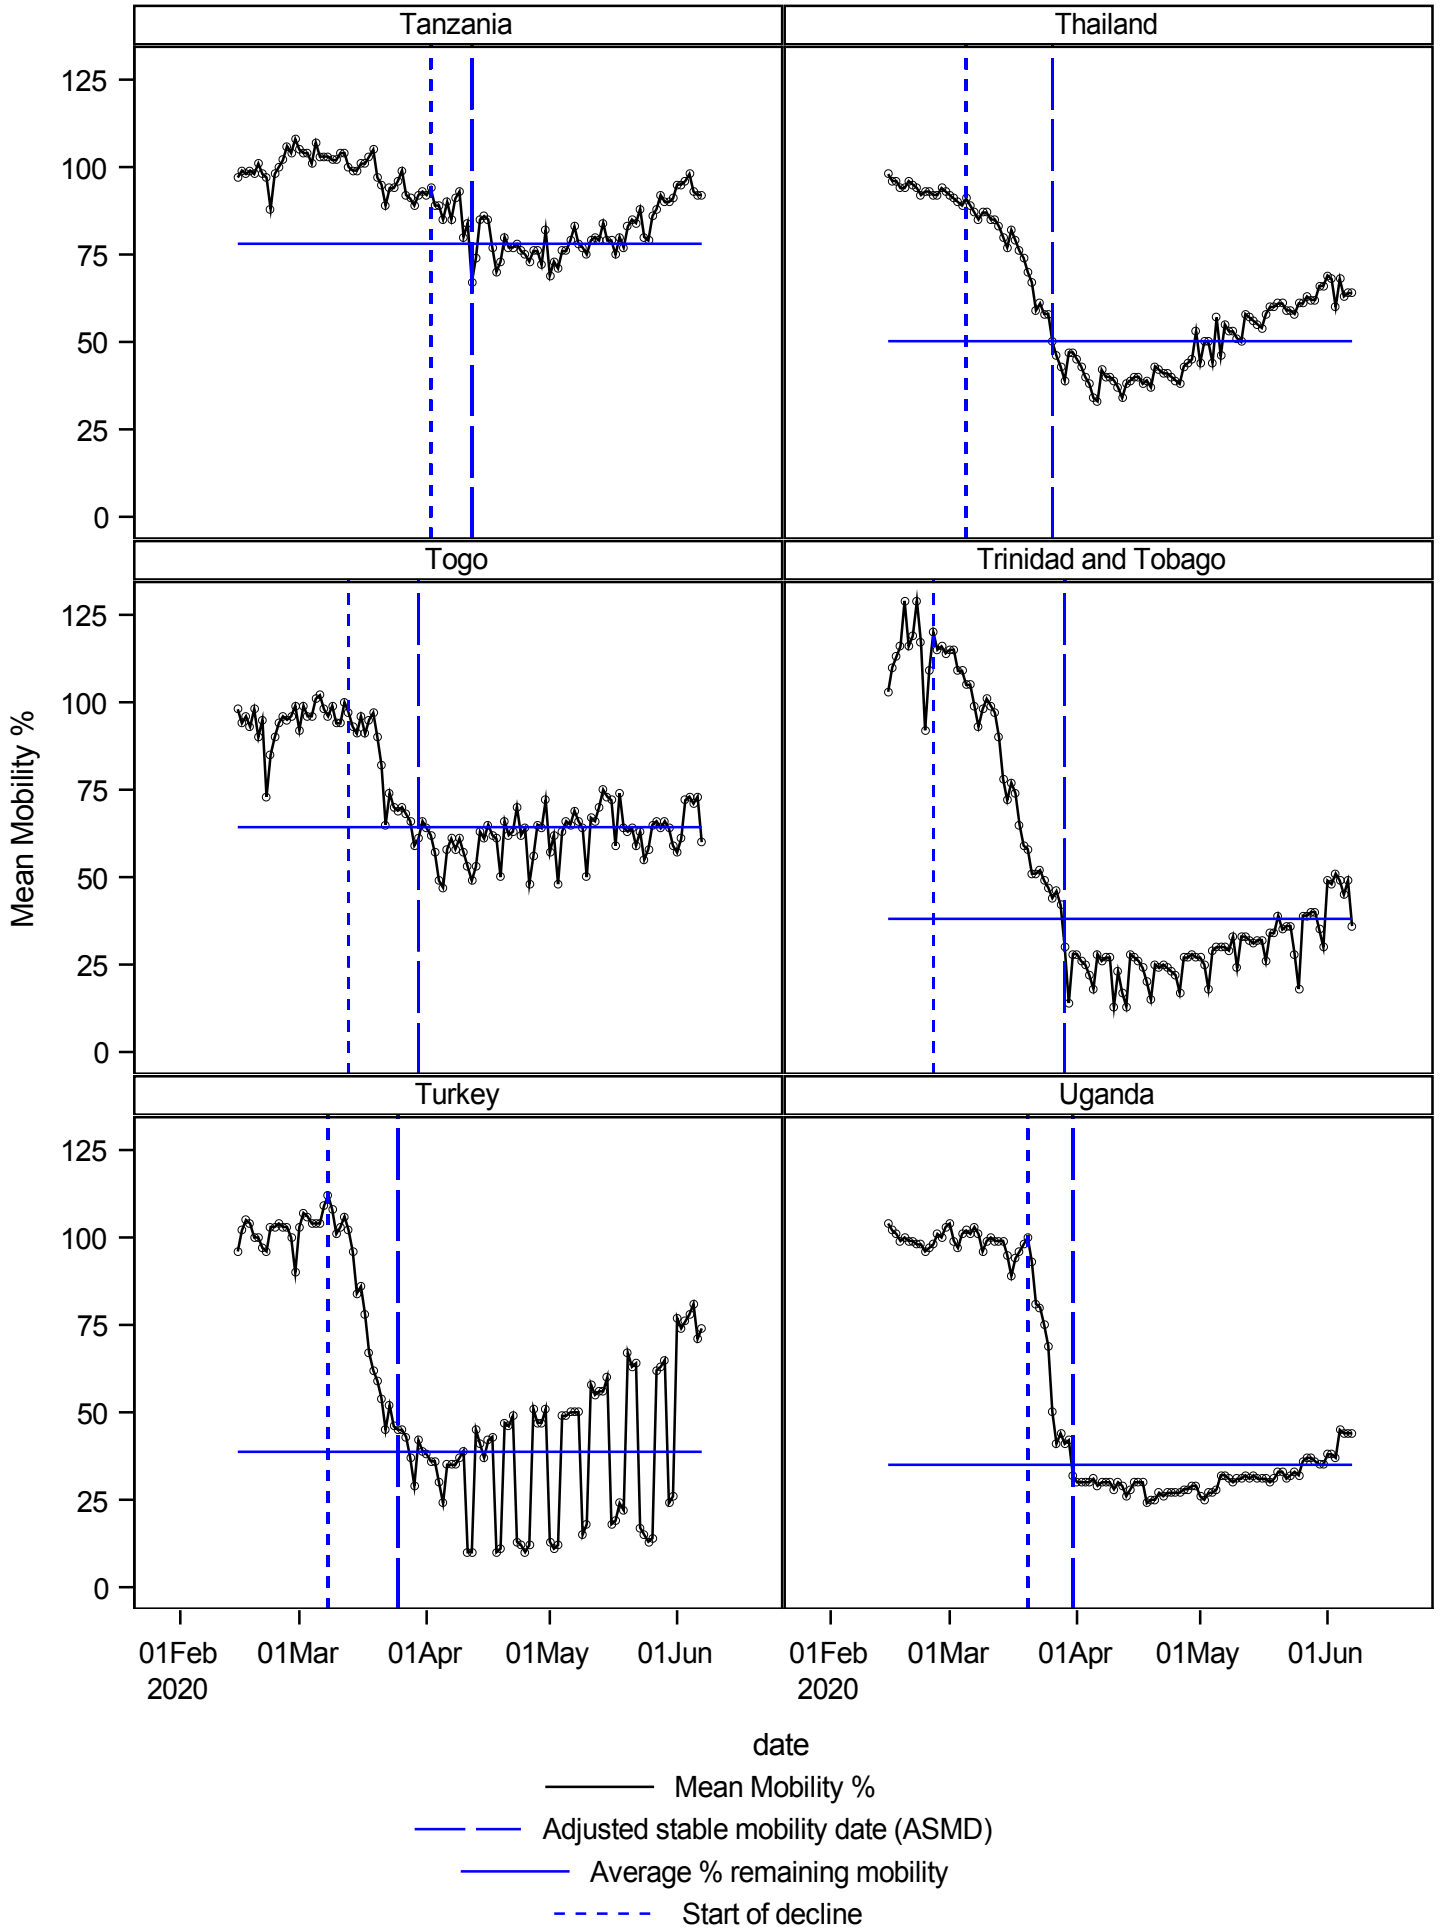

Supplementary Figures 3 Google TS mobility profiles per country

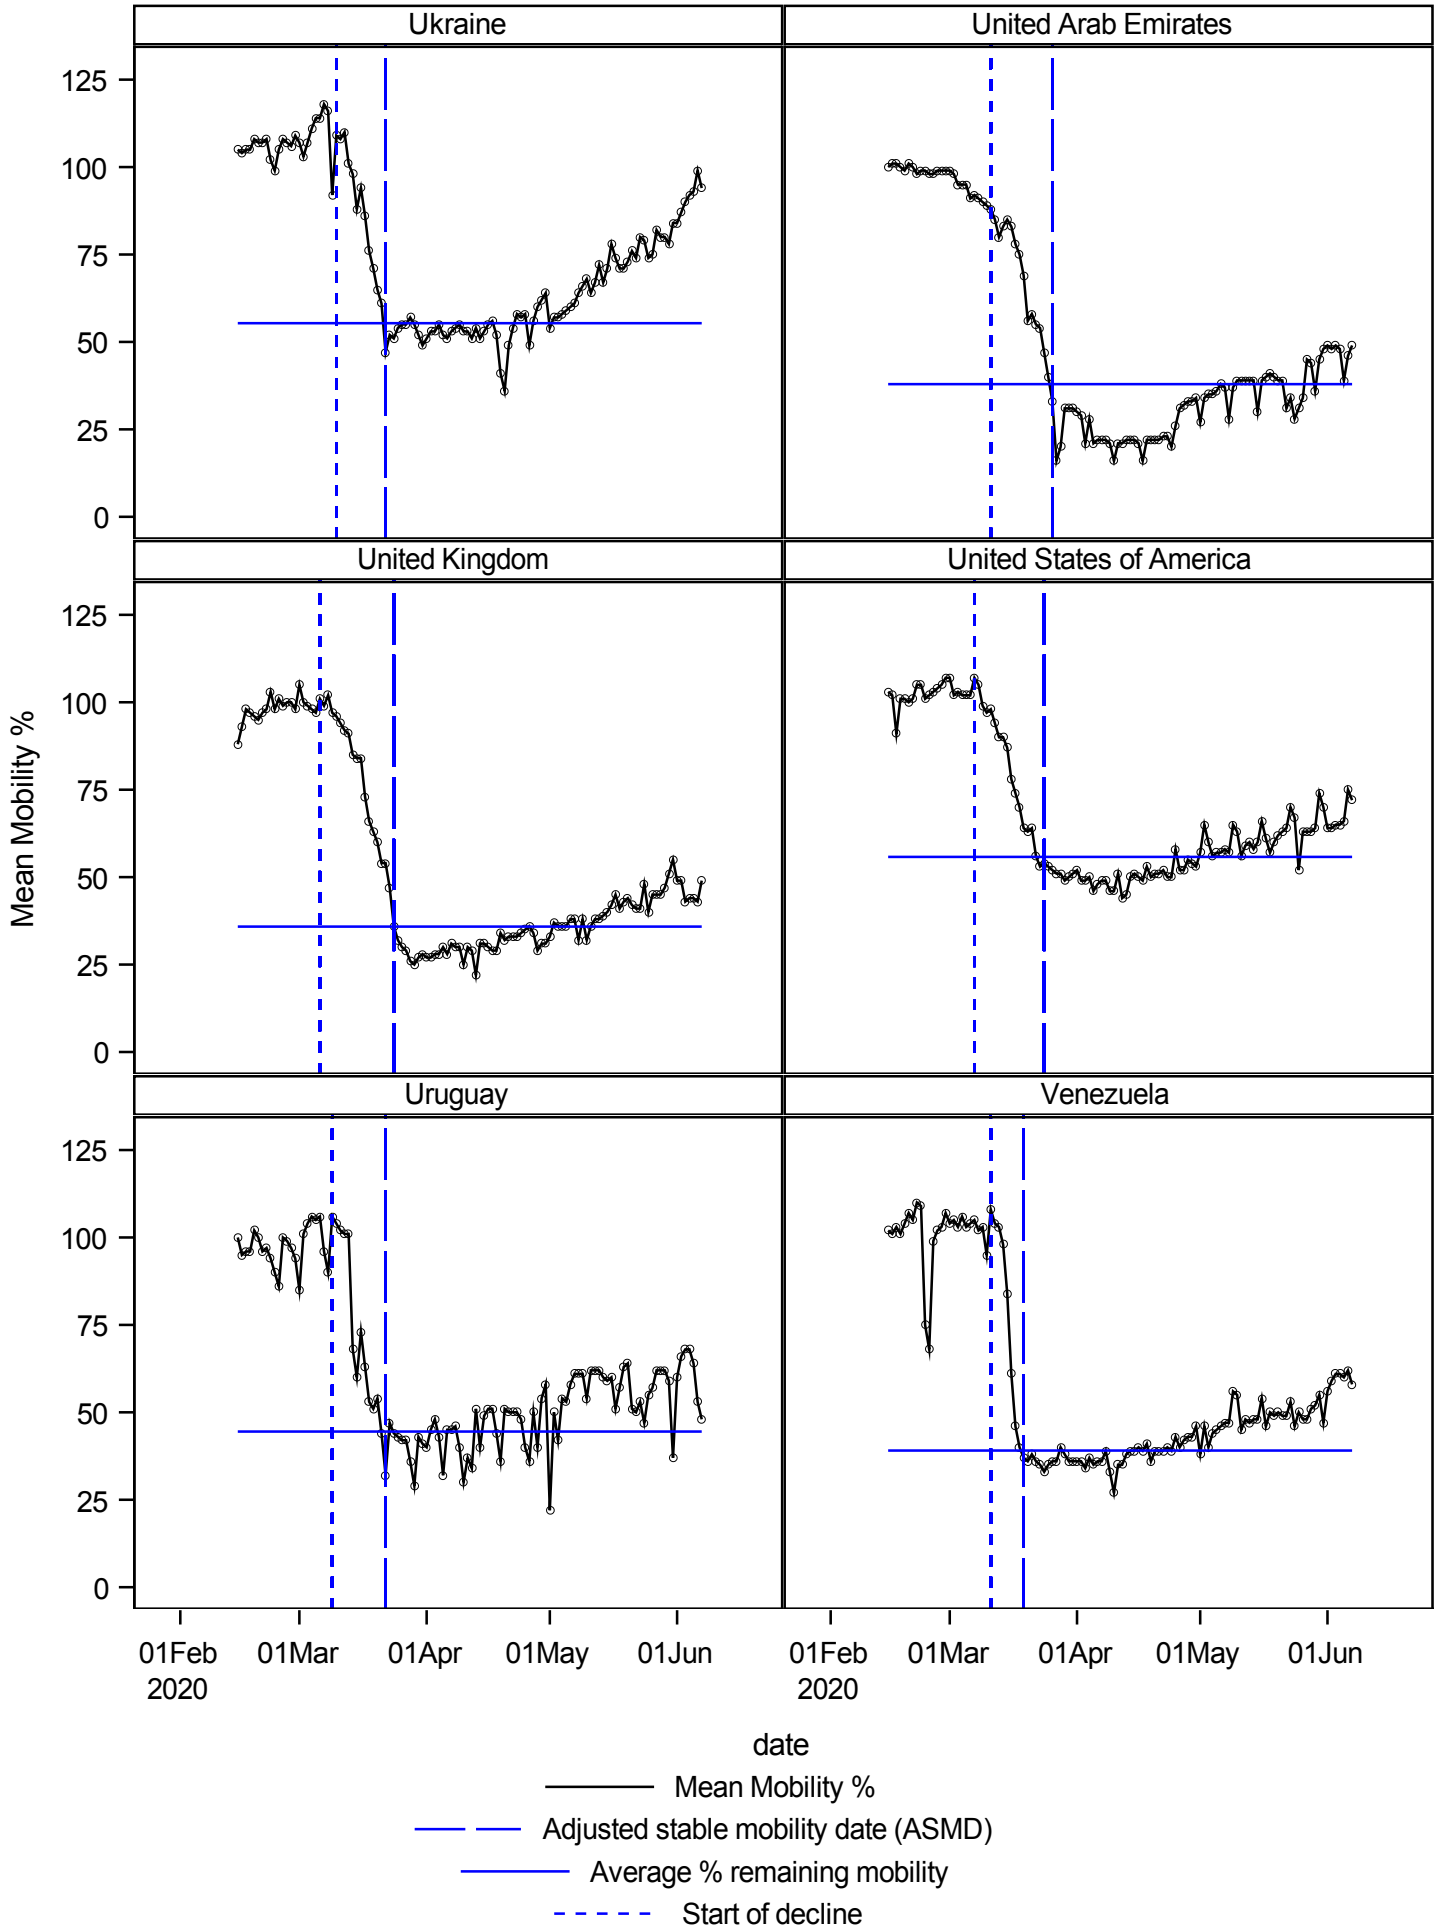

Supplementary Figures 3 Google TS mobility profiles per country

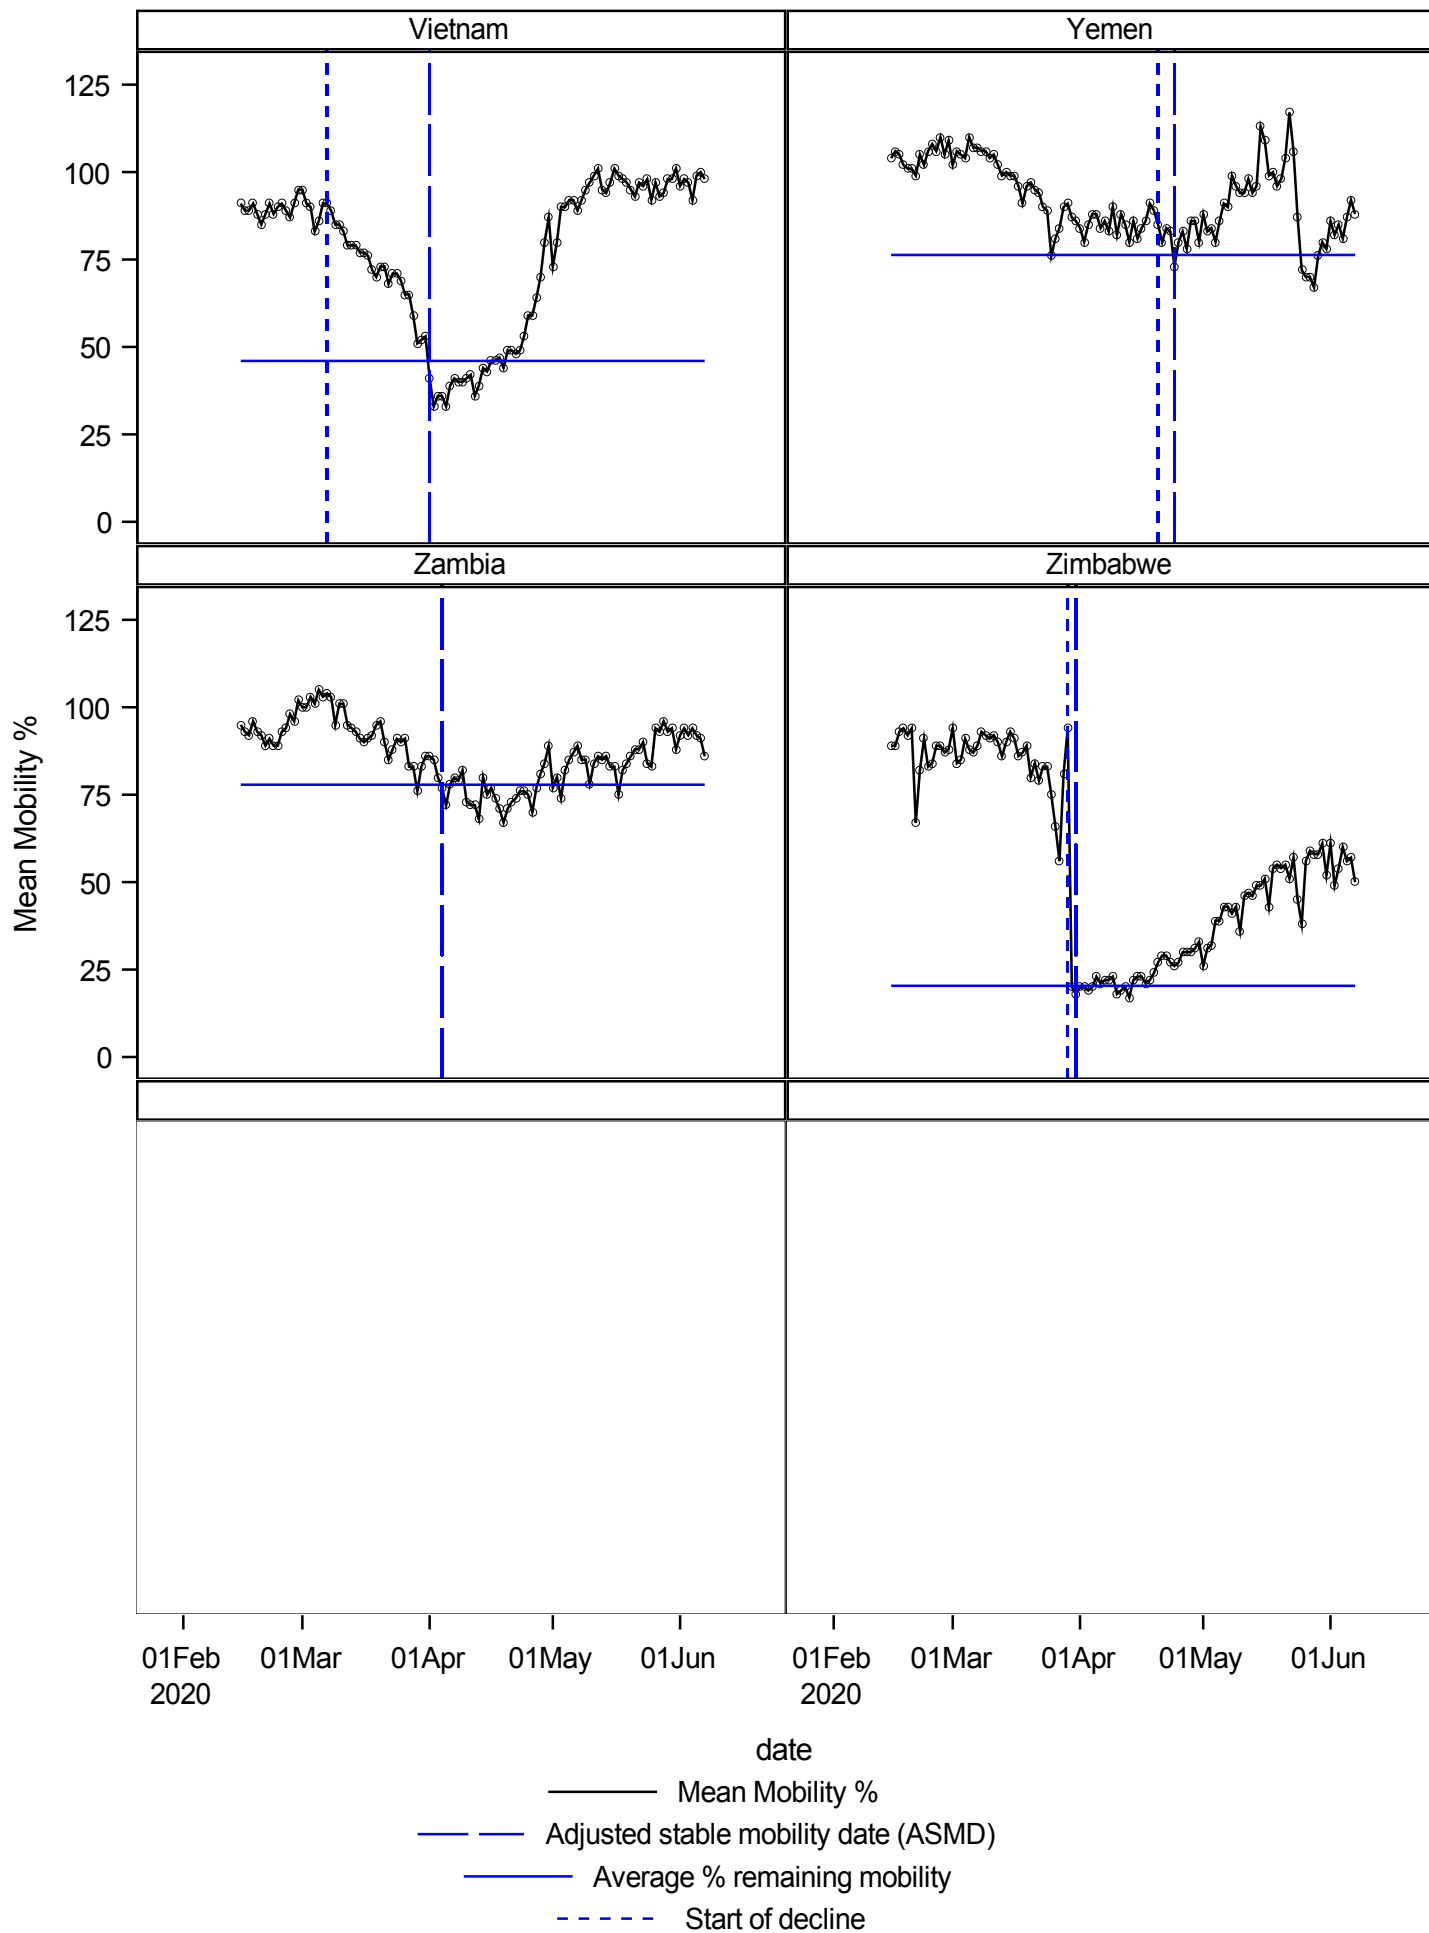

Supplement: 41746_2021_451_MOESM1_ESM.pdf [file 41746_2021_451_MOESM1_ESM.pdf]
